# Supplementary material for: Trends in Food and Beverage Portion Sizes in Australian Children; a Time-Series Analysis Comparing 2007 and 2011–2012 National Data
Source: MDPI journal article supplement (doi:10.3390/children4080069), 2017-08-04
Supplement: s1 [file s1]

**Table S3a: portion size (grams) changes between ANCNPAS 2007 and the NNPAS 2011–12, children 2–4 years old**

|                    | Females                 |           |                            |           |             |                          | Males                   |           |                            |           | Persons     |                          |                         |           |                            |           |             |                          |
|--------------------|-------------------------|-----------|----------------------------|-----------|-------------|--------------------------|-------------------------|-----------|----------------------------|-----------|-------------|--------------------------|-------------------------|-----------|----------------------------|-----------|-------------|--------------------------|
|                    | 2007<br>Median<br>[IQR] |           | 2011–12<br>Median<br>[IQR] |           | Δ<br>Median | p-<br>value <sup>a</sup> | 2007<br>Median<br>[IQR] |           | 2011–12<br>Median<br>[IQR] |           | Δ<br>Median | p-<br>value <sup>a</sup> | 2007<br>Median<br>[IQR] |           | 2011–12<br>Median<br>[IQR] |           | Δ<br>Median | p-<br>value <sup>a</sup> |
| Food               | <i>n</i>                |           | <i>n</i>                   |           |             |                          | <i>n</i>                |           | <i>n</i>                   |           |             |                          | <i>n</i>                |           | <i>n</i>                   |           |             |                          |
| Drinks             |                         |           |                            |           |             |                          |                         |           |                            |           |             |                          |                         |           |                            |           |             |                          |
| Soft Drink         | 89                      | 152 [105] | 24                         | 151 [114] | -1          | 0.25                     | 97                      | 155 [105] | 21                         | 260 [223] | 105         | 0.019                    | 186                     | 153 [105] | 45                         | 182 [135] | 29          | 0.44                     |
| Water              | 1686                    | 180 [150] | 476                        | 250 [360] | 70          | 0.0000                   | 1803                    | 200 [140] | 481                        | 250 [460] | 50          | 0.0000                   | 3489                    | 188 [150] | 957                        | 250 [460] | 62          | 0.0000                   |
| Fruit Juice        | 492                     | 131 [105] | 165                        | 158 [130] | 27          | 0.0003                   | 520                     | 131 [150] | 188                        | 200 [131] | 69          | 0.0000                   | 1012                    | 131 [114] | 353                        | 158 [130] | 27          | 0.0000                   |
| Dairy Foods        |                         |           |                            |           |             |                          |                         |           |                            |           |             |                          |                         |           |                            |           |             |                          |
| Whole Milk         | 1034                    | 155 [119] | 421                        | 155 [160] | 0           | 0.024                    | 1183                    | 165 [133] | 397                        | 193 [155] | 28          | 0.16                     | 2217                    | 155 [129] | 818                        | 161 [155] | 6           | 0.0085                   |
| Reduced Fat Milk   | 219                     | 130 [102] | 80                         | 146 [125] | 16          | 0.93                     | 221                     | 134 [103] | 59                         | 195 [177] | 61          | 0.12                     | 440                     | 130 [103] | 139                        | 156 [125] | 26          | 0.38                     |
| Flavoured Milk     | 68                      | 183 [130] | 26                         | 265 [149] | 82          | 0.0000                   | 80                      | 208 [103] | 29                         | 196 [111] | -12         | 0.96                     | 148                     | 206 [129] | 55                         | 258 [153] | 52          | 0.0031                   |
| Ice cream          | 126                     | 42 [38]   | 44                         | 61 [46]   | 19          | 0.093                    | 109                     | 48 [38]   | 46                         | 56 [67]   | 8           | 0.011                    | 235                     | 47 [38]   | 90                         | 61 [47]   | 14          | 0.0029                   |
| Yoghurt            | 299                     | 100 [50]  | 124                        | 100 [55]  | 0           | 0.19                     | 315                     | 100 [60]  | 118                        | 100 [55]  | 0           | 0.11                     | 614                     | 100 [60]  | 242                        | 100 [60]  | 0           | 0.040                    |
| Cheese             | 440                     | 20 [12]   | 138                        | 21 [6]    | 1           | 0.027                    | 484                     | 21 [13]   | 136                        | 21 [8]    | 0           | 0.0021                   | 924                     | 20 [12]   | 274                        | 21 [8]    | 1           | 0.0002                   |
| Breads and Cereals |                         |           |                            |           |             |                          |                         |           |                            |           |             |                          |                         |           |                            |           |             |                          |
| Hot Porridge       | 56                      | 133 [212] | 37                         | 104 [140] | -29         | 0.51                     | 57                      | 195 [194] | 24                         | 131 [199] | -64         | 0.57                     | 113                     | 190 [204] | 61                         | 104 [146] | -86         | 0.31                     |
| Breakfast Cereal   | 462                     | 23 [17]   | 181                        | 18 [18]   | -5          | 0.35                     | 521                     | 30 [18]   | 184                        | 30 [17]   | 0           | 0.088                    | 983                     | 26 [18]   | 365                        | 25 [18]   | -1          | 0.65                     |
| White Bread        | 494                     | 37 [33]   | 189                        | 48 [35]   | 11          | 0.0033                   | 589                     | 42 [34]   | 185                        | 54 [31]   | 12          | 0.0000                   | 1083                    | 40 [34]   | 374                        | 54 [32]   | 14          | 0.0000                   |
| Mixed Grain Bread  | 109                     | 42 [34]   | 49                         | 48 [42]   | 6           | 0.73                     | 153                     | 48 [34]   | 69                         | 60 [42]   | 12          | 0.049                    | 262                     | 48 [34]   | 118                        | 55 [42]   | 7           | 0.081                    |
| Wholemeal Bread    | 255                     | 40 [32]   | 102                        | 45 [37]   | 5           | 0.0061                   | 246                     | 48 [32]   | 85                         | 50 [34]   | 2           | 0.58                     | 501                     | 42 [33]   | 187                        | 46 [37]   | 4           | 0.019                    |
| Rice               | 128                     | 95 [94]   | 68                         | 67 [74]   | -28         | 0.018                    | 122                     | 95 [141]  | 79                         | 101 [106] | 6           | 0.97                     | 250                     | 95 [97]   | 147                        | 84 [95]   | -11         | 0.15                     |
| Pasta              | 229                     | 113 [111] | 92                         | 131 [139] | 18          | 0.041                    | 247                     | 120 [120] | 73                         | 156 [276] | 36          | 0.017                    | 476                     | 113 [114] | 165                        | 133 [187] | 20          | 0.0018                   |
| Sweets and Snacks  |                         |           |                            |           |             |                          |                         |           |                            |           |             |                          |                         |           |                            |           |             |                          |
| Cakes              | 190                     | 45 [39]   | 73                         | 48 [75]   | 3           | 0.41                     | 218                     | 49 [47]   | 75                         | 59 [105]  | 10          | 0.084                    | 408                     | 47 [42]   | 148                        | 50 [82]   | 3           | 0.088                    |

**Table S3a: portion size (grams) changes between ANCNPAS 2007 and the NNPAS 2011–12, children 2–4 years old**

|                          | Females |              |         |              |     |                      |      |              |         |              |     |                      |      |              |         |              | Males |                      |   |              |  |  |  |  |  |  |  |  |  |  |  |  | Persons |  |  |  |  |  |  |  |  |  |  |  |  |  |  |  |
|--------------------------|---------|--------------|---------|--------------|-----|----------------------|------|--------------|---------|--------------|-----|----------------------|------|--------------|---------|--------------|-------|----------------------|---|--------------|--|--|--|--|--|--|--|--|--|--|--|--|---------|--|--|--|--|--|--|--|--|--|--|--|--|--|--|--|
|                          | 2007    |              | 2011–12 |              | Δ   | p-value <sup>a</sup> | 2007 |              | 2011–12 |              | Δ   | p-value <sup>a</sup> | 2007 |              | 2011–12 |              | Δ     | p-value <sup>a</sup> |   |              |  |  |  |  |  |  |  |  |  |  |  |  |         |  |  |  |  |  |  |  |  |  |  |  |  |  |  |  |
| Food                     | n       | Median [IQR] | n       | Median [IQR] |     |                      | n    | Median [IQR] | n       | Median [IQR] |     |                      | n    | Median [IQR] | n       | Median [IQR] |       |                      | n | Median [IQR] |  |  |  |  |  |  |  |  |  |  |  |  |         |  |  |  |  |  |  |  |  |  |  |  |  |  |  |  |
| Other desserts           | 66      | 86 [64]      | 23      | 100 [93]     | 14  | 0.39                 | 87   | 140 [51]     | 21      | 100 [78]     | -40 | 0.12                 | 153  | 140 [58]     | 44      | 100 [85]     | -40   | 0.082                |   |              |  |  |  |  |  |  |  |  |  |  |  |  |         |  |  |  |  |  |  |  |  |  |  |  |  |  |  |  |
| Plain sweet biscuits     | 171     | 16 [12]      | 101     | 18 [17]      | 2   | 0.0032               | 187  | 16 [14]      | 93      | 18 [21]      | 2   | 0.072                | 358  | 16 [14]      | 194     | 18 [19]      | 2     | 0.0008               |   |              |  |  |  |  |  |  |  |  |  |  |  |  |         |  |  |  |  |  |  |  |  |  |  |  |  |  |  |  |
| Cream/chocolate biscuits | 80      | 19 [11]      | 34      | 22 [14]      | 3   | 0.89                 | 102  | 18 [10]      | 30      | 21 [18]      | 3   | 0.17                 | 182  | 19 [10]      | 64      | 21 [17]      | 2     | 0.28                 |   |              |  |  |  |  |  |  |  |  |  |  |  |  |         |  |  |  |  |  |  |  |  |  |  |  |  |  |  |  |
| Savoury biscuits         | 330     | 13 [11]      | 132     | 12 [10]      | -1  | 0.035                | 332  | 13 [12]      | 114     | 13 [12]      | 0   | 0.69                 | 662  | 13 [12]      | 246     | 12 [10]      | -1    | 0.077                |   |              |  |  |  |  |  |  |  |  |  |  |  |  |         |  |  |  |  |  |  |  |  |  |  |  |  |  |  |  |
| Muesli bars              | 57      | 31 [12]      | 34      | 31 [7]       | 0   | 0.62                 | 62   | 31 [11]      | 35      | 31 [4]       | 0   | 0.17                 | 119  | 31 [11]      | 69      | 31 [3]       | 0     | 0.24                 |   |              |  |  |  |  |  |  |  |  |  |  |  |  |         |  |  |  |  |  |  |  |  |  |  |  |  |  |  |  |
| Main Meals               |         |              |         |              |     |                      |      |              |         |              |     |                      |      |              |         |              |       |                      |   |              |  |  |  |  |  |  |  |  |  |  |  |  |         |  |  |  |  |  |  |  |  |  |  |  |  |  |  |  |
| Mince Dish               | 131     | 70 [70]      | 39      | 156 [156]    | 86  | 0.0000               | 132  | 68 [92]      | 45      | 93 [131]     | 25  | 0.016                | 263  | 70 [85]      | 84      | 134 [145]    | 64    | 0.0000               |   |              |  |  |  |  |  |  |  |  |  |  |  |  |         |  |  |  |  |  |  |  |  |  |  |  |  |  |  |  |
| Plain Meat               | 122     | 46 [41]      | 32      | 93 [108]     | 47  | 0.0005               | 125  | 47 [49]      | 30      | 92 [58]      | 45  | 0.0005               | 247  | 46 [50]      | 62      | 92 [104]     | 46    | 0.0000               |   |              |  |  |  |  |  |  |  |  |  |  |  |  |         |  |  |  |  |  |  |  |  |  |  |  |  |  |  |  |
| Crumbed Chicken          | 73      | 56 [51]      | 42      | 72 [64]      | 16  | 0.077                | 50   | 62 [56]      | 40      | 65 [69]      | 3   | 0.22                 | 123  | 56 [54]      | 82      | 72 [66]      | 16    | 0.031                |   |              |  |  |  |  |  |  |  |  |  |  |  |  |         |  |  |  |  |  |  |  |  |  |  |  |  |  |  |  |
| Plain Chicken            | 121     | 49 [52]      | 54      | 96 [78]      | 47  | 0.027                | 134  | 60 [53]      | 46      | 69 [80]      | 9   | 0.19                 | 255  | 57 [51]      | 100     | 74 [78]      | 17    | 0.0092               |   |              |  |  |  |  |  |  |  |  |  |  |  |  |         |  |  |  |  |  |  |  |  |  |  |  |  |  |  |  |
| Fish                     | 63      | 69 [61]      | 26      | 67 [40]      | -2  | 0.40                 | 60   | 71 [54]      | 28      | 95 [80]      | 24  | 0.45                 | 123  | 71 [59]      | 54      | 67 [85]      | -4    | 0.94                 |   |              |  |  |  |  |  |  |  |  |  |  |  |  |         |  |  |  |  |  |  |  |  |  |  |  |  |  |  |  |
| Soup                     | 50      | 193 [172]    | 39      | 159 [153]    | -34 | 0.23                 | 57   | 229 [183]    | 20      | 278 [190]    | 49  | 0.25                 | 107  | 195 [175]    | 59      | 200 [227]    | 5     | 0.76                 |   |              |  |  |  |  |  |  |  |  |  |  |  |  |         |  |  |  |  |  |  |  |  |  |  |  |  |  |  |  |
| Sausages                 | 96      | 41 [30]      | 41      | 89 [51]      | 48  | 0.0000               | 110  | 44 [39]      | 35      | 89 [39]      | 45  | 0.0000               | 206  | 41 [28]      | 76      | 89 [44]      | 48    | 0.0000               |   |              |  |  |  |  |  |  |  |  |  |  |  |  |         |  |  |  |  |  |  |  |  |  |  |  |  |  |  |  |
| Pizza                    | 29      | 70 [74]      | 22      | 100 [113]    | 30  | 0.0099               | 35   | 95 [82]      | 22      | 138 [106]    | 43  | 0.074                | 64   | 79 [96]      | 44      | 117 [106]    | 38    | 0.0026               |   |              |  |  |  |  |  |  |  |  |  |  |  |  |         |  |  |  |  |  |  |  |  |  |  |  |  |  |  |  |
| Pie                      | 32      | 16 [65]      | 20      | 84 [110]     | 68  | 0.46                 | 58   | 98 [84]      | 19      | 95 [89]      | -3  | 0.95                 | 90   | 97 [76]      | 39      | 88 [115]     | -9    | 0.63                 |   |              |  |  |  |  |  |  |  |  |  |  |  |  |         |  |  |  |  |  |  |  |  |  |  |  |  |  |  |  |
| Other Foods              |         |              |         |              |     |                      |      |              |         |              |     |                      |      |              |         |              |       |                      |   |              |  |  |  |  |  |  |  |  |  |  |  |  |         |  |  |  |  |  |  |  |  |  |  |  |  |  |  |  |
| Chips (not potato)       | 72      | 20 [15]      | 36      | 16 [24]      | -4  | 0.75                 | 80   | 18 [12]      | 33      | 19 [37]      | 1   | 0.72                 | 152  | 18 [13]      | 69      | 19 [25]      | 1     | 0.99                 |   |              |  |  |  |  |  |  |  |  |  |  |  |  |         |  |  |  |  |  |  |  |  |  |  |  |  |  |  |  |
| Potato crisps            | 77      | 20 [7]       | 36      | 21 [15]      | 1   | 0.88                 | 71   | 21 [5]       | 35      | 20 [14]      | -1  | 0.047                | 148  | 21 [6]       | 71      | 20 [14]      | -1    | 0.14                 |   |              |  |  |  |  |  |  |  |  |  |  |  |  |         |  |  |  |  |  |  |  |  |  |  |  |  |  |  |  |
| Ice block - water        | 30      | 70 [41]      | 26      | 75 [0]       | 5   | 0.19                 | 38   | 75 [6]       | 20      | 75 [14]      | 0   | 0.59                 | 68   | 73 [27]      | 46      | 75 [0]       | 2     | 0.60                 |   |              |  |  |  |  |  |  |  |  |  |  |  |  |         |  |  |  |  |  |  |  |  |  |  |  |  |  |  |  |
| Chocolate                | 152     | 15 [10]      | 68      | 15 [17]      | 0   | 0.46                 | 176  | 14 [12]      | 45      | 15 [13]      | 1   | 0.27                 | 328  | 14 [10]      | 113     | 15 [16]      | 1     | 0.22                 |   |              |  |  |  |  |  |  |  |  |  |  |  |  |         |  |  |  |  |  |  |  |  |  |  |  |  |  |  |  |
| Lollies                  | 135     | 12 [12]      | 47      | 15 [19]      | 3   | 0.69                 | 122  | 12 [12]      | 53      | 12 [11]      | 0   | 0.20                 | 257  | 12 [12]      | 100     | 12 [14]      | 0     | 0.51                 |   |              |  |  |  |  |  |  |  |  |  |  |  |  |         |  |  |  |  |  |  |  |  |  |  |  |  |  |  |  |
| Nuts                     | 38      | 13 [18]      | 17      | 10 [17]      | -3  | 0.30                 | 31   | 13 [9]       | 21      | 10 [16]      | -3  | 0.26                 | 69   | 13 [11]      | 38      | 10 [20]      | -3    | 0.40                 |   |              |  |  |  |  |  |  |  |  |  |  |  |  |         |  |  |  |  |  |  |  |  |  |  |  |  |  |  |  |
| Jam/Honey                | 211     | 7 [7]        | 91      | 7 [4]        | 0   | 0.0067               | 260  | 7 [7]        | 87      | 8 [7]        | 1   | 0.072                | 471  | 7 [7]        | 178     | 7 [6]        | 0     | 0.0030               |   |              |  |  |  |  |  |  |  |  |  |  |  |  |         |  |  |  |  |  |  |  |  |  |  |  |  |  |  |  |

**Table S3a: portion size (grams) changes between ANCNPAS 2007 and the NNPAS 2011–12, children 2-4 years old**

|                             | Females                 |                            |             |                          |                         |                            | Males       |                          |                         |                            | Persons     |                          |                         |                            |             |                          |
|-----------------------------|-------------------------|----------------------------|-------------|--------------------------|-------------------------|----------------------------|-------------|--------------------------|-------------------------|----------------------------|-------------|--------------------------|-------------------------|----------------------------|-------------|--------------------------|
|                             | 2007<br>Median<br>[IQR] | 2011–12<br>Median<br>[IQR] | Δ<br>Median | p-<br>value <sup>a</sup> | 2007<br>Median<br>[IQR] | 2011–12<br>Median<br>[IQR] | Δ<br>Median | p-<br>value <sup>a</sup> | 2007<br>Median<br>[IQR] | 2011–12<br>Median<br>[IQR] | Δ<br>Median | p-<br>value <sup>a</sup> | 2007<br>Median<br>[IQR] | 2011–12<br>Median<br>[IQR] | Δ<br>Median | p-<br>value <sup>a</sup> |
| <b>Food</b>                 | <i>n</i>                | <i>n</i>                   |             |                          |
| Peanut butter               | 110                     | 46                         | 1           | 0.15                     | 127                     | 60                         | 2           | 0.022                    | 237                     | 106                        | 2           | 0.41                     |                         |                            |             |                          |
| Vegemite                    | 270                     | 88                         | 2           | 0.30                     | 331                     | 106                        | 2           | 0.90                     | 601                     | 194                        | 2           | 0.45                     |                         |                            |             |                          |
| Tomato Sauce                | 147                     | 41                         | 8           | 0.017                    | 186                     | 53                         | 7           | 0.33                     | 333                     | 94                         | 8           | 0.022                    |                         |                            |             |                          |
| Bacon/Ham                   | 145                     | 54                         | -4          | 0.0002                   | 161                     | 50                         | -8          | 0.0011                   | 306                     | 104                        | -7          | 0.0000                   |                         |                            |             |                          |
| Eggs                        | 108                     | 50                         | 0           | 0.18                     | 106                     | 36                         | 5           | 0.14                     | 214                     | 86                         | 1           | 0.043                    |                         |                            |             |                          |
| <b>Fruit and Vegetables</b> |                         |                            |             |                          |                         |                            |             |                          |                         |                            |             |                          |                         |                            |             |                          |
| Hot Chips                   | 118                     | 64                         | -28         | 0.0004                   | 120                     | 48                         | -46         | 0.0000                   | 238                     | 112                        | -39         | 0.0001                   |                         |                            |             |                          |
| Potato                      | 187                     | 59                         | 3           | 0.99                     | 209                     | 49                         | 9           | 0.63                     | 396                     | 108                        | -1          | 0.79                     |                         |                            |             |                          |
| Peas                        | 113                     | 27                         | 18          | 0.027                    | 140                     | 19                         | 10          | 0.19                     | 253                     | 46                         | 12          | 0.01                     |                         |                            |             |                          |
| Broccoli                    | 116                     | 16                         | -3          | 0.48                     | 107                     | 23                         | -1          | 0.36                     | 223                     | 39                         | -1          | 0.87                     |                         |                            |             |                          |
| Carrots                     | 255                     | 58                         | 14          | 0.0002                   | 298                     | 55                         | 13          | 0.0001                   | 553                     | 113                        | 5           | 0.0003                   |                         |                            |             |                          |
| Corn                        | 106                     | 27                         | 47          | 0.0086                   | 119                     | 23                         | -1          | 0.48                     | 225                     | 50                         | 22          | 0.013                    |                         |                            |             |                          |
| Tomato                      | 135                     | 46                         | -31         | 0.049                    | 131                     | 26                         | -16         | 0.012                    | 266                     | 72                         | -11         | 0.0028                   |                         |                            |             |                          |
| Celery/Cucumber             | 86                      | 22                         | -3          | 0.42                     | 81                      | 23                         | 20          | 0.0051                   | 167                     | 45                         | -3          | 0.14                     |                         |                            |             |                          |
| Dried Fruit                 | 132                     | 35                         | 1           | 0.50                     | 167                     | 48                         | -3          | 0.75                     | 299                     | 83                         | 0           | 0.44                     |                         |                            |             |                          |
| Apple                       | 453                     | 177                        | 40          | 0.0000                   | 509                     | 166                        | 52          | 0.0001                   | 962                     | 343                        | 56          | 0.0000                   |                         |                            |             |                          |
| Orange                      | 186                     | 56                         | 9           | 0.0000                   | 208                     | 50                         | -11         | 0.0018                   | 394                     | 106                        | 3           | 0.0000                   |                         |                            |             |                          |
| Banana                      | 319                     | 98                         | 4           | 0.43                     | 302                     | 119                        | 4           | 0.58                     | 621                     | 217                        | 4           | 0.31                     |                         |                            |             |                          |
| <b>Seasonal Fruit</b>       |                         |                            |             |                          |                         |                            |             |                          |                         |                            |             |                          |                         |                            |             |                          |
| Mixed Berries/Grapes        | 187                     | 105                        | 0           | 0.44                     | 177                     | 106                        | 4           | 0.99                     | 364                     | 211                        | 3           | 0.58                     |                         |                            |             |                          |
| Melon                       | 84                      | 35                         | 0           | 0.92                     | 106                     | 36                         | 12          | 0.88                     | 190                     | 71                         | -2          | 0.72                     |                         |                            |             |                          |

<sup>a</sup>*p*-values without Bonferroni correction

**Table S3b: portion size changes (grams) between ANCNPAS 2007 and the NNPAS 2011–12, children 5–8 years old**

|                    | Females                 |           |                            |           |             |                          |                         |           |                            |           |             |                          |                         |           |                            |           | Males       |                          |  |  |  |  |  |  |  |  |  |  |  |  |  |  | Persons |  |  |  |  |  |  |  |  |  |  |  |  |  |  |  |
|--------------------|-------------------------|-----------|----------------------------|-----------|-------------|--------------------------|-------------------------|-----------|----------------------------|-----------|-------------|--------------------------|-------------------------|-----------|----------------------------|-----------|-------------|--------------------------|--|--|--|--|--|--|--|--|--|--|--|--|--|--|---------|--|--|--|--|--|--|--|--|--|--|--|--|--|--|--|
|                    | 2007<br>Median<br>[IQR] |           | 2011–12<br>Median<br>[IQR] |           | Δ<br>Median | p-<br>value <sup>a</sup> | 2007<br>Median<br>[IQR] |           | 2011–12<br>Median<br>[IQR] |           | Δ<br>Median | p-<br>value <sup>a</sup> | 2007<br>Median<br>[IQR] |           | 2011–12<br>Median<br>[IQR] |           | Δ<br>Median | p-<br>value <sup>a</sup> |  |  |  |  |  |  |  |  |  |  |  |  |  |  |         |  |  |  |  |  |  |  |  |  |  |  |  |  |  |  |
| Food               | n                       |           | n                          |           |             |                          | n                       |           | n                          |           |             |                          | n                       |           | n                          |           |             |                          |  |  |  |  |  |  |  |  |  |  |  |  |  |  |         |  |  |  |  |  |  |  |  |  |  |  |  |  |  |  |
| Drinks             |                         |           |                            |           |             |                          |                         |           |                            |           |             |                          |                         |           |                            |           |             |                          |  |  |  |  |  |  |  |  |  |  |  |  |  |  |         |  |  |  |  |  |  |  |  |  |  |  |  |  |  |  |
| Soft Drink         | 117                     | 234 [148] | 75                         | 208 [156] | -26         | 0.35                     | 129                     | 293 [190] | 48                         | 255 [174] | -38         | 0.10                     | 246                     | 261 [171] | 123                        | 250 [209] | -11         | 0.023                    |  |  |  |  |  |  |  |  |  |  |  |  |  |  |         |  |  |  |  |  |  |  |  |  |  |  |  |  |  |  |
| Water              | 1087                    | 230 [195] | 393                        | 350 [550] | 120         | 0.0000                   | 1076                    | 250 [250] | 413                        | 360 [800] | 110         | 0.0000                   | 2163                    | 250 [245] | 806                        | 350 [800] | 100         | 0.0000                   |  |  |  |  |  |  |  |  |  |  |  |  |  |  |         |  |  |  |  |  |  |  |  |  |  |  |  |  |  |  |
| Fruit Juice        | 282                     | 210 [131] | 142                        | 208 [113] | -2          | 0.24                     | 345                     | 241 [131] | 149                        | 210 [107] | -31         | 0.49                     | 627                     | 210 [131] | 291                        | 210 [116] | 0           | 0.24                     |  |  |  |  |  |  |  |  |  |  |  |  |  |  |         |  |  |  |  |  |  |  |  |  |  |  |  |  |  |  |
| Dairy Foods        |                         |           |                            |           |             |                          |                         |           |                            |           |             |                          |                         |           |                            |           |             |                          |  |  |  |  |  |  |  |  |  |  |  |  |  |  |         |  |  |  |  |  |  |  |  |  |  |  |  |  |  |  |
| Whole Milk         | 376                     | 194 [129] | 227                        | 193 [165] | -1          | 0.027                    | 418                     | 206 [129] | 240                        | 206 [155] | 0           | 0.0000                   | 794                     | 206 [129] | 467                        | 206 [155] | 0           | 0.0000                   |  |  |  |  |  |  |  |  |  |  |  |  |  |  |         |  |  |  |  |  |  |  |  |  |  |  |  |  |  |  |
| Reduced Fat Milk   | 125                     | 156 [108] | 53                         | 146 [114] | -10         | 0.72                     | 147                     | 194 [129] | 65                         | 208 [130] | 14          | 0.069                    | 272                     | 170 [129] | 118                        | 156 [156] | -14         | 0.28                     |  |  |  |  |  |  |  |  |  |  |  |  |  |  |         |  |  |  |  |  |  |  |  |  |  |  |  |  |  |  |
| Flavoured Milk     | 81                      | 226 [72]  | 29                         | 212 [193] | -14         | 0.86                     | 63                      | 256 [124] | 34                         | 265 [99]  | 9           | 0.041                    | 144                     | 250 [93]  | 63                         | 265 [160] | 15          | 0.092                    |  |  |  |  |  |  |  |  |  |  |  |  |  |  |         |  |  |  |  |  |  |  |  |  |  |  |  |  |  |  |
| Ice cream          | 123                     | 56 [81]   | 39                         | 78 [56]   | 22          | 0.062                    | 114                     | 62 [73]   | 54                         | 80 [83]   | 18          | 0.021                    | 237                     | 60 [75]   | 93                         | 78 [77]   | 18          | 0.0019                   |  |  |  |  |  |  |  |  |  |  |  |  |  |  |         |  |  |  |  |  |  |  |  |  |  |  |  |  |  |  |
| Yoghurt            | 107                     | 100 [80]  | 61                         | 100 [92]  | 0           | 0.41                     | 121                     | 100 [80]  | 65                         | 100 [80]  | 0           | 0.16                     | 228                     | 100 [80]  | 126                        | 100 [88]  | 0           | 0.12                     |  |  |  |  |  |  |  |  |  |  |  |  |  |  |         |  |  |  |  |  |  |  |  |  |  |  |  |  |  |  |
| Cheese             | 223                     | 21 [20]   | 104                        | 25 [7]    | 4           | 0.28                     | 259                     | 21 [11]   | 111                        | 21 [11]   | 0           | 0.70                     | 482                     | 21 [16]   | 215                        | 21 [11]   | 0           | 0.57                     |  |  |  |  |  |  |  |  |  |  |  |  |  |  |         |  |  |  |  |  |  |  |  |  |  |  |  |  |  |  |
| Breads and Cereals |                         |           |                            |           |             |                          |                         |           |                            |           |             |                          |                         |           |                            |           |             |                          |  |  |  |  |  |  |  |  |  |  |  |  |  |  |         |  |  |  |  |  |  |  |  |  |  |  |  |  |  |  |
| Hot Porridge       | 29                      | 130 [174] | 17                         | 202 [208] | 72          | 0.38                     | 17                      | 130 [220] | 22                         | 202 [260] | 72          | 0.12                     | 46                      | 130 [200] | 39                         | 202 [260] | 72          | 0.086                    |  |  |  |  |  |  |  |  |  |  |  |  |  |  |         |  |  |  |  |  |  |  |  |  |  |  |  |  |  |  |
| Breakfast Cereal   | 257                     | 30 [21]   | 139                        | 30 [15]   | 0           | 0.31                     | 299                     | 33 [18]   | 169                        | 34 [21]   | 1           | 0.22                     | 556                     | 30 [15]   | 308                        | 34 [17]   | 4           | 0.13                     |  |  |  |  |  |  |  |  |  |  |  |  |  |  |         |  |  |  |  |  |  |  |  |  |  |  |  |  |  |  |
| White Bread        | 399                     | 56 [27]   | 219                        | 56 [30]   | 0           | 0.26                     | 394                     | 62 [18]   | 228                        | 64 [29]   | 2           | 0.18                     | 793                     | 60 [27]   | 447                        | 64 [29]   | 4           | 0.066                    |  |  |  |  |  |  |  |  |  |  |  |  |  |  |         |  |  |  |  |  |  |  |  |  |  |  |  |  |  |  |
| Mixed Grain Bread  | 67                      | 62 [34]   | 33                         | 70 [12]   | 8           | 0.050                    | 52                      | 64 [31]   | 32                         | 72 [44]   | 8           | 0.39                     | 119                     | 64 [28]   | 65                         | 72 [27]   | 8           | 0.041                    |  |  |  |  |  |  |  |  |  |  |  |  |  |  |         |  |  |  |  |  |  |  |  |  |  |  |  |  |  |  |
| Wholemeal Bread    | 115                     | 57 [24]   | 63                         | 58 [34]   | 1           | 0.96                     | 151                     | 60 [26]   | 76                         | 66 [10]   | 6           | 0.0034                   | 266                     | 60 [25]   | 139                        | 66 [24]   | 6           | 0.026                    |  |  |  |  |  |  |  |  |  |  |  |  |  |  |         |  |  |  |  |  |  |  |  |  |  |  |  |  |  |  |
| Rice               | 73                      | 111 [101] | 56                         | 119 [144] | 8           | 0.31                     | 64                      | 162 [158] | 53                         | 114 [84]  | -48         | 0.011                    | 137                     | 144 [114] | 109                        | 114 [108] | -30         | 0.016                    |  |  |  |  |  |  |  |  |  |  |  |  |  |  |         |  |  |  |  |  |  |  |  |  |  |  |  |  |  |  |
| Pasta              | 102                     | 150 [115] | 59                         | 207 [223] | 57          | 0.0050                   | 128                     | 150 [150] | 49                         | 230 [240] | 80          | 0.0000                   | 230                     | 150 [133] | 108                        | 215 [245] | 65          | 0.0000                   |  |  |  |  |  |  |  |  |  |  |  |  |  |  |         |  |  |  |  |  |  |  |  |  |  |  |  |  |  |  |
| Sweets and Snacks  |                         |           |                            |           |             |                          |                         |           |                            |           |             |                          |                         |           |                            |           |             |                          |  |  |  |  |  |  |  |  |  |  |  |  |  |  |         |  |  |  |  |  |  |  |  |  |  |  |  |  |  |  |
| Cakes              | 177                     | 53 [51]   | 84                         | 63 [88]   | 10          | 0.10                     | 145                     | 53 [50]   | 83                         | 76 [92]   | 23          | 0.011                    | 322                     | 53 [50]   | 167                        | 69 [94]   | 16          | 0.0034                   |  |  |  |  |  |  |  |  |  |  |  |  |  |  |         |  |  |  |  |  |  |  |  |  |  |  |  |  |  |  |

**Table S3b: portion size changes (grams) between ANCNPAS 2007 and the NNPAS 2011–12, children 5–8 years old**

|                          | Females                 |           |                            |           |             |                          | Males                   |           |                            |           | Persons     |                          |                         |           |                            |           |             |                          |
|--------------------------|-------------------------|-----------|----------------------------|-----------|-------------|--------------------------|-------------------------|-----------|----------------------------|-----------|-------------|--------------------------|-------------------------|-----------|----------------------------|-----------|-------------|--------------------------|
|                          | 2007<br>Median<br>[IQR] |           | 2011–12<br>Median<br>[IQR] |           | Δ<br>Median | p-<br>value <sup>a</sup> | 2007<br>Median<br>[IQR] |           | 2011–12<br>Median<br>[IQR] |           | Δ<br>Median | p-<br>value <sup>a</sup> | 2007<br>Median<br>[IQR] |           | 2011–12<br>Median<br>[IQR] |           | Δ<br>Median | p-<br>value <sup>a</sup> |
| Food                     | n                       |           | n                          |           |             |                          | n                       |           | n                          |           |             |                          | n                       |           | n                          |           |             |                          |
| Sweet pie/pastry         | 27                      | 50 [43]   | 19                         | 67 [30]   | 17          | 0.10                     | 30                      | 60 [29]   | 28                         | 67 [24]   | 7           | 0.41                     | 57                      | 60 [36]   | 47                         | 67 [24]   | 7           | 0.11                     |
| Other desserts           | 42                      | 145 [92]  | 20                         | 100 [91]  | -45         | 0.18                     | 41                      | 150 [50]  | 15                         | 100 [70]  | -50         | 0.091                    | 83                      | 150 [50]  | 35                         | 100 [88]  | -50         | 0.028                    |
| Plain sweet biscuits     | 102                     | 22 [12]   | 80                         | 18 [18]   | -4          | 0.34                     | 103                     | 24 [19]   | 77                         | 25 [18]   | 1           | 0.14                     | 205                     | 22 [15]   | 157                        | 20 [17]   | -2          | 0.093                    |
| Cream/chocolate biscuits | 76                      | 20 [13]   | 31                         | 18 [15]   | -2          | 0.090                    | 87                      | 21 [19]   | 40                         | 23 [13]   | 2           | 0.75                     | 163                     | 20 [15]   | 71                         | 20 [13]   | 0           | 0.19                     |
| Savoury biscuits         | 183                     | 18 [15]   | 101                        | 17 [14]   | -1          | 0.60                     | 174                     | 20 [13]   | 101                        | 18 [18]   | -2          | 0.23                     | 357                     | 18 [13]   | 202                        | 18 [16]   | 0           | 0.60                     |
| Savoury combi snack      | 27                      | 25 [0]    | 16                         | 24 [13]   | -1          | 0.014                    | 27                      | 25 [0]    | 15                         | 24 [1]    | -1          | 0.0025                   | 54                      | 25 [0]    | 31                         | 24 [1]    | -1          | 0.0001                   |
| Muesli bars              | 59                      | 31 [13]   | 38                         | 31 [9]    | 0           | 0.52                     | 66                      | 31 [11]   | 56                         | 31 [9]    | 0           | 0.73                     | 125                     | 31 [11]   | 94                         | 31 [9]    | 0           | 0.55                     |
| Main Meals               |                         |           |                            |           |             |                          |                         |           |                            |           |             |                          |                         |           |                            |           |             |                          |
| Mince Dish               | 67                      | 86 [100]  | 26                         | 150 [272] | 64          | 0.0073                   | 96                      | 94 [127]  | 27                         | 156 [246] | 62          | 0.043                    | 163                     | 89 [117]  | 53                         | 150 [246] | 61          | 0.0011                   |
| Plain Meat               | 69                      | 56 [50]   | 24                         | 105 [68]  | 50          | 0.0083                   | 81                      | 67 [59]   | 25                         | 104 [81]  | 37          | 0.0002                   | 150                     | 65 [53]   | 49                         | 104 [82]  | 39          | 0.0000                   |
| Crumbed Chicken          | 59                      | 66 [36]   | 40                         | 66 [74]   | 0           | 0.93                     | 56                      | 82 [62]   | 27                         | 75 [68]   | -7          | 0.66                     | 115                     | 72 [54]   | 67                         | 72 [77]   | 0           | 0.65                     |
| Plain Chicken            | 86                      | 67 [71]   | 34                         | 81 [80]   | 14          | 0.16                     | 87                      | 76 [85]   | 27                         | 105 [83]  | 29          | 0.42                     | 173                     | 72 [80]   | 61                         | 100 [78]  | 28          | 0.13                     |
| Fish                     | 42                      | 73 [65]   | 25                         | 71 [64]   | -2          | 0.70                     | 29                      | 71 [61]   | 19                         | 67 [55]   | -4          | 0.26                     | 71                      | 71 [65]   | 44                         | 69 [59]   | -2          | 0.30                     |
| Soup                     | 36                      | 300 [259] | 16                         | 289 [394] | -11         | 0.47                     | 30                      | 253 [237] | 18                         | 306 [179] | 53          | 0.16                     | 66                      | 259 [256] | 34                         | 303 [309] | 44          | 0.18                     |
| Sausages                 | 65                      | 57 [30]   | 30                         | 89 [43]   | 32          | 0.0002                   | 78                      | 58 [38]   | 39                         | 89 [102]  | 31          | 0.0000                   | 143                     | 58 [39]   | 69                         | 89 [101]  | 31          | 0.0000                   |
| Pizza                    | 37                      | 116 [87]  | 20                         | 155 [94]  | 39          | 0.054                    | 31                      | 130 [134] | 23                         | 188 [147] | 58          | 0.029                    | 68                      | 123 [101] | 43                         | 185 [122] | 62          | 0.0027                   |
| Pie                      | 56                      | 124 [96]  | 19                         | 130 [72]  | 6           | 0.39                     | 44                      | 140 [58]  | 22                         | 131 [61]  | -9          | 0.50                     | 100                     | 130 [64]  | 41                         | 130 [61]  | 0           | 0.73                     |
| Other Foods              |                         |           |                            |           |             |                          |                         |           |                            |           |             |                          |                         |           |                            |           |             |                          |
| Chips (not potato)       | 52                      | 20 [23]   | 41                         | 25 [21]   | 5           | 0.94                     | 66                      | 25 [25]   | 47                         | 22 [26]   | -3          | 0.77                     | 118                     | 25 [24]   | 88                         | 25 [21]   | 0           | 0.84                     |
| Potato crisps            | 96                      | 21 [1]    | 52                         | 21 [17]   | 0           | 0.79                     | 106                     | 21 [30]   | 47                         | 21 [7]    | 0           | 0.053                    | 202                     | 21 [7]    | 99                         | 21 [9]    | 0           | 0.12                     |
| Ice block - cream        | 23                      | 59 [23]   | 19                         | 80 [9]    | 21          | 0.004                    | 23                      | 64[20]    | 25                         | 80 [9]    | 16          | 0.0010                   | 46                      | 64 [20]   | 44                         | 80 [9]    | 16          | 0.0000                   |
| Ice block - water        | 42                      | 74 [7]    | 37                         | 75 [0]    | 1           | 0.56                     | 36                      | 75 [8]    | 33                         | 75 [0]    | 0           | 0.13                     | 78                      | 75 [6]    | 70                         | 75 [0]    | 0           | 0.14                     |

**Table S3b: portion size changes (grams) between ANCNPAS 2007 and the NNPAS 2011–12, children 5–8 years old**

|                            | Females        |          |                   |          |                    |                             | Males          |          |                   |          | Persons            |                             |                |          |                   |          |                    |                             |
|----------------------------|----------------|----------|-------------------|----------|--------------------|-----------------------------|----------------|----------|-------------------|----------|--------------------|-----------------------------|----------------|----------|-------------------|----------|--------------------|-----------------------------|
|                            | 2007<br>Median |          | 2011–12<br>Median |          | $\Delta$<br>Median | $p$ -<br>value <sup>a</sup> | 2007<br>Median |          | 2011–12<br>Median |          | $\Delta$<br>Median | $p$ -<br>value <sup>a</sup> | 2007<br>Median |          | 2011–12<br>Median |          | $\Delta$<br>Median | $p$ -<br>value <sup>a</sup> |
| Food                       | <i>n</i>       | [IQR]    | <i>n</i>          | [IQR]    |                    |                             | <i>n</i>       | [IQR]    | <i>n</i>          | [IQR]    |                    |                             | <i>n</i>       | [IQR]    | <i>n</i>          | [IQR]    |                    |                             |
| Chocolate                  | 166            | 20 [23]  | 66                | 19 [25]  | -1                 | 0.75                        | 159            | 20 [28]  | 62                | 19 [15]  | -1                 | 0.71                        | 325            | 20 [25]  | 128               | 19 [22]  | -1                 | 0.65                        |
| Lollies                    | 131            | 14 [16]  | 57                | 15 [13]  | 1                  | 0.83                        | 127            | 16 [14]  | 60                | 15 [20]  | -1                 | 0.70                        | 258            | 15 [16]  | 117               | 15 [17]  | 0                  | 0.92                        |
| Salad dressing<br>full fat | 22             | 5 [13]   | 11                | 21 [7]   | 16                 | 0.0019                      | 26             | 9 [15]   | 23                | 14 [14]  | 5                  | 0.080                       | 48             | 6 [14]   | 34                | 14 [7]   | 8                  | 0.0009                      |
| Jam/Honey                  | 124            | 12 [7]   | 71                | 8 [7]    | -4                 | 0.79                        | 122            | 8 [7]    | 81                | 8 [7]    | 0                  | 0.46                        | 246            | 11 [7]   | 152               | 8 [7]    | -3                 | 0.45                        |
| Peanut butter              | 84             | 10 [13]  | 36                | 9 [4]    | -1                 | 0.055                       | 96             | 10 [13]  | 41                | 9 [4]    | -1                 | 0.14                        | 180            | 10 [13]  | 77                | 9 [4]    | -1                 | 0.015                       |
| Vegemite                   | 157            | 5 [4]    | 70                | 6 [3]    | 1                  | 0.17                        | 140            | 5 [4]    | 67                | 6 [1]    | 1                  | 0.32                        | 297            | 5 [4]    | 137               | 6 [4]    | 1                  | 0.76                        |
| Tomato Sauce               | 148            | 11 [16]  | 38                | 14 [7]   | 3                  | 0.0049                      | 145            | 13 [16]  | 52                | 14 [16]  | 1                  | 0.046                       | 293            | 11 [16]  | 90                | 14 [14]  | 3                  | 0.0005                      |
| Bacon/Ham                  | 107            | 34 [26]  | 59                | 17 [8]   | -17                | 0.0000                      | 128            | 29 [30]  | 62                | 17 [17]  | -12                | 0.0000                      | 235            | 30 [26]  | 121               | 17 [9]   | -13                | 0.0000                      |
| Eggs                       | 64             | 44 [36]  | 47                | 55 [36]  | 11                 | 0.0056                      | 76             | 43 [52]  | 35                | 47 [27]  | 4                  | 0.27                        | 140            | 43 [45]  | 82                | 53 [36]  | 10                 | 0.0091                      |
| Fruit and<br>Vegetables    |                |          |                   |          |                    |                             |                |          |                   |          |                    |                             |                |          |                   |          |                    |                             |
| Hot Chips                  | 108            | 75 [40]  | 51                | 48 [67]  | -27                | 0.0001                      | 97             | 77 [38]  | 51                | 57 [57]  | -20                | 0.0000                      | 205            | 75 [40]  | 102               | 55 [67]  | -20                | 0.0000                      |
| Potato                     | 111            | 75 [73]  | 47                | 83 [97]  | 8                  | 0.80                        | 106            | 92 [78]  | 44                | 83 [103] | -9                 | 0.84                        | 217            | 75 [76]  | 91                | 83 [97]  | 8                  | 0.94                        |
| Peas                       | 61             | 20 [29]  | 15                | 26 [27]  | 6                  | 0.63                        | 56             | 22 [29]  | 15                | 35 [40]  | 13                 | 0.26                        | 117            | 20 [29]  | 0                 | 30 [27]  | 10                 | 0.25                        |
| Broccoli                   | 63             | 26 [21]  | 15                | 47 [24]  | 21                 | 0.0087                      | 67             | 26 [33]  | 23                | 19 [53]  | -7                 | 0.41                        | 130            | 26 [21]  | 38                | 35 [39]  | 9                  | 0.34                        |
| Carrots                    | 166            | 29 [28]  | 57                | 37 [49]  | 8                  | 0.0004                      | 160            | 30 [37]  | 52                | 44 [100] | 14                 | 0.0077                      | 326            | 29 [33]  | 109               | 38 [54]  | 9                  | 0.0000                      |
| Corn                       | 57             | 24 [48]  | 12                | 61 [85]  | 37                 | 0.022                       | 48             | 35 [37]  | 24                | 75 [98]  | 40                 | 0.0003                      | 105            | 32 [44]  | 36                | 71 [98]  | 39                 | 0.0000                      |
| Tomato                     | 77             | 60 [46]  | 24                | 29 [19]  | -31                | 0.0000                      | 82             | 47 [50]  | 30                | 29 [22]  | -18                | 0.010                       | 159            | 51 [49]  | 54                | 29 [22]  | -22                | 0.0000                      |
| Lettuce                    | 59             | 8 [9]    | 14                | 12 [0]   | 4                  | 0.21                        | 72             | 11 [20]  | 20                | 16 [16]  | 5                  | 0.068                       | 131            | 9 [13]   | 34                | 13 [13]  | 4                  | 0.022                       |
| Celery/Cucumber            | 71             | 25 [18]  | 23                | 31 [89]  | 6                  | 0.20                        | 73             | 20 [30]  | 16                | 30 [33]  | 10                 | 0.15                        | 144            | 24 [24]  | 39                | 31 [64]  | 7                  | 0.048                       |
| Apple                      | 238            | 156 [72] | 148               | 151 [54] | -5                 | 0.12                        | 224            | 166 [58] | 157               | 164 [25] | -2                 | 0.21                        | 462            | 161 [58] | 305               | 158 [29] | -3                 | 0.053                       |
| Orange                     | 116            | 86 [45]  | 76                | 75 [56]  | -11                | 0.27                        | 98             | 86 [59]  | 49                | 75 [56]  | -11                | 0.22                        | 214            | 86 [45]  | 125               | 75 [56]  | -11                | 0.10                        |
| Banana                     | 125            | 121 [27] | 58                | 98 [24]  | -23                | 0.0000                      | 129            | 121 [27] | 73                | 98 [13]  | -23                | 0.064                       | 254            | 121 [27] | 131               | 98 [0]   | -23                | 0.0000                      |
| Seasonal Fruit             |                |          |                   |          |                    |                             |                |          |                   |          |                    |                             |                |          |                   |          |                    |                             |

**Table S3b: portion size changes (grams) between ANCNPAS 2007 and the NNPAS 2011-12, children 5-8 years old**

|                      | Females                 |           |                            |          |             |                          |                         |           |                            |           |             |                          | Males                   |           |                            |          | Persons     |                          |  |  |
|----------------------|-------------------------|-----------|----------------------------|----------|-------------|--------------------------|-------------------------|-----------|----------------------------|-----------|-------------|--------------------------|-------------------------|-----------|----------------------------|----------|-------------|--------------------------|--|--|
|                      | 2007<br>Median<br>[IQR] |           | 2011–12<br>Median<br>[IQR] |          | Δ<br>Median | p-<br>value <sup>a</sup> | 2007<br>Median<br>[IQR] |           | 2011–12<br>Median<br>[IQR] |           | Δ<br>Median | p-<br>value <sup>a</sup> | 2007<br>Median<br>[IQR] |           | 2011–12<br>Median<br>[IQR] |          | Δ<br>Median | p-<br>value <sup>a</sup> |  |  |
| Food                 | n                       |           | n                          |          |             |                          | n                       |           | n                          |           |             |                          | n                       |           | n                          |          |             |                          |  |  |
| Mixed Berries/Grapes | 73                      | 60 [71]   | 75                         | 50 [57]  | -10         | 0.030                    | 63                      | 56 [49]   | 73                         | 60 [49]   | 4           | 0.82                     | 136                     | 60 [78]   | 148                        | 53 [49]  | -7          | 0.12                     |  |  |
| Melon                | 55                      | 133 [113] | 29                         | 128 [85] | -5          | 0.90                     | 48                      | 150 [217] | 30                         | 138 [116] | -12         | 0.28                     | 103                     | 143 [151] | 59                         | 128 [95] | -15         | 0.41                     |  |  |

<sup>a</sup>*p*-values without Bonferroni correction

**Table S3c: portion size changes (grams) between ANCNPAS 2007 and the NNPAS 2011–12, children 9–12 years old**

|                    | Females                 |           |                            |           |             |                          |                         |           |                            |           |             |                          | Males                   |           |                            |           | Persons     |                          |  |  |
|--------------------|-------------------------|-----------|----------------------------|-----------|-------------|--------------------------|-------------------------|-----------|----------------------------|-----------|-------------|--------------------------|-------------------------|-----------|----------------------------|-----------|-------------|--------------------------|--|--|
|                    | 2007<br>Median<br>[IQR] |           | 2011–12<br>Median<br>[IQR] |           | Δ<br>Median | p-<br>value <sup>a</sup> | 2007<br>Median<br>[IQR] |           | 2011–12<br>Median<br>[IQR] |           | Δ<br>Median | p-<br>value <sup>a</sup> | 2007<br>Median<br>[IQR] |           | 2011–12<br>Median<br>[IQR] |           | Δ<br>Median | p-<br>value <sup>a</sup> |  |  |
| Food               | n                       |           | n                          |           |             |                          | n                       |           | n                          |           |             |                          | n                       |           | n                          |           |             |                          |  |  |
| Drinks             |                         |           |                            |           |             |                          |                         |           |                            |           |             |                          |                         |           |                            |           |             |                          |  |  |
| Diet soft drink    | 32                      | 278 [260] | 17                         | 290 [175] | 12          | 0.71                     | 31                      | 300 [145] | 24                         | 290 [125] | -10         | 0.57                     | 63                      | 280 [175] | 41                         | 290 [175] | 10          | 0.87                     |  |  |
| Soft Drink         | 194                     | 263 [182] | 89                         | 302 [130] | 39          | 0.74                     | 209                     | 245 [195] | 100                        | 364 [96]  | 119         | 0.16                     | 403                     | 304 [182] | 189                        | 312 [130] | 8           | 0.52                     |  |  |
| Water              | 1259                    | 250 [228] | 444                        | 350 [800] | 100         | 0.0000                   | 1110                    | 250 [250] | 477                        | 350 [790] | 100         | 0.0000                   | 2369                    | 250 [235] | 921                        | 350 [800] | 100         | 0.0000                   |  |  |
| Fruit Juice        | 322                     | 263 [105] | 155                        | 260 [74]  | -3          | 0.0063                   | 266                     | 261 [52]  | 145                        | 263 [154] | 2           | 0.0025                   | 588                     | 241 [62]  | 300                        | 260 [97]  | 19          | 0.0000                   |  |  |
| Tea or coffee      | 57                      | 240 [34]  | 22                         | 200 [20]  | -40         | 0.0081                   | 32                      | 240 [62]  | 24                         | 220 [50]  | -20         | 0.86                     | 89                      | 240 [40]  | 46                         | 220 [50]  | -20         | 0.070                    |  |  |
| Dairy Foods        |                         |           |                            |           |             |                          |                         |           |                            |           |             |                          |                         |           |                            |           |             |                          |  |  |
| Whole Milk         | 322                     | 232 [129] | 151                        | 206 [129] | -26         | 0.10                     | 346                     | 257 [257] | 218                        | 206 [129] | -51         | 0.0005                   | 668                     | 237 [129] | 369                        | 206 [129] | -31         | 0.0003                   |  |  |
| Reduced Fat Milk   | 174                     | 194 [172] | 87                         | 208 [156] | 14          | 0.023                    | 177                     | 237 [131] | 80                         | 208 [211] | -29         | 0.88                     | 351                     | 206 [129] | 167                        | 208 [156] | 2           | 0.13                     |  |  |
| Flavoured Milk     | 88                      | 258 [137] | 32                         | 352 [186] | 94          | 0.0011                   | 79                      | 258 [124] | 40                         | 340 [203] | 82          | 0.035                    | 167                     | 258 [115] | 72                         | 351 [199] | 93          | 0.0001                   |  |  |
| Ice cream          | 124                     | 100 [74]  | 58                         | 89 [66]   | -11         | 0.41                     | 107                     | 90 [174]  | 54                         | 102 [96]  | 12          | 0.018                    | 231                     | 93 [74]   | 112                        | 96 [81]   | 3           | 0.028                    |  |  |
| Yoghurt            | 78                      | 100 [107] | 49                         | 123 [100] | 23          | 0.39                     | 77                      | 100 [100] | 42                         | 136 [73]  | 36          | 0.081                    | 155                     | 100 [100] | 91                         | 123 [75]  | 23          | 0.063                    |  |  |
| Cheese             | 252                     | 21 [15]   | 73                         | 25 [10]   | 4           | 0.50                     | 203                     | 21 [21]   | 89                         | 25 [18]   | 4           | 0.073                    | 455                     | 21 [20]   | 162                        | 25 [12]   | 4           | 0.066                    |  |  |
| Breads and Cereals |                         |           |                            |           |             |                          |                         |           |                            |           |             |                          |                         |           |                            |           |             |                          |  |  |
| Breakfast Cereal   | 199                     | 41 [30]   | 111                        | 36 [24]   | -5          | 0.73                     | 271                     | 45 [36]   | 147                        | 43 [36]   | -2          | 0.31                     | 470                     | 45 [30]   | 258                        | 39 [27]   | -6          | 0.53                     |  |  |
| White Bread        | 400                     | 62 [24]   | 226                        | 64 [31]   | 2           | 0.49                     | 402                     | 64 [26]   | 268                        | 64 [16]   | 0           | 0.16                     | 802                     | 64 [32]   | 494                        | 64 [15]   | 0           | 0.10                     |  |  |
| Mixed Grain Bread  | 66                      | 64 [25]   | 25                         | 72 [12]   | 8           | 0.31                     | 43                      | 66 [29]   | 32                         | 72 [31]   | 6           | 0.29                     | 109                     | 64 [27]   | 57                         | 72 [27]   | 8           | 0.14                     |  |  |
| Wholemeal Bread    | 97                      | 64 [28]   | 42                         | 66 [10]   | 2           | 0.14                     | 99                      | 64 [16]   | 58                         | 66 [20]   | 2           | 0.17                     | 196                     | 64 [24]   | 100                        | 66 [10]   | 2           | 0.047                    |  |  |
| Rice               | 86                      | 158 [121] | 72                         | 168 [123] | 10          | 0.84                     | 73                      | 190 [165] | 66                         | 134 [134] | -56         | 0.0023                   | 159                     | 190 [125] | 138                        | 141 [142] | -49         | 0.021                    |  |  |
| Pasta              | 112                     | 150 [113] | 58                         | 240 [391] | 90          | 0.0030                   | 106                     | 197 [170] | 75                         | 312 [276] | 115         | 0.0000                   | 218                     | 184 [170] | 133                        | 312 [312] | 128         | 0.0000                   |  |  |
| Sweets and Snacks  |                         |           |                            |           |             |                          |                         |           |                            |           |             |                          |                         |           |                            |           |             |                          |  |  |
| Cakes              | 172                     | 61 [65]   | 82                         | 102 [113] | 41          | 0.0006                   | 140                     | 71[82]    | 81                         | 94 [115]  | 23          | 0.081                    | 312                     | 62 [71]   | 163                        | 95 [115]  | 33          | 0.0002                   |  |  |



**Table S3c: portion size changes (grams) between ANCNPAS 2007 and the NNPAS 2011–12, children 9–12 years old**

|                          | Females                 |           |                            |           |             |                          |  |  | Males                   |           |                            |           |             |                          |  |  | Persons                 |           |                            |           |             |                          |  |  |
|--------------------------|-------------------------|-----------|----------------------------|-----------|-------------|--------------------------|--|--|-------------------------|-----------|----------------------------|-----------|-------------|--------------------------|--|--|-------------------------|-----------|----------------------------|-----------|-------------|--------------------------|--|--|
|                          | 2007<br>Median<br>[IQR] |           | 2011–12<br>Median<br>[IQR] |           | Δ<br>Median | p-<br>value <sup>a</sup> |  |  | 2007<br>Median<br>[IQR] |           | 2011–12<br>Median<br>[IQR] |           | Δ<br>Median | p-<br>value <sup>a</sup> |  |  | 2007<br>Median<br>[IQR] |           | 2011–12<br>Median<br>[IQR] |           | Δ<br>Median | p-<br>value <sup>a</sup> |  |  |
| <b>Food</b>              | <i>n</i>                |           | <i>n</i>                   |           |             |                          |  |  | <i>n</i>                |           | <i>n</i>                   |           |             |                          |  |  | <i>n</i>                |           | <i>n</i>                   |           |             |                          |  |  |
| Sweet pie/pastry         | 52                      | 63 [57]   | 21                         | 85 [68]   | 22          | 0.014                    |  |  | 42                      | 80 [74]   | 28                         | 67 [40]   | -13         | 0.54                     |  |  | 94                      | 75 [64]   | 49                         | 67 [60]   | -8          | 0.20                     |  |  |
| Other desserts           | 49                      | 137 [60]  | 25                         | 95 [110]  | -42         | 0.043                    |  |  | 35                      | 113 [50]  | 16                         | 100 [89]  | -13         | 0.12                     |  |  | 84                      | 128 [54]  | 41                         | 100 [90]  | -28         | 0.0078                   |  |  |
| Plain sweet biscuits     | 104                     | 20 [17]   | 74                         | 23 [18]   | 3           | 0.032                    |  |  | 75                      | 25 [22]   | 71                         | 30 [16]   | 5           | 0.40                     |  |  | 179                     | 22 [18]   | 145                        | 25 [17]   | 3           | 0.012                    |  |  |
| Cream/chocolate biscuits | 77                      | 25 [16]   | 39                         | 24 [23]   | -1          | 0.53                     |  |  | 86                      | 25 [18]   | 42                         | 25 [15]   | 0           | 0.93                     |  |  | 163                     | 25 [17]   | 81                         | 25 [17]   | 0           | 0.65                     |  |  |
| Savoury biscuits         | 169                     | 18 [13]   | 83                         | 25 [22]   | 7           | 0.0025                   |  |  | 127                     | 24 [12]   | 81                         | 25 [23]   | 1           | 0.23                     |  |  | 296                     | 20 [13]   | 164                        | 25 [23]   | 5           | 0.0017                   |  |  |
| Snack noodles            | 35                      | 131 [94]  | 17                         | 145 [240] | 14          | 0.0024                   |  |  | 38                      | 136 [125] | 18                         | 263 [240] | 127         | 0.0046                   |  |  | 73                      | 136 [84]  | 35                         | 204 [240] | 68          | 0.0000                   |  |  |
| Muesli bars              | 71                      | 31 [11]   | 55                         | 31 [0]    | 0           | 0.50                     |  |  | 72                      | 31 [11]   | 59                         | 31 [5]    | 0           | 0.18                     |  |  | 143                     | 31 [11]   | 114                        | 31 [1]    | 0           | 0.15                     |  |  |
| <b>Main Meals</b>        |                         |           |                            |           |             |                          |  |  |                         |           |                            |           |             |                          |  |  |                         |           |                            |           |             |                          |  |  |
| Mince Dish               | 80                      | 140 [148] | 41                         | 192 [349] | 52          | 0.13                     |  |  | 83                      | 128 [135] | 43                         | 312 [372] | 184         | 0.0000                   |  |  | 163                     | 138 [140] | 84                         | 275 [374] | 137         | 0.0000                   |  |  |
| Mixed meat dish          | 14                      | 126 [316] | 20                         | 152 [93]  | 26          | 0.94                     |  |  | 8                       | 210 [232] | 24                         | 272 [127] | 62          | 0.60                     |  |  | 22                      | 154 [284] | 44                         | 204 [208] | 50          | 0.85                     |  |  |
| Plain Meat               | 88                      | 86 [86]   | 32                         | 118 [74]  | 32          | 0.0058                   |  |  | 95                      | 84 [88]   | 33                         | 127 [99]  | 43          | 0.0007                   |  |  | 183                     | 84 [85]   | 65                         | 123 [70]  | 39          | 0.0000                   |  |  |
| Mixed chicken dish       | 30                      | 100 [157] | 27                         | 215 [214] | 115         | 0.59                     |  |  | 24                      | 127 [120] | 25                         | 258 [137] | 131         | 0.0011                   |  |  | 54                      | 107 [157] | 52                         | 226 [187] | 119         | 0.0054                   |  |  |
| Crumbed Chicken          | 61                      | 72 [65]   | 35                         | 96 [74]   | 24          | 0.11                     |  |  | 43                      | 109 [72]  | 32                         | 134 [96]  | 25          | 0.038                    |  |  | 104                     | 90 [81]   | 67                         | 114 [92]  | 24          | 0.0081                   |  |  |
| Plain Chicken            | 99                      | 78 [78]   | 34                         | 75 [45]   | -3          | 0.30                     |  |  | 95                      | 95 [85]   | 20                         | 168 [112] | 73          | 0.0069                   |  |  | 194                     | 84 [90]   | 54                         | 105 [115] | 21          | 0.035                    |  |  |
| Fish                     | 29                      | 95 [76]   | 21                         | 83 [53]   | -12         | 0.89                     |  |  | 27                      | 115 [131] | 17                         | 124 [126] | 9           | 0.28                     |  |  | 56                      | 101 [74]  | 38                         | 110 [78]  | 9           | 0.64                     |  |  |
| Soup                     | 45                      | 300 [166] | 25                         | 340 [303] | 40          | 0.56                     |  |  | 31                      | 260 [338] | 18                         | 326 [206] | 66          | 0.36                     |  |  | 76                      | 287 [273] | 43                         | 333 [308] | 46          | 0.33                     |  |  |
| Sausages                 | 68                      | 58 [73]   | 24                         | 108 [89]  | 50          | 0.0000                   |  |  | 71                      | 72 [55]   | 33                         | 94 [89]   | 22          | 0.0005                   |  |  | 139                     | 58 [67]   | 57                         | 101 [89]  | 43          | 0.0000                   |  |  |
| Hamburger                | 22                      | 158 [91]  | 23                         | 185 [125] | 27          | 0.25                     |  |  | 32                      | 193 [92]  | 21                         | 185 [53]  | -8          | 0.57                     |  |  | 54                      | 186 [97]  | 44                         | 185 [112] | -1          | 0.29                     |  |  |
| Pizza                    | 48                      | 110 [97]  | 19                         | 204 [193] | 94          | 0.0029                   |  |  | 37                      | 164 [155] | 24                         | 204 [108] | 40          | 0.19                     |  |  | 85                      | 132 [134] | 43                         | 204 [168] | 72          | 0.0006                   |  |  |
| Pie                      | 54                      | 140 [65]  | 20                         | 84 [132]  | -56         | 0.14                     |  |  | 64                      | 170 [49]  | 35                         | 130 [95]  | -40         | 0.21                     |  |  | 118                     | 165 [57]  | 55                         | 130 [99]  | -35         | 0.069                    |  |  |
| <b>Other Foods</b>       |                         |           |                            |           |             |                          |  |  |                         |           |                            |           |             |                          |  |  |                         |           |                            |           |             |                          |  |  |
| Chips (not potato)       | 61                      | 22 [30]   | 46                         | 23 [10]   | 1           | 0.07                     |  |  | 60                      | 20 [30]   | 45                         | 22 [23]   | 2           | 0.82                     |  |  | 121                     | 21 [32]   | 91                         | 22 [13]   | 1           | 0.16                     |  |  |

**Table S3c: portion size changes (grams) between ANCNPAS 2007 and the NNPAS 2011–12, children 9–12 years old**

|                            | Females                 |          |                            |           |                    |                             | Males                   |           |                            |           | Persons            |                             |                         |          |                            |           |                    |                             |
|----------------------------|-------------------------|----------|----------------------------|-----------|--------------------|-----------------------------|-------------------------|-----------|----------------------------|-----------|--------------------|-----------------------------|-------------------------|----------|----------------------------|-----------|--------------------|-----------------------------|
|                            | 2007<br>Median<br>[IQR] |          | 2011–12<br>Median<br>[IQR] |           | $\Delta$<br>Median | $p$ -<br>value <sup>a</sup> | 2007<br>Median<br>[IQR] |           | 2011–12<br>Median<br>[IQR] |           | $\Delta$<br>Median | $p$ -<br>value <sup>a</sup> | 2007<br>Median<br>[IQR] |          | 2011–12<br>Median<br>[IQR] |           | $\Delta$<br>Median | $p$ -<br>value <sup>a</sup> |
| Food                       | <i>n</i>                |          | <i>n</i>                   |           |                    |                             | <i>n</i>                |           | <i>n</i>                   |           |                    |                             | <i>n</i>                |          | <i>n</i>                   |           |                    |                             |
| Potato crisps              | 107                     | 21 [9]   | 60                         | 21 [25]   | 0                  | 0.31                        | 119                     | 21 [21]   | 70                         | 21 [5]    | 0                  | 0.019                       | 226                     | 21 [14]  | 130                        | 21 [20]   | 0                  | 0.31                        |
| Ice block - cream          | 29                      | 65 [8]   | 21                         | 80 [5]    | 15                 | 0.0003                      | 30                      | 68 [36]   | 23                         | 80 [9]    | 12                 | 0.18                        | 59                      | 68 [50]  | 44                         | 80 [8]    | 12                 | 0.0007                      |
| Ice block - water          | 35                      | 75 [8]   | 35                         | 75 [0]    | 0                  | 0.78                        | 33                      | 76 [10]   | 30                         | 75 [0]    | -1                 | 0.52                        | 68                      | 76 [6]   | 65                         | 75 [0]    | -1                 | 0.79                        |
| Chocolate                  | 182                     | 18 [24]  | 79                         | 24 [37]   | 6                  | 0.24                        | 171                     | 20 [31]   | 74                         | 25 [32]   | 5                  | 0.59                        | 353                     | 20 [27]  | 153                        | 25 [35]   | 5                  | 0.20                        |
| Lollies                    | 139                     | 16 [23]  | 60                         | 15 [16]   | -1                 | 0.30                        | 131                     | 16 [25]   | 58                         | 15 [18]   | -1                 | 0.78                        | 270                     | 16 [23]  | 118                        | 15 [15]   | 9                  | 0.35                        |
| Salad dressing<br>full fat | 43                      | 9 [15]   | 28                         | 17 [8]    | 8                  | 0.0003                      | 40                      | 11 [15]   | 28                         | 14 [7]    | 3                  | 0.0088                      | 83                      | 10 [14]  | 56                         | 14 [7]    | 4                  | 0.0000                      |
| Jam/Honey                  | 104                     | 12 [14]  | 37                         | 14 [19]   | 2                  | 0.25                        | 89                      | 14 [17]   | 45                         | 11 [19]   | -3                 | 0.68                        | 193                     | 13 [16]  | 82                         | 12 [19]   | -1                 | 0.28                        |
| Peanut butter              | 76                      | 10 [13]  | 32                         | 9 [2]     | -1                 | 0.15                        | 86                      | 12 [11]   | 43                         | 13 [16]   | 1                  | 0.57                        | 12                      | 12 [13]  | 75                         | 10 [9]    | -2                 | 0.63                        |
| Vegemite                   | 140                     | 5 [4]    | 59                         | 6 [4]     | 1                  | 0.021                       | 93                      | 5 [3]     | 84                         | 6 [4]     | 1                  | 0.89                        | 233                     | 5 [4]    | 143                        | 6 [4]     | 1                  | 0.17                        |
| Tomato Sauce               | 160                     | 13 [16]  | 52                         | 14 [7]    | 1                  | 0.10                        | 166                     | 11 [16]   | 63                         | 17 [14]   | 6                  | 0.0062                      | 326                     | 13 [16]  | 115                        | 14 [9]    | 1                  | 0.0012                      |
| Devon, salami              | 31                      | 25 [32]  | 15                         | 45 [22]   | 20                 | 0.32                        | 38                      | 25 [12]   | 19                         | 28 [33]   | 3                  | 0.044                       | 69                      | 25 [21]  | 34                         | 28 [23]   | 3                  | 0.025                       |
| Bacon/Ham                  | 107                     | 30 [30]  | 69                         | 17 [15]   | -13                | 0.0001                      | 99                      | 30 [25]   | 63                         | 17 [17]   | -13                | 0.0043                      | 206                     | 30 [26]  | 132                        | 17 [17]   | -13                | 0.0000                      |
| Eggs                       | 60                      | 43 [39]  | 39                         | 49 [28]   | 6                  | 0.17                        | 67                      | 50 [41]   | 30                         | 51 [44]   | 1                  | 0.11                        | 127                     | 49 [41]  | 69                         | 49 [42]   | 0                  | 0.049                       |
| Fruit and<br>Vegetables    |                         |          |                            |           |                    |                             |                         |           |                            |           |                    |                             |                         |          |                            |           |                    |                             |
| Hot Chips                  | 114                     | 100 [75] | 61                         | 70 [50]   | -30                | 0.0000                      | 103                     | 110 [75]  | 56                         | 93 [98]   | -17                | 0.032                       | 217                     | 104 [75] | 117                        | 72 [64]   | -32                | 0.0000                      |
| Potato                     | 131                     | 107 [73] | 45                         | 111 [116] | 4                  | 0.72                        | 118                     | 110 [118] | 57                         | 123 [103] | 13                 | 0.57                        | 249                     | 110 [84] | 102                        | 122 [116] | 12                 | 0.39                        |
| Broccoli                   | 73                      | 30 [24]  | 14                         | 62 [88]   | 32                 | 0.0027                      | 57                      | 30 [31]   | 17                         | 29 [28]   | -1                 | 0.48                        | 130                     | 30 [30]  | 31                         | 38 [58]   | 8                  | 0.16                        |
| Carrots                    | 183                     | 29 [26]  | 46                         | 35 [92]   | 6                  | 0.042                       | 145                     | 29 [29]   | 44                         | 35 [63]   | 6                  | 0.0083                      | 328                     | 29 [27]  | 90                         | 35 [82]   | 6                  | 0.0011                      |
| Tomato                     | 129                     | 60 [40]  | 44                         | 29 [9]    | -31                | 0.0000                      | 97                      | 60 [40]   | 30                         | 30 [39]   | -30                | 0.039                       | 226                     | 60 [40]  | 74                         | 29 [22]   | -31                | 0.0000                      |
| Lettuce                    | 106                     | 15 [21]  | 37                         | 12 [0]    | -3                 | 0.11                        | 74                      | 16 [21]   | 30                         | 13 [12]   | -3                 | 0.65                        | 180                     | 15 [21]  | 67                         | 12 [12]   | -3                 | 0.13                        |
| Celery/Cucumber            | 82                      | 25 [22]  | 31                         | 30 [89]   | 5                  | 0.039                       | 57                      | 25 [20]   | 17                         | 30 [89]   | 5                  | 0.054                       | 139                     | 25 [21]  | 48                         | 30 [89]   | 5                  | 0.0042                      |
| Apple                      | 244                     | 166 [58] | 115                        | 164 [20]  | -2                 | 0.69                        | 178                     | 166 [57]  | 161                        | 164 [20]  | -2                 | 0.40                        | 422                     | 166 [58] | 276                        | 164 [20]  | -2                 | 0.89                        |
| Orange                     | 104                     | 86 [59]  | 68                         | 75 [63]   | -11                | 0.77                        | 77                      | 86 [52]   | 53                         | 101 [56]  | 15                 | 0.46                        | 181                     | 86 [59]  | 121                        | 75 [56]   | -11                | 0.48                        |

**Table S3c: portion size changes (grams) between ANCNPAS 2007 and the NNPAS 2011–12, children 9–12 years old**

|                                     | Females                 |           |                            |           |                    |                         | Males                   |           |                            |           | Persons            |                         |                         |           |                            |           |                    |                         |
|-------------------------------------|-------------------------|-----------|----------------------------|-----------|--------------------|-------------------------|-------------------------|-----------|----------------------------|-----------|--------------------|-------------------------|-------------------------|-----------|----------------------------|-----------|--------------------|-------------------------|
|                                     | 2007<br>Median<br>[IQR] |           | 2011–12<br>Median<br>[IQR] |           | $\Delta$<br>Median | $p$ -value <sup>a</sup> | 2007<br>Median<br>[IQR] |           | 2011–12<br>Median<br>[IQR] |           | $\Delta$<br>Median | $p$ -value <sup>a</sup> | 2007<br>Median<br>[IQR] |           | 2011–12<br>Median<br>[IQR] |           | $\Delta$<br>Median | $p$ -value <sup>a</sup> |
| Food                                | <i>n</i>                |           | <i>n</i>                   |           |                    |                         | <i>n</i>                |           | <i>n</i>                   |           |                    |                         | <i>n</i>                |           | <i>n</i>                   |           |                    |                         |
| Banana                              | 105                     | 121 [27]  | 50                         | 98 [13]   | -23                | 0.0046                  | 91                      | 121 [27]  | 43                         | 98 [13]   | -23                | 0.0044                  | 196                     | 121 [27]  | 93                         | 98 [13]   | -23                | 0.0001                  |
| Seasonal Fruit                      |                         |           |                            |           |                    |                         |                         |           |                            |           |                    |                         |                         |           |                            |           |                    |                         |
| Peach, nectarin,<br>plum or apricot | 16                      | 87 [85]   | 32                         | 151 [6]   | 64                 | 0.014                   | 12                      | 132 [82]  | 19                         | 145 [76]  | 13                 | 0.57                    | 28                      | 116 [85]  | 51                         | 151 [19]  | 35                 | 0.032                   |
| Mixed<br>Berries/Grapes             | 58                      | 83 [91]   | 51                         | 60 [100]  | -23                | 0.46                    | 44                      | 84 [94]   | 40                         | 43 [83]   | -41                | 0.0091                  | 102                     | 84 [85]   | 91                         | 50 [74]   | -34                | 0.020                   |
| Melon                               | 33                      | 161 [174] | 26                         | 150 [144] | -11                | 0.82                    | 28                      | 177 [241] | 13                         | 300 [170] | 123                | 0.49                    | 61                      | 161 [211] | 39                         | 160 [219] | -1                 | 0.89                    |

<sup>a</sup> $p$ -values without Bonferroni correction

**Table S3d: portion size changes (grams) between ANCNPAS 2007 and the NNPAS 2011–12, children 13–16 years old**

|                    | Females                 |           |                            |           |             |                          |                         |           |                            |            |             |                          | Males                   |           |                            |           | Persons     |                          |  |  |  |  |  |  |
|--------------------|-------------------------|-----------|----------------------------|-----------|-------------|--------------------------|-------------------------|-----------|----------------------------|------------|-------------|--------------------------|-------------------------|-----------|----------------------------|-----------|-------------|--------------------------|--|--|--|--|--|--|
|                    | 2007<br>Median<br>[IQR] |           | 2011–12<br>Median<br>[IQR] |           | Δ<br>Median | p-<br>value <sup>a</sup> | 2007<br>Median<br>[IQR] |           | 2011–12<br>Median<br>[IQR] |            | Δ<br>Median | p-<br>value <sup>a</sup> | 2007<br>Median<br>[IQR] |           | 2011–12<br>Median<br>[IQR] |           | Δ<br>Median | p-<br>value <sup>a</sup> |  |  |  |  |  |  |
| Food               | n                       |           | n                          |           |             |                          | n                       |           | n                          |            |             |                          | n                       |           | n                          |           |             |                          |  |  |  |  |  |  |
| Drinks             |                         |           |                            |           |             |                          |                         |           |                            |            |             |                          |                         |           |                            |           |             |                          |  |  |  |  |  |  |
| Diet soft drink    | 61                      | 375 [138] | 24                         | 375 [105] | 0           | 0.85                     | 84                      | 375 [75]  | 28                         | 375 [0]    | 0           | 0.21                     | 145                     | 375 [125] | 52                         | 375 [23]  | 0           | 0.53                     |  |  |  |  |  |  |
| Soft Drink         | 301                     | 340 [178] | 133                        | 364 [130] | 24          | 0.78                     | 397                     | 391 [187] | 194                        | 390 [234]  | -1          | 0.92                     | 698                     | 391 [156] | 327                        | 390 [208] | -1          | 0.94                     |  |  |  |  |  |  |
| Water              | 1594                    | 300 [335] | 458                        | 450 [710] | 150         | 0.0000                   | 1564                    | 300 [370] | 444                        | 500 [1020] | 200         | 0.0000                   | 3158                    | 300 [380] | 902                        | 500 [710] | 200         | 0.0000                   |  |  |  |  |  |  |
| Fruit Juice        | 425                     | 262 [52]  | 143                        | 263 [158] | 1           | 0.0000                   | 401                     | 262 [81]  | 150                        | 272 [118]  | 10          | 0.0039                   | 826                     | 262 [105] | 293                        | 270 [108] | 8           | 0.0000                   |  |  |  |  |  |  |
| Tea or coffee      | 193                     | 240 [28]  | 91                         | 220 [50]  | -20         | 0.14                     | 159                     | 260 [54]  | 56                         | 220 [66]   | -40         | 0.0000                   | 352                     | 240 [37]  | 147                        | 220 [50]  | -20         | 0.0000                   |  |  |  |  |  |  |
| Dairy Foods        |                         |           |                            |           |             |                          |                         |           |                            |            |             |                          |                         |           |                            |           |             |                          |  |  |  |  |  |  |
| Whole Milk         | 357                     | 206 [176] | 142                        | 206 [227] | 0           | 0.86                     | 553                     | 258 [214] | 215                        | 258 [211]  | 0           | 0.012                    | 910                     | 258 [194] | 357                        | 258 [237] | 0           | 0.043                    |  |  |  |  |  |  |
| Reduced Fat Milk   | 196                     | 175 [196] | 84                         | 195 [177] | 20          | 0.10                     | 216                     | 258 [231] | 73                         | 208 [208]  | -50         | 0.068                    | 412                     | 237 [216] | 157                        | 208 [177] | -29         | 0.77                     |  |  |  |  |  |  |
| Flavoured Milk     | 138                     | 278 [142] | 49                         | 432 [265] | 154         | 0.0002                   | 130                     | 353 [267] | 56                         | 346 [274]  | -7          | 0.68                     | 268                     | 307 [242] | 105                        | 386 [265] | 79          | 0.0027                   |  |  |  |  |  |  |
| Ice cream          | 107                     | 112 [112] | 49                         | 97 [95]   | -15         | 0.60                     | 136                     | 112 [106] | 54                         | 132 [120]  | 20          | 0.030                    | 243                     | 112 [108] | 103                        | 132 [111] | 20          | 0.25                     |  |  |  |  |  |  |
| Yoghurt            | 108                     | 150 [114] | 43                         | 130 [138] | -20         | 0.23                     | 79                      | 200 [159] | 32                         | 113 [86]   | -87         | 0.055                    | 187                     | 156 [100] | 75                         | 123 [105] | -33         | 0.034                    |  |  |  |  |  |  |
| Cheese             | 330                     | 22 [25]   | 52                         | 25 [6]    | 3           | 0.54                     | 297                     | 33 [25]   | 86                         | 25 [21]    | -8          | 0.24                     | 627                     | 23 [25]   | 138                        | 25 [12]   | 2           | 0.48                     |  |  |  |  |  |  |
| Breads and Cereals |                         |           |                            |           |             |                          |                         |           |                            |            |             |                          |                         |           |                            |           |             |                          |  |  |  |  |  |  |
| Breakfast Cereal   | 214                     | 45 [38]   | 91                         | 45 [23]   | 0           | 0.35                     | 385                     | 60 [45]   | 151                        | 51 [50]    | -9          | 0.0044                   | 599                     | 60 [40]   | 242                        | 51 [38]   | -9          | 0.0015                   |  |  |  |  |  |  |
| White Bread        | 468                     | 64 [34]   | 173                        | 64 [16]   | 0           | 0.86                     | 582                     | 66 [20]   | 255                        | 64 [22]    | -2          | 0.018                    | 1050                    | 64 [21]   | 428                        | 64 [18]   | 0           | 0.094                    |  |  |  |  |  |  |
| Mixed Grain Bread  | 110                     | 68 [29]   | 33                         | 60 [12]   | -8          | 0.41                     | 84                      | 68 [28]   | 24                         | 72 [12]    | 4           | 0.72                     | 194                     | 68 [22]   | 57                         | 72 [12]   | 4           | 0.66                     |  |  |  |  |  |  |
| Wholemeal Bread    | 132                     | 64 [31]   | 59                         | 64 [13]   | 0           | 0.85                     | 114                     | 68 [16]   | 33                         | 66 [10]    | -2          | 0.99                     | 246                     | 64 [26]   | 92                         | 66 [13]   | 2           | 0.62                     |  |  |  |  |  |  |
| Rice               | 117                     | 190 [186] | 60                         | 168 [121] | -22         | 0.04                     | 125                     | 247 [237] | 61                         | 201 [256]  | -46         | 0.17                     | 242                     | 216 [224] | 121                        | 184 [111] | -32         | 0.013                    |  |  |  |  |  |  |
| Pasta              | 151                     | 210 [168] | 74                         | 298 [266] | 88          | 0.0004                   | 162                     | 253 [182] | 68                         | 312 [208]  | 59          | 0.0000                   | 313                     | 225 [152] | 142                        | 312 [239] | 87          | 0.0000                   |  |  |  |  |  |  |

**Table S3d: portion size changes (grams) between ANCNPAS 2007 and the NNPAS 2011–12, children 13–16 years old**

|                          | Table 1: Mean and median consumption of food and drink (g/day) by sex and age group |           |                            |           |             |                          |                         |           |                            |           |             |                          |                         |           |                            |           |             |                          |  |  |  |  |  |  |
|--------------------------|-------------------------------------------------------------------------------------|-----------|----------------------------|-----------|-------------|--------------------------|-------------------------|-----------|----------------------------|-----------|-------------|--------------------------|-------------------------|-----------|----------------------------|-----------|-------------|--------------------------|--|--|--|--|--|--|
|                          | Females                                                                             |           |                            |           |             |                          |                         |           | Males                      |           |             |                          |                         |           |                            |           | Persons     |                          |  |  |  |  |  |  |
|                          | 2007<br>Median<br>[IQR]                                                             |           | 2011–12<br>Median<br>[IQR] |           | Δ<br>Median | p-<br>value <sup>a</sup> | 2007<br>Median<br>[IQR] |           | 2011–12<br>Median<br>[IQR] |           | Δ<br>Median | p-<br>value <sup>a</sup> | 2007<br>Median<br>[IQR] |           | 2011–12<br>Median<br>[IQR] |           | Δ<br>Median | p-<br>value <sup>a</sup> |  |  |  |  |  |  |
| Food                     | n                                                                                   |           | n                          |           |             |                          | n                       |           | n                          |           |             |                          | n                       |           | n                          |           |             |                          |  |  |  |  |  |  |
| Sweets and Snacks        |                                                                                     |           |                            |           |             |                          |                         |           |                            |           |             |                          |                         |           |                            |           |             |                          |  |  |  |  |  |  |
| Cakes                    | 210                                                                                 | 72 [80]   | 92                         | 85 [82]   | 13          | 0.25                     | 193                     | 80 [81]   | 64                         | 132 [90]  | 52          | 0.0001                   | 403                     | 76 [80]   | 156                        | 110 [103] | 34          | 0.0006                   |  |  |  |  |  |  |
| Sweet pie/pastry         | 50                                                                                  | 67 [61]   | 27                         | 80 [39]   | 13          | 0.64                     | 53                      | 80 [70]   | 34                         | 67 [46]   | 13          | 0.21                     | 103                     | 75 [72]   | 61                         | 76 [47]   | 1           | 0.58                     |  |  |  |  |  |  |
| Other desserts           | 48                                                                                  | 115 [105] | 18                         | 129 [80]  | 14          | 0.97                     | 37                      | 150 [130] | 18                         | 121 [125] | -29         | 0.30                     | 85                      | 140 [105] | 36                         | 121 [5]   | -19         | 0.51                     |  |  |  |  |  |  |
| Plain sweet biscuits     | 104                                                                                 | 22 [22]   | 49                         | 26 [19]   | 4           | 0.25                     | 106                     | 28 [24]   | 50                         | 34 [34]   | 6           | 0.95                     | 210                     | 24 [24]   | 99                         | 30 [29]   | 6           | 0.45                     |  |  |  |  |  |  |
| Cream/chocolate biscuits | 89                                                                                  | 23 [22]   | 36                         | 22 [32]   | -1          | 0.85                     | 116                     | 28 [21]   | 37                         | 28 [32]   | 0           | 0.80                     | 205                     | 25 [21]   | 73                         | 25 [32]   | 0           | 0.95                     |  |  |  |  |  |  |
| Savoury biscuits         | 154                                                                                 | 24 [20]   | 77                         | 25 [35]   | 1           | 0.50                     | 127                     | 25 [23]   | 65                         | 28 [55]   | 3           | 0.19                     | 281                     | 25 [20]   | 142                        | 25 [48]   | 0           | 0.18                     |  |  |  |  |  |  |
| Snack noodles            | 54                                                                                  | 169 [125] | 17                         | 145 [240] | -24         | 0.27                     | 49                      | 170 [125] | 24                         | 166 [145] | -4          | 0.49                     | 103                     | 169 [125] | 41                         | 145 [240] | -24         | 0.20                     |  |  |  |  |  |  |
| Muesli bars              | 112                                                                                 | 31 [10]   | 53                         | 31 [3]    | 0           | 0.11                     | 123                     | 31 [11]   | 65                         | 31 [2]    | 0           | 0.68                     | 235                     | 31 [11]   | 118                        | 31 [2]    | 0           | 0.18                     |  |  |  |  |  |  |
| Main Meals               |                                                                                     |           |                            |           |             |                          |                         |           |                            |           |             |                          |                         |           |                            |           |             |                          |  |  |  |  |  |  |
| Mince Dish               | 97                                                                                  | 92 [142]  | 51                         | 218 [270] | 126         | 0.0000                   | 121                     | 170 [175] | 46                         | 280 [320] | 110         | 0.034                    | 218                     | 140 [180] | 97                         | 260 [286] | 120         | 0.0000                   |  |  |  |  |  |  |
| Mixed meat dish          | 24                                                                                  | 190 [163] | 20                         | 237 [171] | 47          | 0.16                     | 20                      | 253 [316] | 19                         | 243 [358] | -10         | 0.93                     | 44                      | 243 [167] | 39                         | 243 [231] | 0           | 0.31                     |  |  |  |  |  |  |
| Plain Meat               | 141                                                                                 | 80 [78]   | 54                         | 142 [87]  | 62          | 0.0000                   | 159                     | 104 [98]  | 55                         | 183 [84]  | 79          | 0.0000                   | 300                     | 88 [84]   | 109                        | 150 [94]  | 62          | 0.0000                   |  |  |  |  |  |  |
| Crumbed Chicken          | 61                                                                                  | 99 [89]   | 32                         | 109 [104] | 10          | 0.86                     | 77                      | 143 [135] | 37                         | 130 [56]  | -13         | 0.84                     | 138                     | 117 [130] | 69                         | 114 [87]  | -3          | 0.91                     |  |  |  |  |  |  |
| Plain Chicken            | 130                                                                                 | 101 [86]  | 45                         | 114 [93]  | 13          | 0.060                    | 163                     | 120 [108] | 39                         | 114 [128] | -6          | 0.76                     | 293                     | 107 [100] | 84                         | 114 [105] | 7           | 0.17                     |  |  |  |  |  |  |
| Sausages                 | 59                                                                                  | 58 [48]   | 25                         | 89 [28]   | 31          | 0.077                    | 98                      | 82 [57]   | 31                         | 156 [89]  | 74          | 0.0000                   | 157                     | 64 [57]   | 56                         | 101 [89]  | 37          | 0.0000                   |  |  |  |  |  |  |
| Hamburger                | 46                                                                                  | 191 [113] | 37                         | 185 [63]  | -6          | 0.78                     | 42                      | 203 [124] | 60                         | 206 [113] | 3           | 0.087                    | 88                      | 201 [123] | 97                         | 196 [118] | -5          | 0.072                    |  |  |  |  |  |  |
| Pizza                    | 56                                                                                  | 142 [166] | 29                         | 175 [175] | 33          | 0.13                     | 87                      | 225 [184] | 41                         | 188 [264] | -37         | 0.40                     | 143                     | 174 [193] | 70                         | 186 [256] | 12          | 0.98                     |  |  |  |  |  |  |
| Pie                      | 75                                                                                  | 140 [64]  | 27                         | 175 [45]  | 35          | 0.019                    | 106                     | 174 [60]  | 48                         | 175 [45]  | 1           | 0.83                     | 181                     | 170 [60]  | 75                         | 175 [45]  | 5           | 0.15                     |  |  |  |  |  |  |
| Other Foods              |                                                                                     |           |                            |           |             |                          |                         |           |                            |           |             |                          |                         |           |                            |           |             |                          |  |  |  |  |  |  |
| Chips (not potato)       | 75                                                                                  | 28 [30]   | 35                         | 20 [28]   | -8          | 0.012                    | 58                      | 50 [40]   | 34                         | 25 [49]   | -25         | 0.16                     | 133                     | 30 [36]   | 69                         | 25 [29]   | -5          | 0.008                    |  |  |  |  |  |  |

**Table S3d: portion size changes (grams) between ANCNPAS 2007 and the NNPAS 2011–12, children 13–16 years old**

|                            | Females                 |           |                            |          |             |                          |                         |           |                            |           |             |                          | Males                   |           |                            |           | Persons     |                          |  |  |
|----------------------------|-------------------------|-----------|----------------------------|----------|-------------|--------------------------|-------------------------|-----------|----------------------------|-----------|-------------|--------------------------|-------------------------|-----------|----------------------------|-----------|-------------|--------------------------|--|--|
|                            | 2007<br>Median<br>[IQR] |           | 2011–12<br>Median<br>[IQR] |          | Δ<br>Median | p-<br>value <sup>a</sup> | 2007<br>Median<br>[IQR] |           | 2011–12<br>Median<br>[IQR] |           | Δ<br>Median | p-<br>value <sup>a</sup> | 2007<br>Median<br>[IQR] |           | 2011–12<br>Median<br>[IQR] |           | Δ<br>Median | p-<br>value <sup>a</sup> |  |  |
| Food                       | n                       |           | n                          |          |             |                          | n                       |           | n                          |           |             |                          | n                       |           | n                          |           |             |                          |  |  |
| Potato crisps              | 145                     | 21 [29]   | 17                         | 78 [4]   | 57          | 0.47                     | 147                     | 21 [29]   | 61                         | 42 [26]   | 21          | 0.99                     | 292                     | 21 [29]   | 106                        | 21 [26]   | 0           | 0.70                     |  |  |
| Chocolate                  | 237                     | 24 [29]   | 77                         | 25 [40]  | 1           | 0.55                     | 177                     | 30 [37]   | 68                         | 31 [38]   | 1           | 0.98                     | 414                     | 26 [34]   | 145                        | 25 [40]   | -1          | 0.55                     |  |  |
| Lollies                    | 176                     | 15 [22]   | 62                         | 15 [19]  | 0           | 0.71                     | 149                     | 28 [29]   | 39                         | 21 [26]   | -7          | 0.05                     | 325                     | 18 [30]   | 101                        | 17 [22]   | -1          | 0.19                     |  |  |
| Salad dressing<br>full fat | 74                      | 10 [15]   | 27                         | 21 [8]   | 11          | 0.0018                   | 84                      | 10 [15]   | 42                         | 14 [7]    | 4           | 0.0014                   | 158                     | 10 [15]   | 69                         | 20 [7]    | 10          | 0.0000                   |  |  |
| Jam/Honey                  | 151                     | 13 [19]   | 42                         | 11 [21]  | -2          | 0.69                     | 130                     | 14 [18]   | 52                         | 17 [31]   | 3           | 0.071                    | 281                     | 13 [19]   | 94                         | 14 [21]   | 1           | 0.21                     |  |  |
| Peanut butter              | 90                      | 12 [13]   | 36                         | 10 [11]  | -2          | 0.95                     | 115                     | 19 [13]   | 44                         | 10 [10]   | -9          | 0.0096                   | 205                     | 13 [15]   | 80                         | 10 [10]   | -3          | 0.057                    |  |  |
| Vegemite                   | 162                     | 6 [4]     | 49                         | 6 [4]    | 0           | 0.012                    | 112                     | 8 [5]     | 48                         | 6 [6]     | -2          | 0.38                     | 274                     | 6 [6]     | 97                         | 6 [4]     | 0           | 0.035                    |  |  |
| Tomato Sauce               | 191                     | 22 [17]   | 56                         | 14 [28]  | -8          | 0.086                    | 253                     | 22 [20]   | 86                         | 14 [14]   | -8          | 0.57                     | 444                     | 22 [18]   | 142                        | 14 [19]   | -8          | 0.12                     |  |  |
| Bacon/Ham                  | 160                     | 27 [22]   | 69                         | 26 [31]  | -1          | 0.90                     | 175                     | 40 [35]   | 82                         | 25 [31]   | -15         | 0.0001                   | 335                     | 36 [33]   | 151                        | 25 [31]   | -11         | 0.0061                   |  |  |
| Eggs                       | 108                     | 43 [54]   | 42                         | 49 [47]  | 6           | 0.074                    | 91                      | 43 [49]   | 45                         | 51 [34]   | 8           | 0.0060                   | 199                     | 43 [55]   | 87                         | 51 [34]   | 8           | 0.0013                   |  |  |
| Fruit and<br>Vegetables    |                         |           |                            |          |             |                          |                         |           |                            |           |             |                          |                         |           |                            |           |             |                          |  |  |
| Hot Chips                  | 187                     | 112 [75]  | 66                         | 75 [70]  | -37         | 0.0005                   | 168                     | 144 [41]  | 61                         | 104 [71]  | -40         | 0.0003                   | 355                     | 133 [51]  | 127                        | 100 [71]  | -33         | 0.0000                   |  |  |
| Potato                     | 165                     | 111 [100] | 64                         | 119 [99] | 8           | 0.75                     | 166                     | 146 [124] | 47                         | 123 [155] | -23         | 0.50                     | 331                     | 122 [121] | 111                        | 122 [118] | 0           | 0.49                     |  |  |
| Carrots                    | 230                     | 29 [30]   | 40                         | 37 [61]  | 8           | 0.30                     | 200                     | 34 [25]   | 47                         | 37 [77]   | 3           | 0.63                     | 430                     | 31 [30]   | 87                         | 37 [63]   | 8           | 0.23                     |  |  |
| Tomato                     | 147                     | 60 [53]   | 43                         | 29 [51]  | -31         | 0.0000                   | 154                     | 63 [55]   | 36                         | 37 [29]   | -26         | 0.0001                   | 301                     | 60 [55]   | 79                         | 30 [29]   | -30         | 0.0000                   |  |  |
| Lettuce                    | 138                     | 16 [16]   | 31                         | 13 [16]  | -3          | 0.088                    | 161                     | 16 [20]   | 56                         | 13 [13]   | -3          | 0.10                     | 299                     | 16 [20]   | 87                         | 13 [13]   | -3          | 0.011                    |  |  |
| Celery/Cucumber            | 108                     | 26 [28]   | 20                         | 26 [22]  | 0           | 0.43                     | 87                      | 30 [20]   | 24                         | 17 [11]   | -13         | 0.024                    | 195                     | 29 [24]   | 44                         | 23 [20]   | -6          | 0.32                     |  |  |
| Onion                      | 156                     | 13 [15]   | 27                         | 18 [25]  | 5           | 0.56                     | 182                     | 19 [23]   | 13                         | 9 [5]     | -10         | 0.0014                   | 338                     | 17 [18]   | 40                         | 11 [16]   | -6          | 0.072                    |  |  |
| Apple                      | 245                     | 166 [10]  | 84                         | 164 [11] | -2          | 0.0021                   | 205                     | 166 [5]   | 106                        | 164 [21]  | -2          | 0.012                    | 450                     | 166 [5]   | 190                        | 164 [15]  | -2          | 0.0003                   |  |  |
| Orange                     | 97                      | 121 [27]  | 48                         | 75 [56]  | -46         | 0.39                     | 116                     | 121 [27]  | 42                         | 75 [75]   | -46         | 0.66                     | 280                     | 99 [45]   | 90                         | 75 [56]   | -24         | 0.35                     |  |  |
| Banana                     | 158                     | 86 [45]   | 36                         | 98 [0]   | 12          | 0.0001                   | 122                     | 101 [45]  | 33                         | 98 [13]   | -3          | 0.0040                   | 213                     | 121 [27]  | 69                         | 98 [0]    | -23         | 0.0000                   |  |  |
| Seasonal Fruit             |                         |           |                            |          |             |                          |                         |           |                            |           |             |                          |                         |           |                            |           |             |                          |  |  |

**Table S3d: portion size changes (grams) between ANCNPAS 2007 and the NNPAS 2011–12, children 13–16 years old**

|                                     | Females |                 |         |                 |                    |                             |      |                 | Males   |                 |                    |                             |      |                 |         |                 | Persons            |                             |      |                 |         |                 |                    |                             |
|-------------------------------------|---------|-----------------|---------|-----------------|--------------------|-----------------------------|------|-----------------|---------|-----------------|--------------------|-----------------------------|------|-----------------|---------|-----------------|--------------------|-----------------------------|------|-----------------|---------|-----------------|--------------------|-----------------------------|
| Food                                | 2007    |                 | 2011–12 |                 | $\Delta$<br>Median | $p$ -<br>value <sup>a</sup> | 2007 |                 | 2011–12 |                 | $\Delta$<br>Median | $p$ -<br>value <sup>a</sup> | 2007 |                 | 2011–12 |                 | $\Delta$<br>Median | $p$ -<br>value <sup>a</sup> | 2007 |                 | 2011–12 |                 | $\Delta$<br>Median | $p$ -<br>value <sup>a</sup> |
|                                     | $n$     | Median<br>[IQR] | $n$     | Median<br>[IQR] |                    |                             | $n$  | Median<br>[IQR] | $n$     | Median<br>[IQR] |                    |                             | $n$  | Median<br>[IQR] | $n$     | Median<br>[IQR] |                    |                             | $n$  | Median<br>[IQR] | $n$     | Median<br>[IQR] |                    |                             |
| Peach, nectarin,<br>plum or apricot | 24      | 66 [108]        | 26      | 151 [6]         | 85                 | 0.0044                      | 10   | 148 [129]       | 17      | 151 [76]        | 3                  | 0.82                        | 34   | 94 [85]         | 43      | 151 [13]        | 57                 | 0.020                       |      |                 |         |                 |                    |                             |
| Mixed<br>Berries/Grapes             | 69      | 82 [139]        | 36      | 72 [46]         | -10                | 0.63                        | 46   | 60 [100]        | 25      | 100 [134]       | 40                 | 0.033                       | 115  | 76 [139]        | 61      | 75 [72]         | -1                 | 0.27                        |      |                 |         |                 |                    |                             |

<sup>a</sup> $p$ -values without Bonferroni correction

**Table S3e: portion size changes (grams) between ANCNPAS 2007 and the NNPAS 2011–12, children 2–16 years old**

|                    | Females                 |           |                            |           |             |                          |                         |           | Males                      |           |             |                          | Persons                 |           |                            |           |             |                          |  |  |
|--------------------|-------------------------|-----------|----------------------------|-----------|-------------|--------------------------|-------------------------|-----------|----------------------------|-----------|-------------|--------------------------|-------------------------|-----------|----------------------------|-----------|-------------|--------------------------|--|--|
|                    | 2007<br>Median<br>[IQR] |           | 2011–12<br>Median<br>[IQR] |           | Δ<br>Median | p-<br>value <sup>a</sup> | 2007<br>Median<br>[IQR] |           | 2011–12<br>Median<br>[IQR] |           | Δ<br>Median | p-<br>value <sup>a</sup> | 2007<br>Median<br>[IQR] |           | 2011–12<br>Median<br>[IQR] |           | Δ<br>Median | p-<br>value <sup>a</sup> |  |  |
| Food               | n                       |           | n                          |           |             |                          | n                       |           | n                          |           |             |                          | n                       |           | n                          |           |             |                          |  |  |
| Drinks             |                         |           |                            |           |             |                          |                         |           |                            |           |             |                          |                         |           |                            |           |             |                          |  |  |
| Diet soft drink    | 137                     | 250 [205] | 49                         | 350 [175] | 100         | 0.17                     | 155                     | 320 [175] | 62                         | 368 [125] | 48          | 0.35                     | 292                     | 291 [175] | 111                        | 360 [125] | 69          | 0.11                     |  |  |
| Soft Drink         | 701                     | 261 [196] | 321                        | 302 [182] | 41          | 0.76                     | 832                     | 313 [161] | 363                        | 364 [134] | 51          | 0.47                     | 1533                    | 304 [183] | 684                        | 348 [182] | 44          | 0.82                     |  |  |
| Water              | 5626                    | 250 [275] | 1771                       | 350 [550] | 100         | 0.0000                   | 5553                    | 250 [275] | 1815                       | 350 [800] | 100         | 0.0000                   | 11179                   | 250 [270] | 3586                       | 350 [800] | 100         | 0.0000                   |  |  |
| Fruit Juice        | 1521                    | 210 [131] | 605                        | 210 [117] | 0           | 0.0000                   | 1532                    | 241 [131] | 632                        | 260 [147] | 19          | 0.0000                   | 3053                    | 210 [131] | 1237                       | 260 [146] | 50          | 0.0000                   |  |  |
| Tea or coffee      | 307                     | 240 [74]  | 148                        | 200 [50]  | -40         | 0.088                    | 260                     | 240 [65]  | 99                         | 220 [100] | -20         | 0.0012                   | 567                     | 240 [70]  | 247                        | 220 [50]  | -20         | 0.0004                   |  |  |
| Dairy Foods        |                         |           |                            |           |             |                          |                         |           |                            |           |             |                          |                         |           |                            |           |             |                          |  |  |
| Whole Milk         | 2089                    | 194 [129] | 941                        | 206 [160] | 12          | 0.0030                   | 2500                    | 206 [129] | 1070                       | 206 [155] | 0           | 0.0000                   | 4589                    | 206 [129] | 2011                       | 206 [155] | 0           | 0.0000                   |  |  |
| Reduced Fat Milk   | 714                     | 155 [172] | 304                        | 165 [177] | 10          | 0.037                    | 761                     | 206 [129] | 277                        | 208 [156] | 2           | 0.32                     | 1475                    | 194 [145] | 581                        | 208 [161] | 14          | 0.058                    |  |  |
| Flavoured Milk     | 375                     | 258 [106] | 136                        | 340 [229] | 82          | 0.0000                   | 352                     | 258 [163] | 159                        | 283 [192] | 25          | 0.025                    | 727                     | 258 [147] | 295                        | 318 [216] | 60          | 0.0000                   |  |  |
| Ice cream          | 480                     | 62 [75]   | 190                        | 78 [81]   | 16          | 0.025                    | 466                     | 70 [83]   | 208                        | 88 [90]   | 18          | 0.0000                   | 946                     | 68 [78]   | 398                        | 81 [77]   | 13          | 0.0000                   |  |  |
| Yoghurt            | 592                     | 100 [80]  | 277                        | 100 [80]  | 0           | 0.22                     | 592                     | 100 [80]  | 257                        | 100 [75]  | 0           | 0.041                    | 1184                    | 100 [80]  | 534                        | 100 [80]  | 0           | 0.022                    |  |  |
| Cheese             | 1245                    | 21 [19]   | 367                        | 21 [9]    | 0           | 0.12                     | 1243                    | 21 [20]   | 422                        | 25 [9]    | 4           | 0.058                    | 2488                    | 21 [18]   | 789                        | 24 [8]    | 3           | 0.011                    |  |  |
| Breads and Cereals |                         |           |                            |           |             |                          |                         |           |                            |           |             |                          |                         |           |                            |           |             |                          |  |  |
| Hot porridge       | 138                     | 130 [213] | 89                         | 180 [213] | 50          | 0.11                     | 120                     | 211 [177] | 63                         | 202 [208] | -9          | 0.68                     | 258                     | 195 [200] | 152                        | 193 [213] | -2          | 0.20                     |  |  |
| Breakfast Cereal   | 1132                    | 30 [23]   | 522                        | 33 [25]   | 3           | 0.69                     | 1476                    | 38 [30]   | 651                        | 34 [27]   | -4          | 0.30                     | 2608                    | 33 [37]   | 1173                       | 34 [30]   | 1           | 0.25                     |  |  |
| White Bread        | 1761                    | 54 [32]   | 807                        | 60 [31]   | 6           | 0.011                    | 1967                    | 62 [37]   | 936                        | 64 [16]   | 2           | 0.0017                   | 3728                    | 60 [31]   | 1743                       | 64 [32]   | 4           | 0.0000                   |  |  |
| Mixed Grain Bread  | 352                     | 64 [34]   | 140                        | 60 [36]   | -4          | 0.43                     | 332                     | 64 [31]   | 157                        | 70 [36]   | 6           | 0.042                    | 684                     | 64 [32]   | 297                        | 60 [36]   | -4          | 0.035                    |  |  |
| Wholemeal Bread    | 599                     | 52[32]    | 266                        | 62 [31]   | 10          | 0.0097                   | 610                     | 60 [31]   | 252                        | 66 [24]   | 6           | 0.0084                   | 1209                    | 56 [30]   | 518                        | 64 [30]   | 8           | 0.0002                   |  |  |
| Rice               | 404                     | 143[134]  | 256                        | 127 [139] | -16         | 0.023                    | 384                     | 175 [190] | 259                        | 134 [125] | -41         | 0.0002                   | 788                     | 144 [123] | 515                        | 134 [134] | -10         | 0.0000                   |  |  |
| Pasta              | 594                     | 150 [150] | 283                        | 208 [223] | 58          | 0.0000                   | 643                     | 150 [169] | 265                        | 310 [247] | 160         | 0.0000                   | 1237                    | 150 [142] | 548                        | 220 [251] | 70          | 0.0000                   |  |  |



**Table S3e: portion size changes (grams) between ANCNPAS 2007 and the NNPAS 2011–12, children 2–16 years old**

|                          | Females                 |           |                            |           |             |                          |                         |           | Males                      |           |             |                          | Persons                 |           |                            |           |             |                          |  |  |
|--------------------------|-------------------------|-----------|----------------------------|-----------|-------------|--------------------------|-------------------------|-----------|----------------------------|-----------|-------------|--------------------------|-------------------------|-----------|----------------------------|-----------|-------------|--------------------------|--|--|
|                          | 2007<br>Median<br>[IQR] |           | 2011–12<br>Median<br>[IQR] |           | Δ<br>Median | p-<br>value <sup>a</sup> | 2007<br>Median<br>[IQR] |           | 2011–12<br>Median<br>[IQR] |           | Δ<br>Median | p-<br>value <sup>a</sup> | 2007<br>Median<br>[IQR] |           | 2011–12<br>Median<br>[IQR] |           | Δ<br>Median | p-<br>value <sup>a</sup> |  |  |
| Food                     | n                       |           | n                          |           |             |                          | n                       |           | n                          |           |             |                          | n                       |           | n                          |           |             |                          |  |  |
| Sweets and Snacks        |                         |           |                            |           |             |                          |                         |           |                            |           |             |                          |                         |           |                            |           |             |                          |  |  |
| Cakes                    | 749                     | 55 [63]   | 331                        | 75 [92]   | 20          | 0.0002                   | 696                     | 56 [60]   | 303                        | 85 [109]  | 29          | 0.0000                   | 1445                    | 55 [61]   | 634                        | 77 [95]   | 22          | 0.0001                   |  |  |
| Sweet pie/pastry         | 162                     | 61 [50]   | 76                         | 67 [36]   | 6           | 0.046                    | 167                     | 71 [53]   | 105                        | 67 [29]   | -4          | 0.65                     | 329                     | 67 [53]   | 181                        | 67 [34]   | 0           | 0.31                     |  |  |
| Other desserts           | 205                     | 119 [60]  | 86                         | 100 [88]  | -19         | 0.049                    | 200                     | 140 [50]  | 70                         | 100 [83]  | -40         | 0.0049                   | 405                     | 140 [59]  | 156                        | 100 [85]  | -40         | 0.0007                   |  |  |
| Plain sweet biscuits     | 481                     | 18 [15]   | 304                        | 20 [18]   | 2           | 0.0004                   | 471                     | 22 [20]   | 291                        | 22 [18]   | 0           | 0.011                    | 952                     | 20 [18]   | 595                        | 20 [17]   | 0           | 0.0000                   |  |  |
| Cream/chocolate biscuits | 322                     | 21 [16]   | 140                        | 21 [18]   | 0           | 0.23                     | 391                     | 23 [17]   | 149                        | 25 [19]   | 2           | 0.53                     | 713                     | 22 [17]   | 289                        | 22 [18]   | 0           | 0.68                     |  |  |
| Savoury biscuits         | 836                     | 17 [15]   | 393                        | 17 [18]   | 0           | 0.37                     | 760                     | 18 [13]   | 361                        | 18 [22]   | 0           | 0.29                     | 1596                    | 18 [14]   | 754                        | 17 [18]   | -1          | 0.16                     |  |  |
| Savoury combi snacks     | 74                      | 25 [0]    | 35                         | 24 [42]   | -1          | 0.72                     | 76                      | 25 [0]    | 40                         | 24 [1]    | -1          | 0.0001                   | 150                     | 25 [0]    | 75                         | 24 [26]   | -1          | 0.0081                   |  |  |
| Snack noodles            | 153                     | 136 [111] | 63                         | 145 [288] | 9           | 0.0087                   | 144                     | 136 [176] | 68                         | 164 [203] | 28          | 0.0029                   | 297                     | 136 [160] | 131                        | 145 [235] | 9           | 0.0001                   |  |  |
| Muesli bars              | 299                     | 31 [11]   | 180                        | 31 [1]    | 0           | 0.15                     | 323                     | 31 [11]   | 215                        | 31 [3]    | 0           | 0.16                     | 622                     | 31 [11]   | 395                        | 31 [1]    | 0           | 0.041                    |  |  |
| Main Meals               |                         |           |                            |           |             |                          |                         |           |                            |           |             |                          |                         |           |                            |           |             |                          |  |  |
| Mince Dish               | 375                     | 85 [97]   | 157                        | 192 [270] | 107         | 0.0000                   | 432                     | 107 [127] | 161                        | 187 [298] | 80          | 0.0000                   | 807                     | 93 [114]  | 318                        | 192 [291] | 99          | 0.0000                   |  |  |
| Mixed meat dish          | 56                      | 171 [171] | 62                         | 165 [148] | -6          | 0.77                     | 54                      | 167 [200] | 79                         | 215 [193] | 48          | 0.19                     | 110                     | 167 [153] | 141                        | 204 [220] | 37          | 0.16                     |  |  |
| Plain Meat               | 420                     | 68 [68]   | 142                        | 106 [85]  | 38          | 0.0000                   | 460                     | 72 [78]   | 143                        | 146 [124] | 74          | 0.0000                   | 880                     | 71 [71]   | 285                        | 120 [94]  | 49          | 0.0000                   |  |  |
| Mixed chicken dish       | 119                     | 94 [80]   | 62                         | 173 [209] | 79          | 0.010                    | 123                     | 127 [190] | 77                         | 215 [220] | 88          | 0.0008                   | 242                     | 101 [137] | 139                        | 198 [228] | 97          | 0.0000                   |  |  |
| Crumbed Chicken          | 254                     | 72 [59]   | 149                        | 88 [81]   | 16          | 0.10                     | 226                     | 93 [90]   | 136                        | 114 [100] | 21          | 0.13                     | 480                     | 81 [75]   | 285                        | 95 [82]   | 14          | 0.021                    |  |  |
| Plain Chicken            | 436                     | 71 [79]   | 167                        | 100 [75]  | 29          | 0.0019                   | 479                     | 86 [87]   | 132                        | 105 [106] | 19          | 0.079                    | 915                     | 75 [87]   | 299                        | 100 [92]  | 25          | 0.0015                   |  |  |
| Fish                     | 166                     | 77 [85]   | 81                         | 73 [59]   | -4          | 0.32                     | 150                     | 92 [74]   | 82                         | 109 [191] | 17          | 0.79                     | 316                     | 92 [74]   | 163                        | 87 [73]   | -5          | 0.60                     |  |  |
| Soup                     | 205                     | 260 [238] | 95                         | 253 [356] | -7          | 0.55                     | 179                     | 260 [262] | 69                         | 318 [182] | 58          | 0.057                    | 384                     | 260 [260] | 164                        | 303 [291] | 43          | 0.44                     |  |  |
| Sausages                 | 288                     | 57 [34]   | 120                        | 89 [46]   | 32          | 0.0000                   | 357                     | 58 [45]   | 138                        | 89 [102]  | 31          | 0.0000                   | 645                     | 57 [41]   | 258                        | 89 [98]   | 32          | 0.0000                   |  |  |
| Hamburger                | 91                      | 137 [95]  | 87                         | 184 [115] | 47          | 0.044                    | 108                     | 186 [121] | 105                        | 185 [136] | -1          | 0.045                    | 199                     | 167 [110] | 192                        | 185 [115] | 18          | 0.0047                   |  |  |

**Table S3e: portion size changes (grams) between ANCNPAS 2007 and the NNPAS 2011–12, children 2–16 years old**

|                         | Females                 |           |                            |           |             |                          | Males                   |           |                            |           |             |                          | Persons                 |           |                            |           |             |                          |
|-------------------------|-------------------------|-----------|----------------------------|-----------|-------------|--------------------------|-------------------------|-----------|----------------------------|-----------|-------------|--------------------------|-------------------------|-----------|----------------------------|-----------|-------------|--------------------------|
|                         | 2007<br>Median<br>[IQR] |           | 2011–12<br>Median<br>[IQR] |           | Δ<br>Median | p-<br>value <sup>a</sup> | 2007<br>Median<br>[IQR] |           | 2011–12<br>Median<br>[IQR] |           | Δ<br>Median | p-<br>value <sup>a</sup> | 2007<br>Median<br>[IQR] |           | 2011–12<br>Median<br>[IQR] |           | Δ<br>Median | p-<br>value <sup>a</sup> |
| Food                    | n                       |           | n                          |           |             |                          | n                       |           | n                          |           |             |                          | n                       |           | n                          |           |             |                          |
| Pizza                   | 170                     | 116 [101] | 90                         | 163 [128] | 47          | 0.0002                   | 190                     | 153 [189] | 110                        | 186 [188] | 33          | 0.33                     | 360                     | 139 [156] | 200                        | 185 [176] | 46          | 0.0013                   |
| Pie                     | 217                     | 130 [79]  | 86                         | 130 [99]  | 0           | 0.38                     | 272                     | 161 [59]  | 124                        | 130 [94]  | -31         | 0.48                     | 489                     | 135 [64]  | 210                        | 130 [95]  | -5          | 0.78                     |
| Other Foods             |                         |           |                            |           |             |                          |                         |           |                            |           |             |                          |                         |           |                            |           |             |                          |
| Chips (not potato)      | 260                     | 21 [26]   | 158                        | 22 [17]   | 1           | 0.041                    | 264                     | 20 [35]   | 159                        | 22 [26]   | 2           | 0.91                     | 524                     | 21 [29]   | 317                        | 22 [25]   | 1           | 0.16                     |
| Potato crisps           | 425                     | 21 [7]    | 193                        | 21 [22]   | 0           | 0.69                     | 443                     | 21 [29]   | 213                        | 21 [23]   | 0           | 0.0014                   | 868                     | 21 [20]   | 406                        | 21 [23]   | 0           | 0.010                    |
| Ice block - cream       | 111                     | 65 [26]   | 66                         | 80 [6]    | 15          | 0.0000                   | 111                     | 68 [15]   | 70                         | 80 [9]    | 12          | 0.0000                   | 222                     | 68 [19]   | 136                        | 80 [9]    | 12          | 0.0000                   |
| Ice block - water       | 137                     | 76 [6]    | 113                        | 75 [0]    | -1          | 0.78                     | 134                     | 76 [8]    | 94                         | 75 [0]    | -1          | 0.94                     | 271                     | 76 [9]    | 207                        | 75 [0]    | -1          | 0.84                     |
| Chocolate               | 737                     | 19 [25]   | 290                        | 20 [28]   | 1           | 0.50                     | 683                     | 20 [27]   | 249                        | 20 [31]   | 0           | 0.31                     | 1420                    | 20 [27]   | 539                        | 20 [28]   | 0           | 0.23                     |
| Lollies                 | 581                     | 14 [17]   | 226                        | 15 [17]   | 1           | 0.86                     | 529                     | 16 [21]   | 210                        | 15 [18]   | -1          | 0.040                    | 1110                    | 16 [22]   | 436                        | 15 [17]   | -1          | 0.12                     |
| Salad dressing full fat | 175                     | 9 [14]    | 78                         | 20 [7]    | 11          | 0.0000                   | 178                     | 10 [14]   | 108                        | 14 [7]    | 4           | 0.0000                   | 353                     | 9 [14]    | 186                        | 14 [7]    | 5           | 0.0000                   |
| Nuts                    | 120                     | 18 [29]   | 45                         | 27 [26]   | 9           | 0.20                     | 95                      | 14 [29]   | 50                         | 24 [27]   | 10          | 0.21                     | 215                     | 16 [29]   | 95                         | 27 [26]   | 11          | 0.078                    |
| Jam/Honey               | 690                     | 10 [8]    | 241                        | 8 [7]     | -2          | 0.17                     | 601                     | 11 [13]   | 265                        | 10 [16]   | -1          | 0.018                    | 1191                    | 10 [8]    | 506                        | 10 [14]   | 0           | 0.0074                   |
| Peanut butter           | 360                     | 10 [12]   | 150                        | 9 [4]     | -1          | 0.017                    | 424                     | 12 [13]   | 188                        | 10 [9]    | -2          | 0.63                     | 784                     | 12 [13]   | 338                        | 10 [6]    | -2          | 0.059                    |
| Vegemite                | 729                     | 5 [3]     | 266                        | 6 [4]     | 1           | 0.024                    | 676                     | 5 [4]     | 305                        | 6 [4]     | 1           | 0.39                     | 1405                    | 5 [3]     | 571                        | 6 [4]     | 1           | 0.40                     |
| Tomato Sauce            | 646                     | 11 [17]   | 187                        | 14 [11]   | 3           | 0.0000                   | 750                     | 13 [17]   | 254                        | 14 [14]   | 1           | 0.0007                   | 1396                    | 11 [17]   | 441                        | 14 [11]   | 3           | 0.0000                   |
| Devon, salami           | 177                     | 28 [31]   | 43                         | 28 [24]   | 0           | 0.80                     | 203                     | 28 [36]   | 56                         | 28 [23]   | 0           | 0.49                     | 380                     | 28 [32]   | 99                         | 28 [22]   | 0           | 0.71                     |
| Bacon/Ham               | 519                     | 27 [22]   | 251                        | 17 [15]   | -10         | 0.0000                   | 563                     | 30 [30]   | 257                        | 17 [17]   | -13         | 0.0000                   | 1082                    | 27 [26]   | 508                        | 17 [17]   | -10         | 0.0000                   |
| Eggs                    | 340                     | 43 [37]   | 178                        | 51 [37]   | 8           | 0.0003                   | 340                     | 43 [49]   | 146                        | 50 [37]   | 7           | 0.0004                   | 680                     | 43 [47]   | 324                        | 51 [37]   | 8           | 0.0000                   |
| Fruit and Vegetables    |                         |           |                            |           |             |                          |                         |           |                            |           |             |                          |                         |           |                            |           |             |                          |
| Hot Chips               | 527                     | 90 [72]   | 242                        | 57 [72]   | -33         | 0.0000                   | 488                     | 100 [75]  | 216                        | 66 [87]   | -34         | 0.0000                   | 1015                    | 100 [78]  | 458                        | 57 [76]   | -43         | 0.0000                   |
| Potato                  | 594                     | 83 [69]   | 215                        | 83 [97]   | 0           | 0.38                     | 599                     | 98 [98]   | 197                        | 96 [107]  | -2          | 0.56                     | 1193                    | 92 [82]   | 412                        | 91 [124]  | -1          | 0.32                     |
| Peas                    | 324                     | 20 [30]   | 71                         | 30 [28]   | 10          | 0.25                     | 337                     | 23 [30]   | 66                         | 26 [40]   | 3           | 0.28                     | 661                     | 23 [30]   | 137                        | 26 [38]   | 3           | 0.14                     |

**Table S3e: portion size changes (grams) between ANCNPAS 2007 and the NNPAS 2011–12, children 2–16 years old**

|                                     | Females                 |           |                            |          |             |                          |                         |           |                            |           |             |                          |                         |           | Males                      |          |             |                          |  |  |  |  |  |  |  |  |  |  | Persons |  |  |  |  |  |  |  |  |  |  |  |  |  |
|-------------------------------------|-------------------------|-----------|----------------------------|----------|-------------|--------------------------|-------------------------|-----------|----------------------------|-----------|-------------|--------------------------|-------------------------|-----------|----------------------------|----------|-------------|--------------------------|--|--|--|--|--|--|--|--|--|--|---------|--|--|--|--|--|--|--|--|--|--|--|--|--|
|                                     | 2007<br>Median<br>[IQR] |           | 2011–12<br>Median<br>[IQR] |          | Δ<br>Median | p-<br>value <sup>a</sup> | 2007<br>Median<br>[IQR] |           | 2011–12<br>Median<br>[IQR] |           | Δ<br>Median | p-<br>value <sup>a</sup> | 2007<br>Median<br>[IQR] |           | 2011–12<br>Median<br>[IQR] |          | Δ<br>Median | p-<br>value <sup>a</sup> |  |  |  |  |  |  |  |  |  |  |         |  |  |  |  |  |  |  |  |  |  |  |  |  |
| Food                                | n                       |           | n                          |          |             |                          | n                       |           | n                          |           |             |                          | n                       |           | n                          |          |             |                          |  |  |  |  |  |  |  |  |  |  |         |  |  |  |  |  |  |  |  |  |  |  |  |  |
| Broccoli                            | 340                     | 30 [21]   | 62                         | 46 [58]  | 16          | 0.0006                   | 314                     | 30 [30]   | 77                         | 23 [28]   | -7          | 0.86                     | 654                     | 30 [24]   | 139                        | 35 [38]  | 5           | 0.041                    |  |  |  |  |  |  |  |  |  |  |         |  |  |  |  |  |  |  |  |  |  |  |  |  |
| Carrots                             | 834                     | 27 [28]   | 201                        | 37 [58]  | 10          | 0.0000                   | 803                     | 29 [29]   | 198                        | 37 [63]   | 8           | 0.0000                   | 1637                    | 28 [29]   | 399                        | 37 [63]  | 9           | 0.0000                   |  |  |  |  |  |  |  |  |  |  |         |  |  |  |  |  |  |  |  |  |  |  |  |  |
| Corn                                | 276                     | 35 [49]   | 64                         | 70 [112] | 35          | 0.0001                   | 274                     | 39 [46]   | 77                         | 65 [118]  | 26          | 0.0011                   | 550                     | 39 [49]   | 141                        | 70 [112] | 31          | 0.0000                   |  |  |  |  |  |  |  |  |  |  |         |  |  |  |  |  |  |  |  |  |  |  |  |  |
| Tomato                              | 488                     | 51 [45]   | 157                        | 29 [24]  | -22         | 0.0000                   | 464                     | 56 [49]   | 122                        | 30 [29]   | -26         | 0.0000                   | 952                     | 51 [48]   | 279                        | 29 [31]  | -22         | 0.0000                   |  |  |  |  |  |  |  |  |  |  |         |  |  |  |  |  |  |  |  |  |  |  |  |  |
| Lettuce                             | 352                     | 15 [21]   | 91                         | 12 [13]  | -3          | 0.26                     | 341                     | 15 [21]   | 117                        | 13 [13]   | -2          | 0.44                     | 693                     | 15 [21]   | 208                        | 13 [13]  | -2          | 0.86                     |  |  |  |  |  |  |  |  |  |  |         |  |  |  |  |  |  |  |  |  |  |  |  |  |
| Celery/Cucumber                     | 347                     | 25 [25]   | 96                         | 26 [46]  | 1           | 0.093                    | 298                     | 24 [25]   | 80                         | 26 [62]   | 2           | 0.028                    | 645                     | 25 [25]   | 176                        | 26 [56]  | 1           | 0.0062                   |  |  |  |  |  |  |  |  |  |  |         |  |  |  |  |  |  |  |  |  |  |  |  |  |
| Onion                               | 413                     | 11 [14]   | 54                         | 14 [17]  | 3           | 0.56                     | 461                     | 14 [17]   | 43                         | 9 [13]    | -5          | 0.037                    | 874                     | 12 [15]   | 97                         | 11 [13]  | -1          | 0.33                     |  |  |  |  |  |  |  |  |  |  |         |  |  |  |  |  |  |  |  |  |  |  |  |  |
| Dried fruit                         | 228                     | 25 [12]   | 67                         | 21 [29]  | -4          | 0.70                     | 255                     | 20 [30]   | 76                         | 20 [27]   | 0           | 0.39                     | 483                     | 21 [28]   | 143                        | 20 [28]  | -1          | 0.72                     |  |  |  |  |  |  |  |  |  |  |         |  |  |  |  |  |  |  |  |  |  |  |  |  |
| Apple                               | 1180                    | 146 [83]  | 524                        | 153 [49] | 7           | 0.19                     | 1116                    | 146 [83]  | 590                        | 164 [25]  | 18          | 0.0004                   | 2296                    | 146 [83]  | 1114                       | 164 [28] | 18          | 0.0004                   |  |  |  |  |  |  |  |  |  |  |         |  |  |  |  |  |  |  |  |  |  |  |  |  |
| Orange                              | 564                     | 86 [39]   | 248                        | 75 [56]  | -11         | 0.068                    | 505                     | 86 [57]   | 194                        | 75 [56]   | -11         | 0.037                    | 1069                    | 86 [53]   | 442                        | 75 [56]  | -11         | 0.0070                   |  |  |  |  |  |  |  |  |  |  |         |  |  |  |  |  |  |  |  |  |  |  |  |  |
| Banana                              | 646                     | 121 [61]  | 242                        | 98 [24]  | -23         | 0.0010                   | 638                     | 121 [44]  | 268                        | 98 [0]    | -23         | 0.012                    | 1284                    | 121 [59]  | 510                        | 98 [0]   | -23         | 0.0000                   |  |  |  |  |  |  |  |  |  |  |         |  |  |  |  |  |  |  |  |  |  |  |  |  |
| Seasonal Fruit                      |                         |           |                            |          |             |                          |                         |           |                            |           |             |                          |                         |           |                            |          |             |                          |  |  |  |  |  |  |  |  |  |  |         |  |  |  |  |  |  |  |  |  |  |  |  |  |
| Peach, nectarin,<br>plum or apricot | 68                      | 66 [92]   | 89                         | 151 [76] | 85          | 0.0000                   | 47                      | 73 [85]   | 67                         | 145 [79]  | 72          | 0.012                    | 115                     | 72 [94]   | 156                        | 151 [76] | 79          | 0.0000                   |  |  |  |  |  |  |  |  |  |  |         |  |  |  |  |  |  |  |  |  |  |  |  |  |
| Mixed<br>Berries/Grapes             | 387                     | 60 [84]   | 267                        | 54 [60]  | -6          | 0.51                     | 330                     | 60 [71]   | 244                        | 60 [60]   | 0           | 0.67                     | 717                     | 60 [84]   | 511                        | 60 [60]  | 0           | 0.44                     |  |  |  |  |  |  |  |  |  |  |         |  |  |  |  |  |  |  |  |  |  |  |  |  |
| Melon                               | 203                     | 107 [116] | 111                        | 135 [85] | 28          | 0.37                     | 206                     | 130 [164] | 88                         | 150 [132] | 20          | 0.70                     | 409                     | 121 [145] | 199                        | 150 [95] | 29          | 0.79                     |  |  |  |  |  |  |  |  |  |  |         |  |  |  |  |  |  |  |  |  |  |  |  |  |

<sup>a</sup>*p*-values without Bonferroni correction
