# Supplementary material for: Trends in Food and Beverage Portion Sizes in Australian Children; a Time-Series Analysis Comparing 2007 and 2011–2012 National Data
Source: MDPI journal article supplement (doi:10.3390/children4080069), 2017-08-04
Supplement: s1 [file s1]

**Table S4.** Significant changes in the portion size of ACAES items between 2007 and 2011–12, in the whole sample and for several population groups<sup>a</sup>

| Food                       | 2–4 years |       |     | 5–8 years |       |     | 9–12 years |       |     | 13–16 years |       |     | 2–16 years |       |     |
|----------------------------|-----------|-------|-----|-----------|-------|-----|------------|-------|-----|-------------|-------|-----|------------|-------|-----|
|                            | Females   | Males | All | Females   | Males | All | Females    | Males | All | Females     | Males | All | Females    | Males | All |
| Drinks                     |           |       |     |           |       |     |            |       |     |             |       |     |            |       |     |
| Water                      | ↑         | ↑     | ↑   | ↑         | ↑     | ↑   | ↑          | ↑     | ↑   | ↑           | ↑     | ↑   | ↑          | ↑     | ↑   |
| Fruit juice                | ↑         | ↑     | ↑   |           |       |     |            |       | ↑   | ↑           |       | ↑   | 0↑         | ↑     | ↑   |
| Tea or coffee              |           |       |     |           |       |     |            |       |     |             |       | ↓   | ↓          |       | ↓   |
| Dairy Foods                |           |       |     |           |       |     |            |       |     |             |       |     |            |       |     |
| Whole milk                 |           |       |     |           | 0↓    | 0↓  |            | ↓     | ↓   |             |       |     |            | 0↓    | 0↓  |
| Flavoured milk             | ↑         |       |     |           |       |     |            |       | ↑   | ↑           |       |     | ↑          |       | ↑   |
| Ice cream                  |           |       |     |           |       |     |            |       |     |             |       |     |            | ↑     | ↑   |
| Cheese                     |           |       | ↑   |           |       |     |            |       |     |             |       |     |            |       |     |
| Breads and Cereals         |           |       |     |           |       |     |            |       |     |             |       |     |            |       |     |
| White bread                |           | ↑     | ↑   |           |       |     |            |       |     |             |       |     |            |       | ↑   |
| Wholemeal bread            |           |       |     |           |       |     |            |       |     |             |       |     |            |       | ↑   |
| Rice                       |           |       |     |           |       |     |            |       |     |             |       |     |            | ↓     | ↓   |
| Pasta                      |           |       |     |           | ↑     | ↑   |            | ↑     | ↑   | ↑           | ↑     | ↑   | ↑          | ↑     | ↑   |
| Sweets and Snacks          |           |       |     |           |       |     |            |       |     |             |       |     |            |       |     |
| Cakes                      |           |       |     |           |       |     | ↑          |       | ↑   |             | ↑     | ↑   | ↑          | ↑     | ↑   |
| Plain sweet biscuits       |           |       |     |           |       |     |            |       |     |             |       |     | ↑          |       | 0↑  |
| Savoury combination snacks |           |       |     |           |       | ↓   |            |       |     |             |       |     |            | ↓     |     |
| Snack noodles              |           |       |     |           |       |     |            |       | ↑   |             |       |     |            |       | ↑   |
| Main meals                 |           |       |     |           |       |     |            |       |     |             |       |     |            |       |     |
| Mince dish                 |           |       |     |           |       |     |            | ↑     | ↑   | ↑           |       | ↑   | ↑          | ↑     | ↑   |
| Plain meat                 | ↑         | ↑     | ↑   |           | ↑     | ↑   |            |       | ↑   | ↑           | ↑     | ↑   | ↑          | ↑     | ↑   |
| Mixed chicken dish         |           |       |     |           |       |     |            |       |     |             |       |     |            |       | ↑   |
| Sausages                   | ↑         | ↑     | ↑   | ↑         | ↑     | ↑   | ↑          | ↑     | ↑   |             | ↑     | ↑   | ↑          | ↑     | ↑   |
| Pizza                      |           |       |     |           |       |     |            |       | ↑   |             |       |     | ↑          |       |     |
| Other Foods                |           |       |     |           |       |     |            |       |     |             |       |     |            |       |     |

|                                    |   |   |   |   |   |   |   |   |   |   |   |   |   |   |   |   |   |   |
|------------------------------------|---|---|---|---|---|---|---|---|---|---|---|---|---|---|---|---|---|---|
| Ice block – cream                  |   |   |   |   |   | ↑ |   | ↑ |   |   |   |   |   | ↑ |   | ↑ |   | ↑ |
| Salad dressing full fat            |   |   |   |   |   |   |   | ↑ |   | ↑ |   |   | ↑ | ↑ |   | ↑ |   | ↑ |
| Tomato sauce                       |   |   |   |   |   | ↑ |   |   |   |   |   |   |   | ↑ |   |   |   | ↑ |
| Bacon, ham                         | ↓ |   |   | ↓ | ↓ | ↓ |   | ↓ |   | ↓ |   | ↓ |   | ↓ |   | ↓ | ↓ | ↓ |
| Eggs                               |   |   |   |   |   |   |   |   |   |   |   |   |   | ↑ |   | ↑ |   | ↑ |
| <b>Fruit and vegetables</b>        |   |   |   |   |   |   |   |   |   |   |   |   |   |   |   |   |   |   |
| Hot chips                          | ↓ | ↓ | ↓ | ↓ | ↓ | ↓ | ↓ | ↓ |   | ↓ | ↓ | ↓ | ↓ | ↓ | ↓ | ↓ | ↓ | ↓ |
| Broccoli                           |   |   |   |   |   |   |   |   |   |   |   |   |   | ↑ |   |   |   |   |
| Carrots                            | ↑ | ↑ | ↑ | ↑ |   | ↑ |   |   |   |   |   |   |   | ↑ |   | ↑ |   | ↑ |
| Corn                               |   |   |   |   |   | ↑ | ↑ |   |   |   |   |   |   | ↑ |   |   |   | ↑ |
| Tomato                             |   |   |   | ↓ |   | ↓ | ↓ |   | ↓ | ↓ | ↓ | ↓ | ↓ | ↓ | ↓ | ↓ | ↓ | ↓ |
| Apple                              | ↑ | ↑ | ↑ |   |   |   |   |   |   |   |   |   | ↓ |   |   | ↑ |   | ↑ |
| Orange                             | ↑ |   | ↑ |   |   |   |   |   |   |   |   |   |   |   |   |   |   |   |
| Banana                             |   |   |   | ↓ |   | ↓ |   |   | ↓ | ↑ |   | ↓ |   |   |   |   |   | ↓ |
| <b>Seasonal fruits</b>             |   |   |   |   |   |   |   |   |   |   |   |   |   |   |   |   |   |   |
| Peach, nectarine,<br>plum, apricot |   |   |   |   |   |   |   |   |   |   |   |   |   | ↑ |   |   |   | ↑ |

<sup>a</sup> Only foods of which the portion size changed significantly ( $p < 0.05$  (Bonferroni corrected)) in the whole sample or in at least one of the population subgroups are presented.

↑ indicates an increase in portion size in 2011–12, when compared to 2007

↓ indicated a decrease in portion size in 2011–12, when compared to 2007

- indicates that the change in portion size was either not significant ( $p > 0.05$ ) or the food was eaten by <5% of the 2011–12 population

0<sup>†</sup> Change in median portion size was 0, however the Mann Whitney U test found a significant increase in portion size distributions in 2011–12, when compared to 2007

0<sup>‡</sup> Change in median portion size was 0, however the Mann Whitney U test found a significant decrease in portion size distributions in 2011–12, when compared to 2007
