# Supplementary material for: Trends in Food and Beverage Portion Sizes in Australian Children; a Time-Series Analysis Comparing 2007 and 2011–2012 National Data
Source: MDPI journal article supplement (doi:10.3390/children4080069), 2017-08-04
Supplement: s1 [file s1]

**Table S1: Categorization of NNS 1995, ANCNPAS 2007 and NNPAS 2011-12 foods**

| Question | FFQ Item                                                                                                   | NNS (1995) Foods                                  | ANCNPAS (2007) Foods                                                                                                                            | NNPAS (2011-12) Foods                                                                                                                                                        |
|----------|------------------------------------------------------------------------------------------------------------|---------------------------------------------------|-------------------------------------------------------------------------------------------------------------------------------------------------|------------------------------------------------------------------------------------------------------------------------------------------------------------------------------|
| D1       | <u>DIET</u> soft drink eg. Diet coke                                                                       | Soft drinks, artificially sweetened               | Soft drink, intense sweetened                                                                                                                   | Soft drink, intense sweetened or diet<br>Soft drink, energy drink, intense sweetened                                                                                         |
| D2       | Soft drink (NOT DIET) including flavoured mineral water eg. lemonade, coke, fanta, flavoured mineral water | Total non-diet soft drink/flavoured mineral water | Water, mineral, with 5%.<br>Water, mineral, fruit flavours<br>Soft drink                                                                        | Soft drink, regular<br>Soft drink, energy drink<br>Mineral water, (non-)citrus flavoured, regular                                                                            |
| D3       | Water - including bottled water. unflavoured mineral water, tap water                                      | Water, ...                                        | Water, tap<br>Water, sports type<br>Water, rainwater<br>Water, mineral, natural<br>Water, carbonated or soda<br>Water, bottled..<br>Water, bore | Mineral water, natural, unflavoured<br>Water, bore<br>Water, bottled, carbonated<br>Water, bottled, still<br>Water, filtered<br>Water, rainwater or tank water<br>Water, tap |
| D4       | Fruit juice-based drinks, eg. orange juice or Popper                                                       | Single fruit juices                               | Juice concentrate,<br>Juice,<br>Vegetable blend –Juice Plus                                                                                     | Fruit drink, commercial<br>Juice, commercial<br>Juice, fruit blend<br>Juice, fruit & vegetable blend                                                                         |
| D5       | Cordial or 'make up' eg. Cottee's crush, raspberry                                                         | Fruit-based or flavoured cordials and drinks      | Cordial,<br>Drink, fruit flavoured,<br>Fruit drink<br>Fruit puree drink,                                                                        | Cordial base, regular<br>Cordial base, intense sweetened or diet<br>Cordial, recommended dilution                                                                            |
| D6       | Tea or Coffee                                                                                              | Tea, coffee or coffee substitutes                 | Coffee mix,<br>Coffee,<br>Tea,                                                                                                                  | Tea, without milk<br>Coffee,<br>Coffee mix                                                                                                                                   |
| D7       | Beer                                                                                                       | Beers                                             | Beer, lager<br>Beer, reduced alcohol or light style                                                                                             | Beer, lager or ale style,<br>Beer, flavoured,                                                                                                                                |

| Question  | FFQ Item                                                                                  | NNS (1995) Foods                                                                                                    | ANCNPAS (2007) Foods                                                                                                                                        | NNPAS (2011-12) Foods                                                                                                                                     |
|-----------|-------------------------------------------------------------------------------------------|---------------------------------------------------------------------------------------------------------------------|-------------------------------------------------------------------------------------------------------------------------------------------------------------|-----------------------------------------------------------------------------------------------------------------------------------------------------------|
|           |                                                                                           |                                                                                                                     |                                                                                                                                                             | Beer, home-brewed,<br>Beer, stout                                                                                                                         |
| D8        | Wine or wine coolers<br>eg. West Coast cooler                                             | Wine, ....                                                                                                          | Wine                                                                                                                                                        | Wine cooler,<br>Wine,<br>Port<br>Sherry,<br>Mirin                                                                                                         |
| D9        | Spirits eg. vodka,<br>bourbon                                                             | Brandy, ...<br>Whiskey, ...<br>Gin, ...<br>Rum, ...<br>Vodka, ...<br>Spirit, ...<br>Liqueur, ...<br>Mixed Drink, .. | Alcoholic Soda<br>Liqueur<br>Rum, dark & light coloured<br>Whisky<br>Vodka                                                                                  | Ouzo<br>Tequila<br>Vodka<br>Whisky or scorch<br>Spirit,<br>Liqueur,<br>Cointreau<br>Mixed drink<br>Gin<br>Brandy<br>Bitters<br>Rum, dark & light coloured |
| DF1 + DF3 | Soy Milk                                                                                  | Milk - soy (unflavoured)                                                                                            | Soy beverage, unflavoured                                                                                                                                   | Soy beverage                                                                                                                                              |
| DF1 + DF3 | Whole Milk                                                                                | Milk - fat increased/whole milk                                                                                     | Milk, cow, fluid, extra creamy<br>Milk, cow, fluid, regular fat                                                                                             | Milk, cow, fluid, regular fat<br>Milk, cow, fluid, lactose free<br>Toddler milk, regular<br>Milk, cow, fluid, unflavoured                                 |
| DF1 + DF3 | Reduced Fat Milk                                                                          | Milk - fat reduced                                                                                                  | Milk, cow, fluid reduced fat -1-2%-<br>Milk, cow, fluid, reduced fat                                                                                        | Milk, cow, fluid, reduced fat<br>Milk, cow, fluid, lactose free                                                                                           |
| DF1 + DF3 | Skim Milk                                                                                 | Milk, fluid, skim, non-fat                                                                                          | Milk, cow, fluid, skim                                                                                                                                      | Milk, cow, fluid, skim                                                                                                                                    |
| DF2       | Flavoured milk eg.<br>Moove, Oak, hot<br>chocolate,<br>milkshake,<br>thickshake, smoothie | Flavoured milks                                                                                                     | Beverage, banana or similar flavour<br>Beverage, caramel, honeycomb or<br>strawberry flavour<br>Beverage, chocolate flavour<br>Beverage, drinking chocolate | Milk, cow, fluid, flavoured<br>Milkshake<br>Smoothie, cow's milk, all flavours<br>Thickshake                                                              |

| Question | FFQ Item                                                         | NNS (1995) Foods                                                                                                               | ANCNPAS (2007) Foods                                                                                  | NNPAS (2011-12) Foods                                                                                                                 |
|----------|------------------------------------------------------------------|--------------------------------------------------------------------------------------------------------------------------------|-------------------------------------------------------------------------------------------------------|---------------------------------------------------------------------------------------------------------------------------------------|
|          |                                                                  |                                                                                                                                | Beverage, from unfortified base<br>Beverage, malt flavour<br>Milk, cow, fluid, flavoured<br>Milkshake | Beverage                                                                                                                              |
| DF4      | Cream or sour cream                                              | Total cream                                                                                                                    | Cream, sour<br>Cream, whipped                                                                         | Cream<br>Cream, dairy<br>Cream, whipped<br>Cream, sour                                                                                |
| DF5      | Ice cream - vanilla, chocolate, strawberry, sundaes, cones       | ice cream -vanilla rich/regular fat<br>ice cream -other flavour regular fat/rich<br>ice cream -reduced fat<br>ice cream –other | Ice cream sundae<br>Ice cream, reduced fat<br>Ice cream, regular fat<br>Ice cream, soft serve         | Ice cream, premium or rich<br>Ice cream, regular fat<br>Ice cream, low fat<br>Ice cream, fast food style<br>Sundae, vanilla ice cream |
| DF6      | Frozen yoghurt                                                   | Frozen yoghurts, all types                                                                                                     | Yoghurt, frozen                                                                                       | Yoghurt, frozen, regular fat                                                                                                          |
| DF7      | Yoghurt (not frozen) plain or flavoured eg. Ski, Yoplait, Vaalia | Total yoghurt                                                                                                                  | Yoghurt, (except frozen)                                                                              | Yoghurt, Greek style<br>Yoghurt, natural<br>Yogurt, flavoured                                                                         |
| DF8      | Cottage cheese or ricotta                                        | Total cottage and ricotta cheese                                                                                               | Cheese, cottage<br>Cheese, ricotta..                                                                  | Cheese, cottage<br>Cheese, ricotta                                                                                                    |
| DF9      | Cheese including cheese on sandwiches, biscuits or on toast      | Total other cheese                                                                                                             | Cheese, blended<br>Cheese, cheddar<br>Cheese, Colby<br>Cheese, Feta                                   | Cheese, blended<br>Cheese, cheddar<br>Cheese, Colby style<br>Cheese, feta<br>Cheese, mozzarella                                       |
| DF10     | Cheese spread, cream cheese                                      | Total cream cheese or cheese spread                                                                                            | Cheese spread,<br>Cheese, cream<br>Cheese, spread                                                     | Cheese spread<br>Cheese, cream                                                                                                        |
| B1       | Muesli                                                           | Total muesli                                                                                                                   | Muesli, commercial,<br>Muesli, homemade                                                               | Muesli, commercial<br>Muesli, homemade                                                                                                |
| B2       | Cooked porridge                                                  | Breakfast cereal, hot porridge type                                                                                            | Oats,<br>Porridge,                                                                                    | Oats, rolled<br>Porridge, rolled oats                                                                                                 |

| Question | FFQ Item                                                            | NNS (1995) Foods                                                                                                                                                                                                                                                                                                                                                                                     | ANCNPAS (2007) Foods                                                                                         | NNPAS (2011-12) Foods                                                                                                                                                             |
|----------|---------------------------------------------------------------------|------------------------------------------------------------------------------------------------------------------------------------------------------------------------------------------------------------------------------------------------------------------------------------------------------------------------------------------------------------------------------------------------------|--------------------------------------------------------------------------------------------------------------|-----------------------------------------------------------------------------------------------------------------------------------------------------------------------------------|
|          |                                                                     |                                                                                                                                                                                                                                                                                                                                                                                                      |                                                                                                              | Oat bran                                                                                                                                                                          |
| B3       | Breakfast cereal eg. Weet-bix, Nutri-grain, Cornflakes Sultana Bran | Breakfast cereal, low added sugar, puffed, flakes, extruded etc. single cereal — corn, rice<br>Breakfast cereal, wheat-based biscuits and shredded wheat<br>Breakfast cereal, wheat, low added sugar, puffed, flakes<br>Breakfast cereal, wheat, with added fruit or nuts<br>Breakfast cereal, grain mixtures<br>Breakfast cereal, grain and fruit/nut mixtures<br>Breakfast cereal, other sweetened | Breakfast Cereal,                                                                                            | Breakfast cereal                                                                                                                                                                  |
| B5       | Bread, pita bread, roll or toast all types – White                  | Bread, white<br>Bread roll, white                                                                                                                                                                                                                                                                                                                                                                    | Bread, from white flour<br>Bread roll, from white flour<br>Bread or bread roll, from white flour             | Bread, from white flour<br>Bread roll, from white flour<br>Bread or bread roll, topped<br>Bread, from wheat flour, added dried fruit                                              |
| B5       | Bread, pita bread, roll or toast all types – Mixed Grain            | Bread, mixed grain<br>Bread roll, mixed grain<br>Bread, light rye/black/pumpernickel                                                                                                                                                                                                                                                                                                                 | Bread, mixed grain<br>Bread roll, mixed grain<br>Bread or bread roll, mixed grain                            | Bread, mixed grain<br>Bread roll, mixed grain                                                                                                                                     |
| B5       | Bread, pita bread, roll or toast all types - Wholemeal              | Bread, wholemeal<br>Bread roll, wholemeal                                                                                                                                                                                                                                                                                                                                                            | Bread, from wholemeal flour<br>Bread roll, from wholemeal flour<br>Bread or bread roll, from wholemeal flour | Bread, from rye flour<br>Bread, pumpernickel<br>Bread, from spelt flour<br>Bread, from wholemeal flour<br>Bread roll, from wholemeal flour<br>Bread, from white & wholemeal flour |
| B6       | English muffin, bagel or crumpet                                    | English muffins/crumpets and bagels                                                                                                                                                                                                                                                                                                                                                                  | Bagel<br>Crumpet,<br>Muffin, English-style,<br>Muffin, savoury,                                              | Bagel<br>Crumpet<br>Muffin, English style                                                                                                                                         |
| B7       | Rice                                                                | Rice and rice products                                                                                                                                                                                                                                                                                                                                                                               | Rice, brown<br>Rice, flavoured                                                                               | Rice, white<br>Rice, brown                                                                                                                                                        |

| Question | FFQ Item                                                     | NNS (1995) Foods                               | ANCNPAS (2007) Foods                                                                                                                      | NNPAS (2011-12) Foods                                                                                                                                                                                                                                                                            |
|----------|--------------------------------------------------------------|------------------------------------------------|-------------------------------------------------------------------------------------------------------------------------------------------|--------------------------------------------------------------------------------------------------------------------------------------------------------------------------------------------------------------------------------------------------------------------------------------------------|
|          |                                                              |                                                | Rice, purchased as<br>Rice, white                                                                                                         | Rice, flavoured<br>Rice, purchased as<br>Rice, red<br>Rice, wild<br>Rice, cooked<br>Paella<br>Risotto                                                                                                                                                                                            |
| B8       | Other grains eg.<br>cous cous, burghul                       |                                                | Couscous,<br>Cornmeal –polenta<br>Millet, puffed                                                                                          | Bulgur<br>Cornmeal<br>Couscous<br>Quinoa<br>Semolina                                                                                                                                                                                                                                             |
| B9       | Noodles eg. egg<br>noodles (yellow),<br>rice noodles (white) | Noodles, Asian style                           | Noodle,                                                                                                                                   | Noodle,                                                                                                                                                                                                                                                                                          |
| B10      | Pasta eg. spaghetti,<br>lasagne, pasta bake                  | Pasta and egg noodles/filled pasta,<br>ravioli | Gnocchi, potato, boiled<br>Macaroni cheese,<br>Pasta or noodles, buckwheat flour<br>Pasta, ... filled<br>Pasta, white<br>Pasta, wholemeal | Noodles & pasta<br>Pasta, gluten free<br>Pasta, maize flour<br>Pasta, white wheat flour<br>Pasta, wholemeal wheat flour<br>Pasta, unfilled<br>Pasta, filled<br>Gnocchi<br>Lasagne (not bolognese)<br>Macaroni & cheese<br>Pasta dish (not bolognese)<br>Tuna mornay<br>Spaghetti<br>Salad, pasta |
| S1       | Cakes, sweet<br>muffins, scones,<br>pikelets, pancakes,      | Cake,....<br>Bun,....<br>Muffin,.....          | Brownie, chocolate<br>Cake,<br>Cookies,                                                                                                   | Cake or cupcake<br>Cake,<br>Doughnut                                                                                                                                                                                                                                                             |

| Question | FFQ Item                                                                                            | NNS (1995) Foods                                                                                                                      | ANCNPAS (2007) Foods                                                                                                                                                                                                 | NNPAS (2011-12) Foods                                                                                                                                                                                    |
|----------|-----------------------------------------------------------------------------------------------------|---------------------------------------------------------------------------------------------------------------------------------------|----------------------------------------------------------------------------------------------------------------------------------------------------------------------------------------------------------------------|----------------------------------------------------------------------------------------------------------------------------------------------------------------------------------------------------------|
|          | hot cakes eg. apple<br>muffin, chocolate<br>cake, lamington                                         | Scone,.....<br>Batter-based product,....                                                                                              | Doughnut<br>Hotcake,<br>Muffin, cake or American style<br>Pancake, plain<br>Pikelet or drop scone,<br>Scone,                                                                                                         | Muffin, cake-style<br>Crepe or pancake<br>Pikelet<br>Rock cake<br>Scone<br>Slice, brownie<br>Waffle                                                                                                      |
| S2       | Sweet pies or sweet<br>pastries eg. apple<br>pie, Danish                                            | Sweet pastry, ....<br>Tart, ....<br>Slice, ....                                                                                       | Baklava<br>Bun or scroll,<br>Croissant,<br>Danish style pastry,<br>Dumpling, sweet<br>Éclair, chocolate<br>Pie, apple<br>Pie, apricot<br>Pie, lemon<br>Pie, pumpkin<br>Pie, pecan<br>Pie, fruit -<br>Tart,<br>Slice, | Croissant<br>Danish<br>Éclair or profiterole<br>Baklava<br>Dumpling, sweet<br>Pie, sweet<br>Strudel<br>Tart<br>Turnover, apple<br>Slice (not brownie)<br>Bun, sweet<br>Pastry, shortcrust style          |
| S3       | Other puddings or<br>desserts (not ice<br>cream)<br>eg. chocolate<br>mousse, sticky date<br>pudding | Custards, and sweet sauces, milk-<br>based<br>Dairy desserts, smooth or gelatin-<br>based dairy desserts<br>Sugar-based desserts, ... | Crumble,<br>Custard, dairy,<br>Custard, egg,<br>Dairy or yoghurt dessert,<br>Dessert, Bavarian cream,<br>Fudge,<br>Mousse,<br>Pudding,<br>Rum balls<br>Trifle, homemade<br>Souffle, berry                            | Crumble<br>Custard, dairy<br>Custard, egg<br>Custard or yoghurt dessert<br>Custard pudding<br>Dairy dessert<br>Mousse, chocolate<br>Panna cotta<br>Pudding<br>Tiramisu<br>Meringue<br>Souffle, chocolate |

| Question | FFQ Item                                                                                                                 | NNS (1995) Foods                                                                    | ANCNPAS (2007) Foods                                                                                                                                                                                                                                                                                                                                                                                                                                                         | NNPAS (2011-12) Foods                                                                                                                                                                                                                                                 |
|----------|--------------------------------------------------------------------------------------------------------------------------|-------------------------------------------------------------------------------------|------------------------------------------------------------------------------------------------------------------------------------------------------------------------------------------------------------------------------------------------------------------------------------------------------------------------------------------------------------------------------------------------------------------------------------------------------------------------------|-----------------------------------------------------------------------------------------------------------------------------------------------------------------------------------------------------------------------------------------------------------------------|
|          |                                                                                                                          |                                                                                     |                                                                                                                                                                                                                                                                                                                                                                                                                                                                              | Souffle, fruit<br>Trifle<br>Pavlova, plain                                                                                                                                                                                                                            |
| S4       | Plain sweet biscuits<br>eg. Arrowroot,<br>Morning Coffee, Tiny<br>Teddies                                                | Biscuit, sweet, plain ...<br>Biscuit, sweet, fruit filled ....                      | Biscuits, shortbread style<br>Biscuits, sugar-glazed pastry<br>Biscuits, sweet, Anzac<br>Biscuits, sweet, chocolate chip<br>Biscuits, sweet, dried fruit filling<br>Biscuits sweet, ginger flavoured<br>Biscuits, sweet, iced<br>Biscuits, sweet, jam filled<br>Biscuits, sweet, macaroon<br>Biscuit, sweet, oatmeal<br>Biscuit, sweet, plain<br>Biscuit, sweet, sponge finger<br>Biscuit, sweet, wheatmeal<br>Biscuit, sweet, with dried fruit<br>Biscuit, sweet, with nuts | Biscuit, sweet (not cream or chocolate)                                                                                                                                                                                                                               |
| S5       | Cream or chocolate<br>biscuits<br>eg. Tim Tams,<br>shortbread cream                                                      | Sweet biscuits, cream-filled<br>Sweet biscuits, chocolate-coated,<br>chocolate chip | Biscuits, sweet, chocolate coated<br>Biscuits, sweet, chocolate flavour.<br>Biscuits, sweet, chocolate topped<br>Biscuit, sweet, cream filled                                                                                                                                                                                                                                                                                                                                | Biscuit, sweet, chocolate flavoured<br>Biscuit, sweet, sandwich<br>Biscuit, sweet, wheatmeal, chocolate-<br>coated<br>Biscuit, sweet, chocolate<br>Biscuit, sweet, cream assorted<br>Biscuit, sweet, plain, chocolate-coated                                          |
| S6       | Dry or savoury<br>biscuits, crispbread,<br>crackers eg. Vita<br>Weats, Saos, Jatz,<br>Shapes, rice<br>crackers, Cruskits | Total savoury biscuits                                                              | Biscuit, savoury cake<br>Biscuit, savoury cracker<br>Biscuit, savoury crispbread<br>Biscuit, savoury<br>Biscuit, sweet, vanilla                                                                                                                                                                                                                                                                                                                                              | Biscuit, savoury, corn cake<br>Biscuit, savoury, rice cake<br>Biscuit, savoury, rice cracker<br>Biscuit, savoury, corn, crispbread<br>Biscuit, savoury, from rye flour<br>Biscuit, savoury, from white wheat flour<br>Biscuit, savoury, from wholemeal wheat<br>flour |

| Question | FFQ Item                                                                   | NNS (1995) Foods                                                                                                             | ANCNPAS (2007) Foods                                                                                  | NNPAS (2011-12) Foods                                                                                                                                                           |
|----------|----------------------------------------------------------------------------|------------------------------------------------------------------------------------------------------------------------------|-------------------------------------------------------------------------------------------------------|---------------------------------------------------------------------------------------------------------------------------------------------------------------------------------|
|          |                                                                            |                                                                                                                              |                                                                                                       | Biscuit, savoury, rice flour                                                                                                                                                    |
| S7       | Savoury combination snacks - biscuits and cheese eg. Le Snak, Snack abouts | -                                                                                                                            | Savoury snack, biscuit and cheese, ...                                                                | Cracker, with cheddar cheese<br>Cracker, with cheese<br>Snack pack, savoury                                                                                                     |
| S8       | Sweet combination snacks eg. Dunkaroos                                     | -                                                                                                                            | -                                                                                                     | -                                                                                                                                                                               |
| S9       | Snack noodles eg. 2-minute noodles, Monster noodles                        | Snack, noodle-based                                                                                                          | Noodle, wheat, instant                                                                                | Noodle, wheat, instant, flavoured<br>Noodle, wheat, instant, unflavoured<br>Noodle, wheat, instant, low fat                                                                     |
| S10      | Fruit bars eg. Roll Ups                                                    | Fruit bar and fruit-based confectionery                                                                                      | Fruit leather                                                                                         | Fruit bar                                                                                                                                                                       |
| S11      | Snack bars eg. K-time twist bar                                            | -                                                                                                                            | Bar, fruit filled<br>Bar, snack                                                                       | Bar, snack-style<br>Bar, fruit, nut & seed<br>Muffin bar, fruit flavoured                                                                                                       |
| S12      | Muesli bars eg. Yoghurt Tops                                               | Total muesli bars                                                                                                            | Bar, breakfast and snack style, cereal<br>Bar, muesli                                                 | Bar, muesli or snack                                                                                                                                                            |
| M1       | Mince dish eg. spaghetti bolognese, rissoles, shepherd's pie, lasagne      |                                                                                                                              | Beef, mince<br>Cannelloni,, beef<br>Lamb, mince<br>Lasagne,<br>Pasta bake, beef<br>Pasta Bolognese    | Gnocchi (bolognese)<br>Pasta dish (bolognese)<br>Lasagne, beef<br>Beef, mince<br>Meatball or rissole<br>Sauce, pasta, bolognese<br>Lamb, mince<br>Pork, mince<br>Chicken, mince |
| M2       | Beef or lamb pieces and sauce WITHOUT vegetables eg. beef stroganoff       | Mixed dishes where beef or veal is the major component<br>Mixed dishes where lamb or pork, bacon, ham is the major component | Beef, curry<br>Beef, stir-fry<br>Beef, casserole or stew<br>Lamb, curry<br>Lamb, stewed or casseroled | Curry or casserole<br>Curry,<br>Stir-fry<br>Casserole                                                                                                                           |

| Question | FFQ Item                                                                        | NNS (1995) Foods                                          | ANCNPAS (2007) Foods                                                                | NNPAS (2011-12) Foods                      |
|----------|---------------------------------------------------------------------------------|-----------------------------------------------------------|-------------------------------------------------------------------------------------|--------------------------------------------|
| M3       | Beef or lamb pieces and <i>sauce</i> WITH vegetables eg. stir fry               |                                                           | Pork, stir-fry<br>Pork, sweet and sour                                              |                                            |
| M5       | Plain meat (beef or lamb) (eg. roast, chops, steak) WITH vegetables or salad    |                                                           |                                                                                     |                                            |
| M11      | Pork pieces and <i>sauce</i> WITHOUT vegetables eg. sweet and sour pork         |                                                           |                                                                                     |                                            |
| M12      | Pork pieces and <i>sauce</i> WITH vegetables eg. stir fry                       |                                                           |                                                                                     |                                            |
| M14      | Plain pork (eg. roast or chops) WITH vegetables                                 |                                                           |                                                                                     |                                            |
| M4       | Plain meat (beef or lamb) (eg. roast, chops, steak) WITHOUT vegetables or salad | Beef<br>Lamb<br>Veal                                      | Beef, (except mince)<br>Lamb,<br>Veal,                                              | Beef (no mince)<br>Lamb (no mince)<br>Veal |
| M6       | Chicken pieces and <i>sauce</i> WITHOUT vegetables eg. satay chicken            | Mixed dishes where poultry or game is the major component | Chicken, salad<br>Chicken, stew or casserole<br>Chicken, stir fry<br>Chicken, curry | Stir-fry,<br>Casserole<br>Curry            |

| Question | FFQ Item                                                        | NNS (1995) Foods                           | ANCNPAS (2007) Foods                                                                                                                                                   | NNPAS (2011-12) Foods                                                                                                                                                               |
|----------|-----------------------------------------------------------------|--------------------------------------------|------------------------------------------------------------------------------------------------------------------------------------------------------------------------|-------------------------------------------------------------------------------------------------------------------------------------------------------------------------------------|
| M7       | Chicken pieces and <i>sauce</i> WITH vegetables<br>eg. stir fry |                                            |                                                                                                                                                                        |                                                                                                                                                                                     |
| M10      | Plain chicken (eg. roast or BBQ) WITH vegetables                |                                            |                                                                                                                                                                        |                                                                                                                                                                                     |
| M8       | Chicken crumbed<br>eg. chicken nuggets, KFC pieces, schnitzel   | Chicken, crumbed ....                      | Chicken, nugget<br>Chicken, various pieces<br>Chicken,....., crumbed                                                                                                   | Chicken, nugget<br>Chicken, schnitzel<br>Chicken,...coated<br>Chicken,...breadcrumb coating<br>Chicken, kiev                                                                        |
| M9       | Plain chicken (eg. roast or BBQ) WITHOUT vegetables             | Chicken<br>Other poultry                   | Chicken, breast<br>Chicken, baked<br>Chicken, cooked<br>Chicken, drumstick<br>Chicken, grilled.<br>Chicken, kebab<br>Chicken, thigh<br>Chicken, whole<br>Chicken, wing | Chicken, barbecued<br>Chicken, breast<br>Chicken, drumstick<br>Chicken, fillet or kebab<br>Chicken, Maryland<br>Chicken, thigh<br>Chicken, wing<br>Chicken, whole<br>Chicken, flesh |
| M13      | Plain pork (eg. roast or chops) WITHOUT vegetables              | Pork                                       | Pork                                                                                                                                                                   | Pork,                                                                                                                                                                               |
| M15      | Liver – beef, calf, chicken (including paté)                    | Organ meats and offal, products and dishes | Chicken, liver<br>Pate                                                                                                                                                 | Beef, liver<br>Chicken, liver<br>Veal, liver<br>Pate de foie<br>Pate                                                                                                                |

| Question  | FFQ Item                                                  | NNS (1995) Foods                                                                                                                                                                                                                                                                                                                                             | ANCNPAS (2007) Foods                                                                                                                                                                                                                                                                                                         | NNPAS (2011-12) Foods                                                                                                                                                                                                                                                                                                                                                                            |
|-----------|-----------------------------------------------------------|--------------------------------------------------------------------------------------------------------------------------------------------------------------------------------------------------------------------------------------------------------------------------------------------------------------------------------------------------------------|------------------------------------------------------------------------------------------------------------------------------------------------------------------------------------------------------------------------------------------------------------------------------------------------------------------------------|--------------------------------------------------------------------------------------------------------------------------------------------------------------------------------------------------------------------------------------------------------------------------------------------------------------------------------------------------------------------------------------------------|
| M16 + M17 | Fish crumbed or battered and fish not crumbed or battered | Barramundi, ...<br>Blackfish, ...<br>Blue Grenadier, ...<br>Bream, ...<br>Cod, ...<br>Trout, ...<br>Dory, ...<br>Flathead, ...<br>Flounder, ...<br>Kingfish, ...<br>Leather jacket, ...<br>Mullet, ..<br>Mackerel, ...<br>Perch, ...<br>Salmon, ...<br>Shark, ....<br>Snapper, ...<br>Tailor, ...<br>Trevally, ...<br>Tuna, ...<br>Whiting, ...<br>Fish, ... | Bassa –basa-,<br>Blue grenadier – hoki -,<br>Bream<br>Fish finger, ...<br>Fish,<br>Flathead,<br>Mullet, yelloweye,<br>Whiting,<br>Trout<br>Trevally, dory, ling, cod, flounder or sole<br>Snapper,<br>Shark-flake- skinless fillet,<br>Sliver perch,<br>Barramundi<br>Cod,<br>Mulloway,<br>Salmon,<br>Tuna, yellowfin steaks | Barramundi<br>Bassa<br>Blue grenadier<br>Brean<br>Blue-eye trevalla<br>Cod or hake<br>Flathead<br>Flounder<br>John dory<br>Ling<br>Gemfish<br>Grouper<br>Milkfish<br>Morwong<br>Mullet<br>Mulloway<br>Mackerel<br>Nile perch<br>Orange roughly<br>Salmon<br>Shark<br>Silver perch<br>Snapper<br>Swordfish<br>Tilapia<br>Trevally or kingfish<br>Trout<br>Tuna<br>Whiting<br>Fish,<br>Fish finger |

| Question  | FFQ Item                                        | NNS (1995) Foods                                                                                                                                              | ANCNPAS (2007) Foods                                                                                                                                   | NNPAS (2011-12) Foods                                                                                                  |
|-----------|-------------------------------------------------|---------------------------------------------------------------------------------------------------------------------------------------------------------------|--------------------------------------------------------------------------------------------------------------------------------------------------------|------------------------------------------------------------------------------------------------------------------------|
| M18       | Canned tuna, salmon, sardines including patties | Anchovy, canned .....<br>Herring, canned ....<br>Mackerel, canned ...<br>Salmon, ..., canned ...<br>Sardine, canned ...<br>Tuna, canned .....                 | Anchovy, canned<br>Salmon, canned<br>Tuna, canned,<br>Tuna, flavoured, canned<br>Sardine, canned<br>Fish cake                                          | Fish patty or cake<br>Salmon patty or cake<br>Salmon,...canned<br>Sardine,...canned<br>Tuna, canned<br>Anchovy, canned |
| M19       | Other seafood eg. prawns, lobster               | Crab, ...<br>Lobster, ..<br>Bug, ...<br>Prawn, ...<br>Yabbie, ...<br>Abalone, ...<br>Calamari, ...<br>Clam, ...<br>Mussel, ...<br>Oyster, ...<br>Scallop, ... | Crab, various types,<br>Crabmeat,<br>Lobster,<br>Mussel, green,<br>Oyster, baked or grilled<br>Oyster, raw<br>Prawn,<br>Squid or calamari,<br>Scallop, | Crab<br>Lobster<br>Mussel<br>Octopus<br>Oyster<br>Prawn<br>Scallop<br>Squid or calamari                                |
| M20 + M21 | Creamy and clear soup (with rice or noodles)    | Soup, ...                                                                                                                                                     | Soup, ...                                                                                                                                              | Soup,                                                                                                                  |
| M22       | Tacos, burritos, enchiladas                     | Taco and tortilla-based dishes                                                                                                                                | Burrito,<br>Enchilada,<br>Taco,                                                                                                                        | Taco shell<br>Mexican taco<br>Mexican wrap<br>Bread, tortilla<br>Chicken wrap<br>Wrap,                                 |
| M23       | Sausages, frankfurts, Pluto Pup                 | Sausage<br>Frankfurts, and saveloys                                                                                                                           | Frankfurt or cheerios,<br>Sausage,                                                                                                                     | Sausage,<br>Frankfurt<br>Saveloy                                                                                       |
| M24       | Hamburger - all types                           | Chickenburger<br>Fishburger<br>Hamburger                                                                                                                      | Chickenburger<br>Fishburger,<br>Hamburger,                                                                                                             | Chicken burger<br>Chicken roll<br>Hamburger                                                                            |

| Question | FFQ Item                                                  | NNS (1995) Foods                                | ANCNPAS (2007) Foods                                                                                                                                                                                                                                                                       | NNPAS (2011-12) Foods                                                                                                                                                                                                                                                                                                                       |
|----------|-----------------------------------------------------------|-------------------------------------------------|--------------------------------------------------------------------------------------------------------------------------------------------------------------------------------------------------------------------------------------------------------------------------------------------|---------------------------------------------------------------------------------------------------------------------------------------------------------------------------------------------------------------------------------------------------------------------------------------------------------------------------------------------|
|          |                                                           |                                                 |                                                                                                                                                                                                                                                                                            | Fish burger                                                                                                                                                                                                                                                                                                                                 |
| M25      | Pizza                                                     | Pizza                                           | Pizza,                                                                                                                                                                                                                                                                                     | Pizza,                                                                                                                                                                                                                                                                                                                                      |
| M26      | Pie, sausage roll, chiko roll                             | Chiko roll<br>Meat pie<br>Sausage roll          | Chiko roll, deep fired<br>Pie, meat.<br>Pie, steak<br>Sausage roll,                                                                                                                                                                                                                        | Pie, savoury<br>Sausage roll<br>Chiko roll                                                                                                                                                                                                                                                                                                  |
| M27      | Hot dog                                                   | Hot dog                                         | -                                                                                                                                                                                                                                                                                          | Hot dog,                                                                                                                                                                                                                                                                                                                                    |
| M28      | Savoury pastries eg, spinach and cheese triangles         | Other savoury pastries                          | Cannelloni, spinach and ricotta<br>Curry puff, beef,<br>Dim sim, meat and vegetable filling<br>Dumpling, meat filled<br>Dumpling, prawn filled<br>Pastie, vegetable<br>Pastry, cheese filling.<br>Pastry, spinach and cheese filling .<br>Pastry, spring roll<br>Pastry, vegetable filling | Cannelloni, spinach and ricotta<br>Curry puff<br>Dim sim<br>Dumpling or wonton<br>Pastry, puff<br>Pastry, shortcrust style<br>Pastry, spring roll<br>Pastry, filled with salmon<br>Pastry, filled with spinach<br>Pastry, filled with spinach & cheese<br>Pastry, filled with vegetables<br>Pastry, filled with vegetables & meat<br>Samosa |
| M29      | Hash browns, potato scallops                              | Hash Brown,<br>Potato, gems<br>Potato, scallops | Potato, gems<br>Potato, hash brown<br>Potato, mashed & crumbed<br>Potato, scallop                                                                                                                                                                                                          | Potato, hash brown<br>Potato scallop<br>Potato, gem                                                                                                                                                                                                                                                                                         |
| O1       | Chips (not potato) eg. Twisties, corn chips, burger rings | Corn snacks and extruded snacks                 | Corn chips<br>Crisp or chip, soy<br>Crisp or chip, vegetable,<br>Crisp, savoury                                                                                                                                                                                                            | Beetroot crisps or chips<br>Chip or crisp, soy<br>Corn chips<br>Extruded snack<br>Grain waves wheat snack<br>Noodle snack<br>Pappadam<br>Popcorn                                                                                                                                                                                            |

| Question | FFQ Item                                                             | NNS (1995) Foods                                    | ANCNPAS (2007) Foods                                                            | NNPAS (2011-12) Foods                                                                                                                         |
|----------|----------------------------------------------------------------------|-----------------------------------------------------|---------------------------------------------------------------------------------|-----------------------------------------------------------------------------------------------------------------------------------------------|
|          |                                                                      |                                                     |                                                                                 | Pretzels<br>Rice crisps or chips<br>Vegetable crisps or chips                                                                                 |
| O2       | Potato chips or crisps eg. plain, salt and vinegar                   | Potato crisps                                       | Crisp or chip, potato<br>Potato straws                                          | Potato crisps or chips                                                                                                                        |
| O3       | Ice block – creamy eg. Paddle Pop, Magnum, Cornetto                  | Ice cream, individual bar, stick and cone varieties | Ice cream bar<br>Ice cream, stick                                               | Ice cream, bar<br>Ice cream, sandwich<br>Ice cream, stick<br>Ice cream cone<br>Ice cream,<br>Ice confection, stick, milk-based                |
| O4       | Ice block – water eg. Frosty Fruit, lemonade                         | Water ice confection, gelato                        | Gelato, various flavours, commercial<br>Ice confection, stick                   | Ice confection, stick, water-base<br>Ice confection, stick or tub, fruit juice or fruit flavoured<br>Gelato or sorbet                         |
| O5       | Chocolate eg. plain chocolate, Mars Bar, Snickers, Milky Way         | Chocolate and chocolate-based confectionery         | Chocolate or chocolate bar<br>Chocolate<br>Rocky Road<br>Turkish delight        | Bar,<br>Chocolate<br>Confectionery                                                                                                            |
| O6       | Lollies without chocolate eg. lollipops, snakes, Skittles, Starburst | Other confectionery                                 | Caramels<br>Honeycomb, plain<br>Liquorice<br>Marshmallow<br>Sugar confectionary | Honeycomb<br>Liquorice<br>Lolly<br>Lollipop or chupa chup<br>Marshmallow<br>Confectionery (no chocolate)<br>Turkish delight<br>Fruit, leather |
| O7       | Low fat salad dressing or mayonnaise                                 | Mayonnaise and salad dressing - low fat             | Dressing, reduced fat<br>Mayonnaise, low fat                                    | Dressing,...reduced/low fat<br>Dressing, vinegar based<br>Mayonnaise,...reduced/low fat                                                       |

| Question | FFQ Item                                   | NNS (1995) Foods                                | ANCNPAS (2007) Foods                                                      | NNPAS (2011-12) Foods                                                        |
|----------|--------------------------------------------|-------------------------------------------------|---------------------------------------------------------------------------|------------------------------------------------------------------------------|
| O8       | Salad dressing or mayonnaise - not low fat | Mayonnaise and salad dressing - full fat        | Dressing, regular<br>Mayonnaise, full fat                                 | Dressing,...regular fat<br>Mayonnaise,...regular fat                         |
| O9       | Nuts eg. peanuts, almonds                  | Nuts (excluding coconut)                        | Nut<br>Nuts, mixed                                                        | Nut<br>Mixed nuts                                                            |
| O10      | Jam, honey, golden syrup, marmalade        | Honey, jam, lemon butter                        | Honey<br>Jam<br>Marmalade<br>Syrup, maple.<br>Syrup, golden               | Jam<br>Marmalade<br>Honey<br>Syrup, agave<br>Syrup, golden<br>Syrup, maple   |
| O11      | Peanut butter, Nutella                     | Peanut butter, chocolate and hazelnut spread    | Peanut butter, smooth & crunchy<br>Spread, hazelnut & chocolate flavoured | Peanut butter<br>Spread, hazelnut & chocolate flavoured                      |
| O12      | Vegemite, Mighty Mite, Promite, Marmite    | -                                               | Spread, yeast                                                             | Spread, yeast<br>Spread, vegetable & yeast extract                           |
| O13      | Tomato sauce, barbecue sauce               | Tomato and barbeque sauce                       | Sauce, tomato<br>Sauce, barbecue                                          | Sauce, tomato<br>Sauce, barbecue                                             |
| O14      | Devon, salami                              | Salami, chicken roll, stassburg, luncheon meats | Kabana or cabanossi<br>Salami                                             | Chicken, processed luncheon meat<br>Devon, processed luncheon meat<br>Salami |
| O15      | Bacon, ham                                 | Bacon<br>Ham                                    | Bacon<br>Ham                                                              | Bacon<br>Ham<br>Prosciutto                                                   |
| O16      | Eggs eg. boiled, scrambled                 | Total eggs, cooked                              | Egg                                                                       | Egg, chicken<br>Omelette, chicken egg                                        |
| O17      | Jelly                                      | Jelly, made up                                  | Jelly, made up                                                            | Jelly, sugar sweetened<br>Jelly, intense sweetened<br>Jelly crystals,        |

| Question   | FFQ Item                                                              | NNS (1995) Foods               | ANCNPAS (2007) Foods                                                                      | NNPAS (2011-12) Foods                                                                                                                                                                   |
|------------|-----------------------------------------------------------------------|--------------------------------|-------------------------------------------------------------------------------------------|-----------------------------------------------------------------------------------------------------------------------------------------------------------------------------------------|
| F1 +<br>F2 | Hot chips bought from a shop (eg. McDonald's fries) or cooked at home | Potato - hot chips             | Potato, chips<br>Potato, fries<br>Potato, wedged                                          | Potato, chips<br>Potato, fries<br>Potato, wedges                                                                                                                                        |
| F3         | Potato boiled, mashed, baked                                          | Potato - boiled, mashed, baked | Potato, baked<br>Potato, boiled<br>Potato, mashed,<br>Potato, peeled,<br>Potato, unpeeled | Potato, Sebago<br>Potato, mashed<br>Potato, peeled<br>Potato, unpeeled<br>Potato, coliban<br>Potato, desiree<br>Potato, new<br>Potato, Pontiac<br>Potato, pale skin<br>Potato, red skin |
| F4         | Pumpkin                                                               | Pumpkin                        | Pumpkin, peeled                                                                           | Pumpkin, peeled<br>Pumpkin, unpeeled<br>Pumpkin, butternut<br>Pumpkin, golden nugget<br>Pumpkin, Jarrahdale<br>Pumpkin, Queensland blue                                                 |
| F5         | Sweet potato                                                          | Sweet potato                   | Sweet potato,                                                                             | Sweet potato, orange flesh<br>Sweet potato, white flesh                                                                                                                                 |
| F6         | Cauliflower                                                           | Cauliflower                    | Cauliflower,                                                                              | Cauliflower, fresh or frozen                                                                                                                                                            |
| F7         | Green beans                                                           | Beans - green and snake        | Bean, green<br>Bean, broad<br>Beans, not further specified                                | Bean, broad<br>Bean, green                                                                                                                                                              |
| F8         | Spinach                                                               | Spinach and silverbeet         | Mixed greens<br>Spinach<br>Silverbeet                                                     | Silverbeet<br>Spinach<br>Mixed leafy greens                                                                                                                                             |
| F9         | Cabbage or brussel sprouts                                            | Cabbage and brussel sprouts    | Brussels sprout<br>Cabbage                                                                | Brussels sprout<br>Cabbage, red<br>Cabbage, white                                                                                                                                       |

| Question | FFQ Item                         | NNS (1995) Foods                         | ANCNPAS (2007) Foods                   | NNPAS (2011-12) Foods                                                                            |
|----------|----------------------------------|------------------------------------------|----------------------------------------|--------------------------------------------------------------------------------------------------|
|          |                                  |                                          |                                        | Cabbage, boiled<br>Cabbage, chinese<br>Cabbage, mustard<br>Cabbage, savoy<br>Cabbage, baked      |
| F10      | Peas                             | Peas (including snow peas)               | Pea, green<br>Pea, split<br>Snow pea   | Pea, green<br>Snow pea<br>Pea, split                                                             |
| F11      | Broccoli                         | Broccoli                                 | Broccoli                               | Broccoli, fresh or frozen                                                                        |
| F12      | Carrots                          | Carrots                                  | Carrot                                 | Carrot, baby<br>Carrot, matur<br>Carrot, peeled or unpeeled                                      |
| F13      | Zucchini, eggplant, squash       | Squash<br>Zucchini<br>Eggplant           | Eggplant<br>Okra<br>Zucchini<br>Squash | Eggplant, peeled or unpeeled<br>Squash<br>Zucchini, golden<br>Zucchini, green skin               |
| F14      | Capsicum                         | Capsicum                                 | Capsicum                               | Capsicum, green<br>Capsicum, red<br>Capsicum, fresh or frozen                                    |
| F15      | Corn, sweetcorn, corn on the cob | Corn                                     | Sweetcorn                              | Sweetcorn, baby<br>Sweetcorn, fresh or frozen<br>Sweetcorn, kernels<br>Sweetcorn, creamed        |
| F16      | Mushrooms                        | Mushrooms                                | Mushroom                               | Mushroom, common<br>Mushroom, oriental<br>Mushroom, fresh or frozen<br>Mushroom, canned in brine |
| F17      | Tomatoes                         | Tomatoes (includes canned and sun dried) | Tomato, common                         | Tomato, common<br>Tomato, raw<br>Tomato, fresh<br>Tomato, cherry or grape<br>Tomato, hydroponic  |

| Question | FFQ Item                                       | NNS (1995) Foods                                                                                          | ANCNPAS (2007) Foods                                                                                                 | NNPAS (2011-12) Foods                                                                                                                          |
|----------|------------------------------------------------|-----------------------------------------------------------------------------------------------------------|----------------------------------------------------------------------------------------------------------------------|------------------------------------------------------------------------------------------------------------------------------------------------|
|          |                                                |                                                                                                           |                                                                                                                      | Tomato, roma<br>Tomato, sundried or semi-sundried<br>Tomato, whole                                                                             |
| F18      | Lettuce                                        | Lettuce                                                                                                   | Lettuce, raw                                                                                                         | Lettuce, raw<br>Lettuce, cos<br>Lettuce, iceberg<br>Lettuce, mignonette<br>Lettuce, baked<br>Lettuce, boiled                                   |
| F19      | Celery, cucumber                               | Celery<br>Cucumber                                                                                        | Celery<br>Cucumber                                                                                                   | Celeriac<br>Celery<br>Cucumber, common<br>Cucumber, peeled or unpeeled<br>Cucumber, apple crystal<br>Cucumber, Lebanese<br>Cucumber, telegraph |
| F20      | Avocado                                        | Avocados                                                                                                  | Avocado, raw                                                                                                         | Avocado, raw<br>Avocado, cooked                                                                                                                |
| F21      | Onion, spring onion, leek                      | Onions, leeks, spring onions and shallots                                                                 | Onion, mature<br>Onion, spring Shallot<br>Leek                                                                       | Leek<br>Onion, mature<br>Onion, spring<br>Shallot                                                                                              |
| F22      | Soybeans, tofu                                 | Soy beans<br>Tofu                                                                                         | Bean, soya<br>Tofu –soy bean curd                                                                                    | Tofu (soy bean curd)<br>Bean, soya                                                                                                             |
| F23      | Baked beans                                    | Baked beans                                                                                               | Baked beans                                                                                                          | Baked beans                                                                                                                                    |
| F24      | Other beans, lentils eg. chickpeas, split peas | Other mature legumes and pulses<br>Other legume and pulse products<br>Other Beans - broad, butter, kidney | Bean, black<br>Bean, butter<br>Bean, lima<br>Bean, mixed<br>Bean, red kidney<br>Beans, refried<br>Chickpea<br>Lentil | Bean, black<br>Bean, cannellini<br>Bean, lima<br>Bean, mixed<br>Bean, red kidney<br>Bean, refried<br>Chickpea<br>Lentil, dried                 |

| Question | FFQ Item                                       | NNS (1995) Foods                                                     | ANCNPAS (2007) Foods                                                                                                                                                                                                                                                                                             | NNPAS (2011-12) Foods                                                                                                                                                                               |
|----------|------------------------------------------------|----------------------------------------------------------------------|------------------------------------------------------------------------------------------------------------------------------------------------------------------------------------------------------------------------------------------------------------------------------------------------------------------|-----------------------------------------------------------------------------------------------------------------------------------------------------------------------------------------------------|
|          |                                                |                                                                      |                                                                                                                                                                                                                                                                                                                  | Lentil, green or brown<br>Lentil, red                                                                                                                                                               |
| F25      | Canned fruit eg.<br>peaches, Two fruits        | Fruit - canned, mixed<br>Fruit - canned single<br>Total canned fruit | Apple, canned in syrup<br>Apricot, canned<br>Peach, canned<br>Pear, canned<br>Fruit, canned                                                                                                                                                                                                                      | Apple, canned or puree<br>Apricot, canned...<br>Fruit, puree or stewed<br>Mixed fruit<br>Peach, canned...<br>Pear, canned...<br>Pineapple, canned...<br>Strawberry, canned...<br>Mixed berry, puree |
| F26      | Fruit salad                                    | Fruit salad (not canned)                                             | Fruit salad                                                                                                                                                                                                                                                                                                      | Fruit salad,                                                                                                                                                                                        |
| F27      | Dried fruit eg.<br>sultanas, dried<br>apricots | Dried fruit, preserved fruit                                         | Apple, dried<br>Apricot, dried<br>Banana chip<br>Blueberry, dried<br>Berries, mixed -strawberry, raspberry,<br>blueberry, blackberry-, dried<br>Cranberry, dried<br>Currant, dried<br>Date, dried<br>Fig, dried<br>Mango, dried<br>Mixed fruit, dried<br>Pineapple, dried<br>Prune –dried plum<br>Sultana, dried | Apple, dried<br>Apricot, dried<br>Banana chip<br>Cranberry, dried<br>Currant, dried<br>Date, dried<br>Fig, dried<br>Mixed dried fruit<br>Prune (dried plum)<br>Sultana                              |
| F28      | Apple or pear                                  | Total apple and pear                                                 | Apple, green skin<br>Apple, peeled, raw<br>Apple, red skin<br>Pear, raw                                                                                                                                                                                                                                          | Apple, green skin<br>Apple, red skin<br>Apple, peeled<br>Apple, unpeeled<br>Apple, raw<br>Apple, fuji                                                                                               |

| Question | FFQ Item                          | NNS (1995) Foods                      | ANCNPAS (2007) Foods                                                         | NNPAS (2011-12) Foods                                                                                                                                                                                                                                                                |
|----------|-----------------------------------|---------------------------------------|------------------------------------------------------------------------------|--------------------------------------------------------------------------------------------------------------------------------------------------------------------------------------------------------------------------------------------------------------------------------------|
|          |                                   |                                       |                                                                              | Apple, golden delicious<br>Apple, granny-smith<br>Apple, Jonathon<br>Apple, pink lady<br>Apple, red delicious<br>Apple, royal gala<br>Apple, bonza<br>Pear, nashi,<br>Pear, peeled<br>Pear, unpeeled<br>Pear, raw<br>Pear, brown<br>Pear, packhams triumph<br>Pear, william bartlett |
| F29      | Orange, mandarin, grapefruit      | Total oranges, mandarin, grapefruit   | Mandarin<br>Grapefruit<br>Orange                                             | Orange, navel (all varieties)<br>Orange, Valencia<br>Orange, peeled<br>Mandarin<br>Grapefruit                                                                                                                                                                                        |
| F30      | Banana                            | Bananas                               | Banana, cavendish, peeled, raw                                               | Banana, Cavendish<br>Banana, lady finger or sugar                                                                                                                                                                                                                                    |
| SF1      | Peach, nectarine, plum or apricot | Apricot<br>Nectarine<br>Peach<br>Plum | Apricot, fresh, raw<br>Nectarine, unpeeled, raw<br>Peach, fresh, raw<br>Plum | Peach, yellow<br>Peach, white<br>Peach, peeled<br>Peach, unpeeled<br>Nectarine, yellow<br>Nectarine, white<br>Plum<br>Apricot                                                                                                                                                        |
| SF2      | Mango or paw-paw                  | Total mango and pawpaw                | Mango, peeled<br>Pawpaw                                                      | Mango<br>Pawpaw (papaya)                                                                                                                                                                                                                                                             |
| SF3      | Pineapple                         | Pineapples                            | Pineapple, fresh                                                             | Pineapple (cayenne)                                                                                                                                                                                                                                                                  |

| Question | FFQ Item                                        | NNS (1995) Foods                        | ANCNPAS (2007) Foods                                                                                                                                                                 | NNPAS (2011-12) Foods                                                                                                                                                                                                                               |
|----------|-------------------------------------------------|-----------------------------------------|--------------------------------------------------------------------------------------------------------------------------------------------------------------------------------------|-----------------------------------------------------------------------------------------------------------------------------------------------------------------------------------------------------------------------------------------------------|
| SF4      | Grapes, strawberries, blueberries               | Total grapes, strawberries, blueberries | Berries, mixed -strawberry, raspberry, blueberry, blackberry-, fresh, raw<br>Blueberry, fresh<br>Boysenberry, fresh<br>Grape, raw<br>Mulberry, fresh, raw<br>Raspberry<br>Strawberry | Grape, black muscatel<br>Grape, black sultana<br>Grape, cornichon<br>Grape, red globe<br>Grape, Thompson seedless or sultana<br>Grape, Waltham cross<br>Grape, raw<br>Mixed berry<br>Mulberry<br>Raspberry<br>Strawberry<br>Blackberry<br>Blueberry |
| SF5      | Melon eg. watermelon, rockmelon, honeydew melon | Total melon                             | Melon                                                                                                                                                                                | Melon, honey dew<br>Melon, rockmelon (cantaloupe)<br>Melon, watermelon<br>Melon, peeled                                                                                                                                                             |
