# Supplementary material for: Trends in Food and Beverage Portion Sizes in Australian Children; a Time-Series Analysis Comparing 2007 and 2011–2012 National Data
Source: MDPI journal article supplement (doi:10.3390/children4080069), 2017-08-04
Supplement: s1 [file s1]

**Table S2.** Basic demographic data of participants of the 2007 ANCNPAS and the 2011-12 NNPAS

|                                 | 2007<br>(n=1491)           | 2011-12<br>(n=675)         | 2007<br>(n=954)          | 2011-12<br>(n=578)       | 2007<br>(n=966) | 2011-12<br>(n=622)        | 2007<br>(n=1388) | 2011-12<br>(n=673)        |
|---------------------------------|----------------------------|----------------------------|--------------------------|--------------------------|-----------------|---------------------------|------------------|---------------------------|
| <b>% of total N</b>             | <b>31.1</b>                | <b>26.5</b>                | <b>19.9</b>              | <b>22.7</b>              | <b>20.1</b>     | <b>24.4</b>               | <b>28.9</b>      | <b>26.4</b>               |
| <b>Age group (years)</b>        | 2–4                        | 2–4                        | 5–8                      | 5–8                      | 9–12            | 9–12                      | 13–16            | 13–16                     |
| <b>Mean age, (SD)</b>           | 2.83 (0.74) <sup>***</sup> | 2.95 (0.82) <sup>***</sup> | 6.60 (1.12) <sup>*</sup> | 6.48 (1.11) <sup>*</sup> | 10.53 (1.10)    | 10.52 (1.14)              | 14.55 (1.01)     | 14.60 (1.15)              |
| <b>Sex</b>                      |                            |                            |                          |                          |                 |                           |                  |                           |
| Male                            | 52                         | 49                         | 51                       | 51                       | 47              | 50                        | 50               | 50                        |
| Female                          | 48                         | 51                         | 49                       | 49                       | 53              | 50                        | 50               | 50                        |
| <b>Weight status (%)</b>        |                            |                            |                          |                          |                 |                           |                  |                           |
| Underweight                     | 4.4                        | 5.8                        | 3.7                      | 4.2                      | 5.6             | 4.0                       | 4.1              | 2.4                       |
| Normal                          | 74.6                       | 56.1                       | 76.2                     | 58.1                     | 67.0            | 52.4                      | 70.4             | 58.4                      |
| Overweight                      | 15.4                       | 12.4                       | 13.6                     | 10.4                     | 19.4            | 20.3                      | 17.8             | 16.5                      |
| Obese                           | 3.4                        | 4.7                        | 6.2                      | 5.7                      | 7.2             | 8.7                       | 6.4              | 6.2                       |
| Unknown                         | 2.1                        | 20.9 <sup>***</sup>        | 0.3                      | 21.6 <sup>a***</sup>     | 0.8             | 14.6 <sup>a***</sup>      | 0.4              | 16.5 <sup>a***</sup>      |
| <b>Daily energy intake (MJ)</b> | 6.35 (1.86)                | 6.03 (2.02) <sup>*</sup>   | 7.57 (2.12)              | 7.20 (2.46) <sup>*</sup> | 8.91 (2.80)     | 8.39 (2.91) <sup>**</sup> | 10.02 (3.48)     | 9.19 (3.82) <sup>**</sup> |
| <b>Amount eaten (%)</b>         |                            |                            |                          |                          |                 |                           |                  |                           |
| Usual                           | 97.9                       | 84.7                       | 97.1                     | 82.0                     | 72.5            | 77.7                      | 72.3             | 70.7                      |
| Unusual                         | 2.1                        | 15.1 <sup>a***</sup>       | 2.9                      | 18.0 <sup>a***</sup>     | 27.5            | 22.3 <sup>a*</sup>        | 27.7             | 29.3                      |

<sup>a</sup> The distribution of the categorical variable significantly differs between 2007 and 2011-12

<sup>\*</sup> *p*-value <0.05, <sup>\*\*\*</sup> *p*-value <0.001
