# Supplementary material for: Trends in Food and Beverage Portion Sizes in Australian Children; a Time-Series Analysis Comparing 2007 and 2011–2012 National Data
Source: MDPI journal article supplement (doi:10.3390/children4080069), 2017-08-04
Supplement: s1 [file s1]

**Table S5: ACAES items that were consumed by less than 5 percent of the children in all NNPAS 2011–12 age groups**

| ACAES FFQ food group     | ACAES FFQ food item                         | Percentage (%)* |
|--------------------------|---------------------------------------------|-----------------|
| Drinks (D)               | Beer                                        | <0.1            |
|                          | Wine or wine coolers                        | 0.2             |
|                          | Spirits                                     | <0.1            |
| Dairy foods (DF)         | Soy milk                                    | 1.5             |
|                          | Skim milk                                   | 4.0             |
|                          | Cream or sour cream                         | 2.1             |
|                          | Frozen yoghurt                              | 0.7             |
|                          | Cottage cheese or ricotta                   | 0.5             |
|                          | Cheese spread, cream cheese                 | 2.4             |
|                          |                                             |                 |
| Breads and cereal (B)    | Muesli                                      | 1.0             |
|                          | English muffin, bagel or crumpet            | 2.6             |
|                          | Other grains (couscous, burghul)            | 1.2             |
|                          | Noodles                                     | 2.3             |
| Sweets and snacks (S)    | Sweet combination snacks                    | 0               |
|                          | Fruit bars                                  | 0.9             |
|                          | Snack bars                                  | 0.6             |
| Main meals (M)           | Plain pork                                  | 2.9             |
|                          | Liver – beef, calf, chicken                 | <0.1            |
|                          | Canned tuna, salmon, sardines incl. patties | 2.4             |
|                          | Other seafood                               | 1.1             |
|                          | Tacos, burritos, enchiladas                 | 2.0             |
|                          | Hot dog                                     | 2.1             |
|                          | Savoury pastries                            | 1.7             |
|                          | Hash browns, potato scallops                | 1.8             |
|                          | Salad dressing, low fat                     | 0.8             |
|                          | Jelly                                       | 2.2             |
| Fruit and vegetables (F) | Pumpkin                                     | 2.6             |
|                          | Sweet potato                                | 2.5             |
|                          | Cauliflower                                 | 2.1             |
|                          | Green beans                                 | 3.2             |
|                          | Spinach                                     | 1.6             |
|                          | Cabbage or Brussel sprouts                  | 0.7             |
|                          | Zucchini, eggplant or squash                | 1.3             |
|                          | Capsicum                                    | 1.5             |
|                          | Mushrooms                                   | 1.1             |
|                          | Avocado                                     | 1.9             |
|                          | Soybeans, tofu                              | 0.4             |
|                          | Baked beans                                 | 1.6             |
|                          | Other beans or lentils                      | 0.8             |
|                          | Canned fruit                                | 2.8             |
|                          | Fruit salad                                 | 2.6             |
|                          |                                             |                 |
|                          |                                             |                 |
| Seasonal fruits (FS)     | Mango or pawpaw                             | 1.9             |
|                          | Pineapple                                   | 0.8             |

\*Percentage of children in the entire 2011–12 population consuming the ACAES item
