# Supplementary material for: Trends in Food and Beverage Portion Sizes in Australian Children; a Time-Series Analysis Comparing 2007 and 2011–2012 National Data
Source: MDPI journal article supplement (doi:10.3390/children4080069), 2017-08-04
Supplement: s1 [file s1]

**Table S6a: Percentage of Australian children aged 2–4 years and 5–8 years consuming selected ACAES food categories, in the 2007 ANCNPAS and the 2011–12 NNPAS**

[illegible]

**Table S6a: Percentage of Australian children aged 2–4 years and 5–8 years consuming selected ACAES food categories, in the 2007 ANCNPAS and the 2011–12 NNPAS**

| ACAES FFQ Item      |                                                             | 2 – 4-year-old participants |                       |                         |                         |                       |                        | 5 – 8-year-old participants |                       |                        |                         |                       |                        |
|---------------------|-------------------------------------------------------------|-----------------------------|-----------------------|-------------------------|-------------------------|-----------------------|------------------------|-----------------------------|-----------------------|------------------------|-------------------------|-----------------------|------------------------|
|                     |                                                             | ANCNPAS (2007)              |                       |                         | NNPAS (2011–12)         |                       |                        | ANCNPAS (2007)              |                       |                        | NNPAS (2011–12)         |                       |                        |
|                     |                                                             | Female<br><i>n</i> =715     | Male<br><i>n</i> =776 | Total<br><i>n</i> =1491 | Female<br><i>n</i> =345 | Male<br><i>n</i> =330 | Total<br><i>n</i> =675 | Female<br><i>n</i> =474     | Male<br><i>n</i> =481 | Total<br><i>n</i> =955 | Female<br><i>n</i> =283 | Male<br><i>n</i> =295 | Total<br><i>n</i> =578 |
| <b>Dairy foods:</b> |                                                             |                             |                       |                         |                         |                       |                        |                             |                       |                        |                         |                       |                        |
| DF1 + DF3           | Soy Milk                                                    | 26<br>(3.6%)                | 29<br>(3.7%)          | 55<br>(3.7%)            | 8<br>(2.3%)             | 11<br>(3.3%)          | 19<br>(2.4%)           | 9<br>(1.9%)                 | 5<br>(1.0%)           | 14<br>(1.5%)           | 7<br>(2.5%)             | 3<br>(1.0%)           | 10<br>(1.7%)           |
| DF1 + DF3           | Whole Milk                                                  | 480<br>(67.1%)              | 549<br>(70.7%)        | 1029<br>(69.0%)         | 224<br>(64.9%)          | 214<br>(64.8%)        | 438<br>(64.9%)         | 236<br>(49.8%)              | 270<br>(56.1%)        | 506<br>(53.0%)         | 147<br>(51.9%)          | 152<br>(51.5%)        | 299<br>(51.7%)         |
| DF1 + DF3           | Reduced Fat Milk                                            | 123<br>(17.2%)              | 128<br>(16.5%)        | 251<br>(16.8%)          | 49<br>(14.2%)           | 35<br>(10.6%)         | 84<br>(12.4%)          | 95<br>(20.0%)               | 102<br>(21.2%)        | 197<br>(20.6%)         | 45<br>(15.9%)           | 45<br>(15.3%)         | 90<br>(15.6%)          |
| DF1 + DF3           | Skim Milk                                                   | 23<br>(3.2%)                | 19<br>(2.4%)          | 42<br>(2.8%)            | 16<br>(4.6%)            | 8<br>(2.4%)           | 24<br>(3.6%)           | 23<br>(4.9%)                | 23<br>(4.8%)          | 46<br>(4.8%)           | 9<br>(3.2%)             | 12<br>(4.1%)          | 21<br>(3.6%)           |
| DF2                 | Flavoured milk                                              | 55<br>(7.7%)                | 75<br>(9.7%)          | 130<br>(8.7%)           | 25<br>(7.2%)            | 25<br>(7.6%)          | 50<br>(7.4%)           | 69<br>(14.6%)               | 55<br>(11.4%)         | 124<br>(13.0%)         | 26<br>(9.2%)            | 32<br>(10.8%)         | 58<br>(10.0%)          |
| DF4                 | Cream or sour cream                                         | 25<br>(3.5%)                | 24<br>(3.1%)          | 51<br>(3.4%)            | 6<br>(1.7%)             | 4<br>(1.2%)           | 10<br>(1.5%)           | 21<br>(4.4%)                | 25<br>(5.2%)          | 46<br>(4.8%)           | 8<br>(2.8%)             | 5<br>(1.7%)           | 13<br>(2.2%)           |
| DF5                 | Ice cream                                                   | 120<br>(16.8%)              | 107<br>(13.8%)        | 227<br>(15.2%)          | 43<br>(12.5%)           | 46<br>(13.9%)         | 89<br>(13.2%)          | 117<br>(24.7%)              | 101<br>(20.1%)        | 218<br>(22.8%)         | 38<br>(13.4%)           | 53<br>(18.0%)         | 91<br>(15.7%)          |
| DF6                 | Frozen yoghurt                                              | 8<br>(1.1%)                 | 3<br>(0.4%)           | 11<br>(0.7%)            | 1<br>(0.3%)             | 3<br>(0.9%)           | 4<br>(0.6%)            | 6<br>(1.3%)                 | 5<br>(1.0%)           | 11<br>(1.2%)           | 1<br>(0.4%)             | 1<br>(0.3%)           | 2<br>(0.3%)            |
| DF7                 | Yoghurt (not frozen) plain or flavoured                     | 256<br>(35.8%)              | 272<br>(35.1%)        | 528<br>(35.4%)          | 114<br>(33.0%)          | 101<br>(30.6%)        | 215<br>(31.9%)         | 96<br>(20.3%)               | 105<br>(21.8%)        | 201<br>(21.0%)         | 57<br>(20.1%)           | 56<br>(19.0%)         | 113<br>(19.6%)         |
| DF8                 | Cottage cheese or ricotta                                   | 4<br>(0.6%)                 | 4<br>(0.5%)           | 8<br>(0.5%)             | 4<br>(1.2%)             | 0<br>(0%)             | 4<br>(0.6%)            | 0<br>(0%)                   | 3<br>(0.6%)           | 3<br>(0.3%)            | 2<br>(0.7%)             | 0<br>(0%)             | 2<br>(0.3%)            |
| DF9                 | Cheese including cheese on sandwiches, biscuits or on toast | 343<br>(48%)                | 371<br>(47.8%)        | 714<br>(47.9%)          | 123<br>(35.7%)          | 116<br>(35.2%)        | 239<br>(35.4%)         | 177<br>(37.3%)              | 198<br>(41.2%)        | 375<br>(39.3%)         | 83<br>(29.3%)           | 93<br>(31.5%)         | 176<br>(30.4%)         |

**Table S6a: Percentage of Australian children aged 2–4 years and 5–8 years consuming selected ACAES food categories, in the 2007 ANCNPAS and the 2011–12 NNPAS**

|                           |                                       | 2 – 4-year-old participants |                |                 |                 |                |                | 5 – 8-year-old participants |                |                |                 |                |                |
|---------------------------|---------------------------------------|-----------------------------|----------------|-----------------|-----------------|----------------|----------------|-----------------------------|----------------|----------------|-----------------|----------------|----------------|
| ACAES FFQ Item            |                                       | ANCNPAS (2007)              |                |                 | NNPAS (2011–12) |                |                | ANCNPAS (2007)              |                |                | NNPAS (2011–12) |                |                |
|                           |                                       | Female<br>n=715             | Male<br>n=776  | Total<br>n=1491 | Female<br>n=345 | Male<br>n=330  | Total<br>n=675 | Female<br>n=474             | Male<br>n=481  | Total<br>n=955 | Female<br>n=283 | Male<br>n=295  | Total<br>n=578 |
| DF10                      | Cheese spread, cream cheese           | 43<br>(6%)                  | 42<br>(5.4%)   | 85<br>(5.7%)    | 8<br>(2.3%)     | 8<br>(2.4%)    | 16<br>(2.4%)   | 24<br>(5.1%)                | 15<br>(3.1%)   | 39<br>(4.1%)   | 9<br>(3.2%)     | 9<br>(3.1%)    | 18<br>(3.1%)   |
| <b>Breads and Cereal:</b> |                                       |                             |                |                 |                 |                |                |                             |                |                |                 |                |                |
| B1                        | Muesli                                | 12<br>(1.7%)                | 13<br>(1.7%)   | 25<br>(1.7%)    | 1<br>(0.3%)     | 4<br>(1.2%)    | 5<br>(0.7%)    | 4<br>(0.8%)                 | 3<br>(0.6%)    | 7<br>(0.7%)    | 2<br>(0.7%)     | 3<br>(1.0%)    | 5<br>(0.9%)    |
| B2                        | Cooked porridge                       | 55<br>(7.7%)                | 55<br>(7.1%)   | 110<br>(7.4%)   | 37<br>(10.7%)   | 24<br>(7.3%)   | 61<br>(9.0%)   | 29<br>(6.1%)                | 16<br>(3.3%)   | 45<br>(4.7%)   | 15<br>(5.3%)    | 22<br>(7.5%)   | 37<br>(6.4%)   |
| B3                        | Breakfast cereal                      | 418<br>(58.5%)              | 462<br>(59.5%) | 880<br>(59%)    | 174<br>(50.4%)  | 168<br>(50.9%) | 342<br>(50.7%) | 240<br>(50.6%)              | 312<br>(64.9%) | 552<br>(57.8%) | 136<br>(48.1%)  | 156<br>(52.9%) | 292<br>(50.5%) |
| B5                        | Bread, pita bread, roll – White       | 336<br>(47.0%)              | 395<br>(50.9%) | 731<br>(49.0%)  | 141<br>(40.9%)  | 140<br>(42.4%) | 281<br>(41.6%) | 271<br>(57.2%)              | 273<br>(56.7%) | 544<br>(57%)   | 154<br>(54.4%)  | 162<br>(54.9%) | 316<br>(54.7%) |
| B5                        | Bread, pita bread, roll – Mixed Grain | 84<br>(11.7%)               | 122<br>(15.7%) | 206<br>(13.8%)  | 37<br>(10.7%)   | 52<br>(15.8%)  | 89<br>(13.2%)  | 51<br>(10.8%)               | 45<br>(9.4%)   | 96<br>(10.1%)  | 26<br>(9.2%)    | 26<br>(8.8%)   | 52<br>(9.0%)   |
| B5                        | Bread, pita bread, roll - Wholemeal   | 198<br>(27.7%)              | 179<br>(23.1%) | 377<br>(25.3%)  | 81<br>(23.5%)   | 69<br>(20.9%)  | 150<br>(22.2%) | 85<br>(17.9%)               | 107<br>(22.2%) | 192<br>(20.1%) | 51<br>(18.0%)   | 56<br>(19.0%)  | 107<br>(18.5%) |
| B6                        | English muffin, bagel or crumpet      | 34<br>(4.8%)                | 32<br>(4.1%)   | 66<br>(4.4%)    | 11<br>(3.2%)    | 4<br>(1.2%)    | 15<br>(2.2%)   | 18<br>(3.8%)                | 17<br>(3.5%)   | 35<br>(3.7%)   | 6<br>(2.1%)     | 6<br>(2.0%)    | 12<br>(2.1%)   |
| B7                        | Rice                                  | 112<br>(15.7%)              | 115<br>(14.8%) | 227<br>(15.2%)  | 60<br>(17.4%)   | 75<br>(22.7%)  | 135<br>(20.0%) | 68<br>(14.3%)               | 59<br>(12.3%)  | 127<br>(13.3%) | 49<br>(17.3%)   | 47<br>(15.9%)  | 96<br>(16.6%)  |
| B8                        | Other grains eg. cous cous, burghul   | 7<br>(1.0%)                 | 5<br>(0.6%)    | 12<br>(0.8%)    | 4<br>(1.2%)     | 10<br>(3.0%)   | 14<br>(2.1%)   | 2<br>(0.4%)                 | 1<br>(0.2%)    | 3<br>(0.3%)    | 1<br>(0.4%)     | 2<br>(0.7%)    | 3<br>(0.5%)    |
| B9                        | Noodles                               | 9<br>(1.3%)                 | 19<br>(2.4%)   | 28<br>(1.9%)    | 6<br>(1.7%)     | 7<br>(2.1%)    | 13<br>(1.9%)   | 7<br>(1.5%)                 | 9<br>(1.9%)    | 16<br>(1.7%)   | 5<br>(1.8%)     | 8<br>(2.7%)    | 13<br>(2.2%)   |

**Table S6a: Percentage of Australian children aged 2–4 years and 5–8 years consuming selected ACAES food categories, in the 2007 ANCNPAS and the 2011–12 NNPAS**

[illegible]

**Table S6a: Percentage of Australian children aged 2–4 years and 5–8 years consuming selected ACAES food categories, in the 2007 ANCNPAS and the 2011–12 NNPAS**

|                          |                                                       | 2 – 4-year-old participants |                       |                         |                         |                       |                        | 5 – 8-year-old participants |                       |                        |                         |                       |                        |
|--------------------------|-------------------------------------------------------|-----------------------------|-----------------------|-------------------------|-------------------------|-----------------------|------------------------|-----------------------------|-----------------------|------------------------|-------------------------|-----------------------|------------------------|
| ACAES FFQ Item           |                                                       | ANCNPAS (2007)              |                       |                         | NNPAS (2011–12)         |                       |                        | ANCNPAS (2007)              |                       |                        | NNPAS (2011–12)         |                       |                        |
|                          |                                                       | Female<br><i>n</i> =715     | Male<br><i>n</i> =776 | Total<br><i>n</i> =1491 | Female<br><i>n</i> =345 | Male<br><i>n</i> =330 | Total<br><i>n</i> =675 | Female<br><i>n</i> =474     | Male<br><i>n</i> =481 | Total<br><i>n</i> =955 | Female<br><i>n</i> =283 | Male<br><i>n</i> =295 | Total<br><i>n</i> =578 |
| S9                       | Snack noodles                                         | 29<br>(4.1%)                | 25<br>(3.2%)          | 54<br>(3.6%)            | 14<br>(4.1%)            | 13<br>(3.9%)          | 27<br>(4.0%)           | 33<br>(7%)                  | 31<br>(6.4%)          | 64<br>(6.7%)           | 13<br>(4.6%)            | 13<br>(4.4%)          | 26<br>(4.5%)           |
| S10                      | Fruit bars                                            | 0<br>(0%)                   | 0<br>(0%)             | 0<br>(0%)               | 4<br>(1.2%)             | 2<br>(0.6%)           | 6<br>(0.9%)            | 0<br>(0%)                   | 0<br>(0%)             | 0<br>(0%)              | 3<br>(1.1%)             | 2<br>(0.7%)           | 5<br>(0.9%)            |
| S11                      | Snack bars                                            | 42<br>(5.9%)                | 46<br>(5.9%)          | 88<br>(5.9%)            | 0<br>(0%)               | 2<br>(0.6%)           | 2<br>(0.3%)            | 27<br>(5.7%)                | 39<br>(8.1%)          | 66<br>(6.9%)           | 3<br>(1.1%)             | 2<br>(0.7%)           | 5<br>(0.9%)            |
| S12                      | Muesli bars                                           | 56<br>(7.8%)                | 59<br>(7.6%)          | 115<br>(7.7%)           | 34<br>(10.0%)           | 33<br>(10.0%)         | 67<br>(10.0%)          | 54<br>(11.4%)               | 630<br>(13.1%)        | 117<br>(12.3%)         | 37<br>(13.1%)           | 53<br>(18.0%)         | 90<br>(15.6%)          |
| <b>Main Meals:</b>       |                                                       |                             |                       |                         |                         |                       |                        |                             |                       |                        |                         |                       |                        |
| M1                       | Mince dish                                            | 121<br>(16.9%)              | 120<br>(15.5%)        | 241<br>(16.2%)          | 39<br>(11.3%)           | 45<br>(13.6%)         | 84<br>(12.4%)          | 53<br>(11.2%)               | 79<br>(16.4%)         | 132<br>(13.8%)         | 26<br>(9.2%)            | 26<br>(8.8%)          | 52<br>(9.0%)           |
| M2-3,<br>5 M11–<br>12,14 | Mixed meat dish                                       | 12<br>(1.7%)                | 20<br>(2.5%)          | 32<br>(2.2%)            | 15<br>(4.3%)            | 15<br>(4.5%)          | 30<br>(4.4%)           | 6<br>(1.3%)                 | 6<br>(1.2%)           | 12<br>(1.2%)           | 5<br>(1.8%)             | 21<br>(7.1%)          | 26<br>(4.5%)           |
| M4                       | Plain meat (beef or lamb) WITHOUT vegetables or salad | 116<br>(16.2%)              | 123<br>(15.9%)        | 239<br>(16.0%)          | 30<br>(8.7%)            | 29<br>(8.8%)          | 59<br>(8.7%)           | 65<br>(13.7%)               | 79<br>(16.4%)         | 144<br>(15.1%)         | 24<br>(8.5%)            | 24<br>(8.1%)          | 48<br>(8.3%)           |
| M6-7,<br>M10             | Mixed chicken dish                                    | 29<br>(4.0%)                | 26<br>(3.4%)          | 55<br>(3.7%)            | 12<br>(3.5%)            | 14<br>(4.2%)          | 26<br>(3.9%)           | 17<br>(3.6%)                | 16<br>(3.3%)          | 33<br>(3.5%)           | 7<br>(2.5%)             | 18<br>(6.1%)          | 25<br>(4.3%)           |
| M8                       | Chicken crumbed                                       | 69<br>(9.7%)                | 49<br>(6.3%)          | 118<br>(7.9%)           | 39<br>(11.3%)           | 40<br>(12.1%)         | 79<br>(11.7%)          | 57<br>(12.0%)               | 51<br>(10.6%)         | 108<br>(11.3%)         | 39<br>(13.8%)           | 27<br>(9.2%)          | 66<br>(11.4%)          |
| M9                       | Plain chicken WITHOUT vegetables                      | 115<br>(16.1%)              | 131<br>(16.9%)        | 246<br>(16.5%)          | 53<br>(15.4%)           | 43<br>(13.0%)         | 96<br>(14.2%)          | 78<br>(16.5%)               | 81<br>(16.8%)         | 159<br>(16.6%)         | 34<br>(12.0%)           | 25<br>(8.5%)          | 59<br>(10.2%)          |

**Table S6a: Percentage of Australian children aged 2–4 years and 5–8 years consuming selected ACAES food categories, in the 2007 ANCNPAS and the 2011–12 NNPAS**

| ACAES FFQ Item |                                                             | 2 – 4-year-old participants |                |                 |                 |               |                | 5 – 8-year-old participants |               |                |                 |               |                |
|----------------|-------------------------------------------------------------|-----------------------------|----------------|-----------------|-----------------|---------------|----------------|-----------------------------|---------------|----------------|-----------------|---------------|----------------|
|                |                                                             | ANCNPAS (2007)              |                |                 | NNPAS (2011–12) |               |                | ANCNPAS (2007)              |               |                | NNPAS (2011–12) |               |                |
|                |                                                             | Female<br>n=715             | Male<br>n=776  | Total<br>n=1491 | Female<br>n=345 | Male<br>n=330 | Total<br>n=675 | Female<br>n=474             | Male<br>n=481 | Total<br>n=955 | Female<br>n=283 | Male<br>n=295 | Total<br>n=578 |
| M13            | Plain pork<br>WITHOUT<br>vegetables                         | 15<br>(2.1%)                | 21<br>(2.7%)   | 36<br>(2.4%)    | 5<br>(1.4%)     | 7<br>(2.1%)   | 12<br>(1.8%)   | 12<br>(2.5%)                | 14<br>(2.9%)  | 26<br>(2.7%)   | 7<br>(2.5%)     | 9<br>(3.1%)   | 16<br>(2.8%)   |
| M15            | Liver – beef,<br>calf, chicken                              | 0<br>(0%)                   | 0<br>(0%)      | 0<br>(0%)       | 0<br>(0%)       | 0<br>(0%)     | 0<br>(0%)      | 2<br>(0.4%)                 | 1<br>(0.2%)   | 3<br>(0.3%)    | 0<br>(0%)       | 1<br>(0.3%)   | 1<br>(0.2%)    |
| M16-<br>17     | Fish                                                        | 61<br>(8.5%)                | 60<br>(7.7%)   | 121<br>(8.1%)   | 25<br>(7.2%)    | 27<br>(8.2%)  | 52<br>(7.7%)   | 41<br>(8.6%)                | 29<br>(6.0%)  | 70<br>(7.3%)   | 23<br>(8.1%)    | 19<br>(6.4%)  | 42<br>(7.3%)   |
| M18            | Canned tuna,<br>salmon,<br>sardines<br>including<br>patties | 25<br>(3.5%)                | 29<br>(3.7%)   | 54<br>(3.6%)    | 9<br>(2.6%)     | 4<br>(1.2%)   | 13<br>(1.9%)   | 19<br>(4.0%)                | 17<br>(3.5%)  | 36<br>(3.8%)   | 6<br>(2.1%)     | 3<br>(1.0%)   | 9<br>(1.6%)    |
| M19            | Other seafood                                               | 9<br>(1.3%)                 | 14<br>(1.8%)   | 23<br>(1.5%)    | 2<br>(0.6%)     | 5<br>(1.5%)   | 7<br>(1.0%)    | 10<br>(2.1%)                | 14<br>(2.9%)  | 24<br>(2.5%)   | 1<br>(0.4%)     | 5<br>(1.7%)   | 6<br>(1.0%)    |
| M20-<br>21     | Creamy or<br>Clear soup                                     | 49<br>(6.9%)                | 55<br>(7.1%)   | 104<br>(7.0%)   | 34<br>(9.9%)    | 18<br>(5.5%)  | 52<br>(7.7%)   | 34<br>(7.2%)                | 29<br>(6.0%)  | 63<br>(6.6%)   | 15<br>(5.3%)    | 18<br>(6.1%)  | 33<br>(5.7%)   |
| M22            | Tacos, burritos,<br>enchiladas                              | 7<br>(1.0%)                 | 7<br>(0.9%)    | 14<br>(0.9%)    | 5<br>(1.4%)     | 0<br>(0%)     | 5<br>(0.7%)    | 10<br>(2.1%)                | 12<br>(2.5%)  | 22<br>(2.3%)   | 10<br>(3.5%)    | 9<br>(3.1%)   | 19<br>(3.3%)   |
| M23            | Sausages,<br>frankfurts, Pluto<br>Pup                       | 89<br>(12.4%)               | 104<br>(13.4%) | 193<br>(12.9%)  | 39<br>(11.3%)   | 31<br>(9.4%)  | 70<br>(10.4%)  | 59<br>(12.4%)               | 69<br>(14.3%) | 128<br>(13.4%) | 28<br>(10.0%)   | 38<br>(12.9%) | 66<br>(11.4%)  |
| M24            | Hamburger - all<br>types                                    | 7<br>(1%)                   | 11<br>(1.4%)   | 18<br>(1.2%)    | 13<br>(3.8%)    | 10<br>(3.0%)  | 23<br>(3.4%)   | 15<br>(3.2%)                | 23<br>(4.8%)  | 38<br>(4.0%)   | 14<br>(4.9%)    | 14<br>(4.7%)  | 28<br>(4.8%)   |
| M25            | Pizza                                                       | 27<br>(3.8%)                | 33<br>(4.3%)   | 60<br>(4.0%)    | 22<br>(6.4%)    | 22<br>(6.7%)  | 44<br>(6.5%)   | 34<br>(7.2%)                | 29<br>(6.0%)  | 63<br>(6.6%)   | 20<br>(7.1%)    | 23<br>(7.8%)  | 43<br>(7.4%)   |
| M26            | Pie, sausage<br>roll, chiko roll                            | 28<br>(3.9%)                | 53<br>(6.8%)   | 81<br>(5.4%)    | 20<br>(5.8%)    | 18<br>(5.5%)  | 38<br>(5.6%)   | 54<br>(11.4%)               | 42<br>(8.7%)  | 96<br>(10.1%)  | 18<br>(6.4%)    | 21<br>(7.1%)  | 39<br>(6.7%)   |

**Table S6a: Percentage of Australian children aged 2–4 years and 5–8 years consuming selected ACAES food categories, in the 2007 ANCNPAS and the 2011–12 NNPAS**

|                     |                                            | 2 – 4-year-old participants |                |                 |                 |               |                | 5 – 8-year-old participants |                |                |                 |               |                |
|---------------------|--------------------------------------------|-----------------------------|----------------|-----------------|-----------------|---------------|----------------|-----------------------------|----------------|----------------|-----------------|---------------|----------------|
| ACAES FFQ Item      |                                            | ANCNPAS (2007)              |                |                 | NNPAS (2011–12) |               |                | ANCNPAS (2007)              |                |                | NNPAS (2011–12) |               |                |
|                     |                                            | Female<br>n=715             | Male<br>n=776  | Total<br>n=1491 | Female<br>n=345 | Male<br>n=330 | Total<br>n=675 | Female<br>n=474             | Male<br>n=481  | Total<br>n=955 | Female<br>n=283 | Male<br>n=295 | Total<br>n=578 |
| M27                 | Hot dog                                    | -                           | -              | -               | 3<br>(0.9%)     | 0<br>(0%)     | 3<br>(0.4%)    | -                           | -              | -              | 3<br>(1.1%)     | 13<br>(4.4%)  | 16<br>(2.8%)   |
| M28                 | Savoury pastries                           | 13<br>(1.8%)                | 24<br>(3.1%)   | 37<br>(2.5%)    | 5<br>(1.4%)     | 7<br>(2.1%)   | 12<br>(1.8%)   | 12<br>(2.5%)                | 13<br>(2.7%)   | 25<br>(2.6%)   | 3<br>(1.1%)     | 3<br>(1.0%)   | 6<br>(1.0%)    |
| M29                 | Hash browns, potato scallops               | 7<br>(1.0%)                 | 11<br>(1.4%)   | 18<br>(1.2%)    | 7<br>(2.0%)     | 5<br>(1.5%)   | 12<br>(1.8%)   | 9<br>(1.9%)                 | 14<br>(2.9%)   | 23<br>(2.4%)   | 2<br>(0.7%)     | 3<br>(1.0%)   | 5<br>(0.9%)    |
| <b>Other Foods:</b> |                                            |                             |                |                 |                 |               |                |                             |                |                |                 |               |                |
| O1                  | Chips (not potato)                         | 61<br>(8.5%)                | 75<br>(9.7%)   | 136<br>(9.1%)   | 35<br>(10.1%)   | 27<br>(8.2%)  | 62<br>(9.2%)   | 47<br>(9.9%)                | 65<br>(13.5%)  | 112<br>(11.7%) | 39<br>(13.8%)   | 46<br>(15.6%) | 85<br>(14.7%)  |
| O2                  | Potato chips or crisps                     | 69<br>(9.7%)                | 70<br>(9.0%)   | 139<br>(9.3%)   | 34<br>(9.9%)    | 34<br>(10.3%) | 68<br>(10.1%)  | 85<br>(17.9%)               | 97<br>(20.2%)  | 182<br>(19.1%) | 50<br>(17.7%)   | 45<br>(15.3%) | 95<br>(16.4%)  |
| O3                  | Ice block – creamy                         | 21<br>(2.9%)                | 26<br>(3.4%)   | 47<br>(3.2%)    | 9<br>(2.6%)     | 11<br>(3.3%)  | 20<br>(3.0%)   | 23<br>(4.9%)                | 23<br>(4.8%)   | 46<br>(4.8%)   | 18<br>(6.4%)    | 24<br>(8.1%)  | 42<br>(7.3%)   |
| O4                  | Ice block – water                          | 28<br>(3.9%)                | 36<br>(4.6%)   | 65<br>(4.4%)    | 25<br>(7.2%)    | 20<br>(6.1%)  | 45<br>(6.7%)   | 40<br>(8.4%)                | 35<br>(7.3%)   | 75<br>(7.9%)   | 36<br>(12.7%)   | 31<br>(10.5%) | 67<br>(11.6%)  |
| O5                  | Chocolate                                  | 142<br>(19.9%)              | 145<br>(18.7%) | 287<br>(19.2%)  | 63<br>(18.3%)   | 40<br>(12.1%) | 103<br>(15.3%) | 130<br>(27.4%)              | 128<br>(26.6%) | 258<br>(27.0%) | 57<br>(20.1%)   | 52<br>(17.6%) | 109<br>(18.9%) |
| O6                  | Lollies without chocolate                  | 114<br>(15.9%)              | 104<br>(13.4%) | 218<br>(14.6%)  | 44<br>(12.8%)   | 47<br>(14.2%) | 91<br>(13.5%)  | 111<br>(23.4%)              | 103<br>(21.4%) | 214<br>(22.4%) | 52<br>(18.4%)   | 53<br>(18.0%) | 105<br>(18.2%) |
| O7                  | Low fat salad dressing or mayonnaise       | 11<br>(1.5%)                | 10<br>(1.3%)   | 21<br>(1.4%)    | 1<br>(0.3%)     | 0<br>(0%)     | 1<br>(0.1%)    | 5<br>(1.1%)                 | 11<br>(2.3%)   | 16<br>(1.7%)   | 1<br>(0.4%)     | 1<br>(0.3%)   | 2<br>(0.3%)    |
| O8                  | Salad dressing or mayonnaise - not low fat | 34<br>(4.8%)                | 24<br>(3.1%)   | 58<br>(3.9%)    | 12<br>(3.5%)    | 12<br>(3.6%)  | 24<br>(3.6%)   | 21<br>(4.4%)                | 24<br>(5.0%)   | 45<br>(4.7%)   | 11<br>(3.9%)    | 20<br>(6.8%)  | 31<br>(5.4%)   |
| O9                  | Nuts                                       | 34<br>(4.8%)                | 24<br>(3.1%)   | 58<br>(3.9%)    | 15<br>(4.3%)    | 19<br>(5.8%)  | 34<br>(5.0%)   | 18<br>(3.8%)                | 17<br>(3.5%)   | 35<br>(3.7%)   | 4<br>(1.4%)     | 12<br>(4.1%)  | 16<br>(2.8%)   |

**Table S6a: Percentage of Australian children aged 2–4 years and 5–8 years consuming selected ACAES food categories, in the 2007 ANCNPAS and the 2011–12 NNPAS**

| ACAES FFQ Item                  |                                                         | 2 – 4-year-old participants |                       |                         |                         |                       |                        | 5 – 8-year-old participants |                       |                        |                         |                       |                        |
|---------------------------------|---------------------------------------------------------|-----------------------------|-----------------------|-------------------------|-------------------------|-----------------------|------------------------|-----------------------------|-----------------------|------------------------|-------------------------|-----------------------|------------------------|
|                                 |                                                         | ANCNPAS (2007)              |                       |                         | NNPAS (2011–12)         |                       |                        | ANCNPAS (2007)              |                       |                        | NNPAS (2011–12)         |                       |                        |
|                                 |                                                         | Female<br><i>n</i> =715     | Male<br><i>n</i> =776 | Total<br><i>n</i> =1491 | Female<br><i>n</i> =345 | Male<br><i>n</i> =330 | Total<br><i>n</i> =675 | Female<br><i>n</i> =474     | Male<br><i>n</i> =481 | Total<br><i>n</i> =955 | Female<br><i>n</i> =283 | Male<br><i>n</i> =295 | Total<br><i>n</i> =578 |
| O10                             | Jam, honey,<br>golden syrup,<br>marmalade               | 180<br>(25.2%)              | 211<br>(27.2%)        | 391<br>(26.2%)          | 81<br>(23.5%)           | 75<br>(22.7%)         | 156<br>(23.1%)         | 104<br>(21.9%)              | 102<br>(21.2%)        | 206<br>(21.6%)         | 62<br>(21.9%)           | 66<br>(22.4%)         | 128<br>(22.1%)         |
| O11                             | Peanut butter,<br>Nutella                               | 97<br>(13.6%)               | 105<br>(13.5%)        | 202<br>(13.5%)          | 44<br>(12.8%)           | 54<br>(16.4%)         | 98<br>(14.5%)          | 76<br>(16.0%)               | 78<br>(16.2%)         | 154<br>(16.1%)         | 34<br>(12.0%)           | 35<br>(11.9%)         | 69<br>(11.9%)          |
| O12                             | Vegemite,<br>Mighty Mite,<br>Promite,<br>Marmite        | 214<br>(30.0%)              | 278<br>(35.8%)        | 492<br>(33.0%)          | 81<br>(23.5%)           | 88<br>(26.7%)         | 169<br>(25.0%)         | 124<br>(26.2%)              | 112<br>(23.3%)        | 236<br>(24.7%)         | 60<br>(21.2%)           | 58<br>(19.7%)         | 118<br>(20.4%)         |
| O13                             | Tomato sauce,<br>barbecue sauce                         | 134<br>(18.7%)              | 158<br>(20.4%)        | 292<br>(19.6%)          | 37<br>(10.7%)           | 46<br>(13.9%)         | 83<br>(12.3%)          | 126<br>(26.6%)              | 121<br>(25.2%)        | 247<br>(25.8%)         | 32<br>(11.3%)           | 49<br>(16.6%)         | 81<br>(14.0%)          |
| O14                             | Devon, salami                                           | 48<br>(6.7%)                | 57<br>(7.3%)          | 105<br>(7.0%)           | 10<br>(2.9%)            | 11<br>(3.3%)          | 21<br>(3.1%)           | 55<br>(11.6%)               | 37<br>(7.7%)          | 92<br>(9.6%)           | 13<br>(4.6%)            | 15<br>(5.1%)          | 28<br>(4.8%)           |
| O15                             | Bacon, ham                                              | 132<br>(18.5%)              | 148<br>(19.1%)        | 280<br>(18.8%)          | 52<br>(15.1%)           | 46<br>(13.9%)         | 98<br>(14.5%)          | 94<br>(19.8%)               | 112<br>(23.3%)        | 206<br>(21.5%)         | 55<br>(19.4%)           | 55<br>(18.6%)         | 110<br>(19.0%)         |
| O16                             | Eggs                                                    | 103<br>(14.4%)              | 100<br>(12.9%)        | 203<br>(13.6%)          | 47<br>(13.6%)           | 35<br>(10.6%)         | 82<br>(12.1%)          | 59<br>(12.4%)               | 65<br>(13.5%)         | 124<br>(13.0%)         | 46<br>(16.3%)           | 31<br>(10.5%)         | 77<br>(13.3%)          |
| O17                             | Jelly                                                   | 17<br>(2.4%)                | 30<br>(3.9%)          | 47<br>(3.2%)            | 6<br>(1.7%)             | 8<br>(2.4%)           | 14<br>(2.1%)           | 20<br>(4.2%)                | 11<br>(2.3%)          | 31<br>(3.2%)           | 7<br>(2.5%)             | 9<br>(3.1%)           | 16<br>(2.8%)           |
| <b>Fruit and<br/>Vegetables</b> |                                                         |                             |                       |                         |                         |                       |                        |                             |                       |                        |                         |                       |                        |
| F1-2                            | Hot chips<br>bought from a<br>shop or cooked<br>at home | 112<br>(15.7%)              | 113<br>(14.6%)        | 225<br>(15.1%)          | 61<br>(17.7%)           | 45<br>(13.6%)         | 106<br>(15.7%)         | 101<br>(21.3%)              | 96<br>(20.0%)         | 197<br>(20.6%)         | 50<br>(17.7%)           | 46<br>(15.6%)         | 96<br>(16.6%)          |
| F3                              | Potato boiled,<br>mashed, baked                         | 184<br>(25.7%)              | 203<br>(26.2%)        | 387<br>(30.0%)          | 59<br>(17.1%)           | 48<br>(14.5%)         | 107<br>(15.9%)         | 108<br>(22.8%)              | 102<br>(21.2%)        | 210<br>(22.0%)         | 47<br>(16.6%)           | 44<br>(14.9%)         | 91<br>(15.7%)          |
| F4                              | Pumpkin                                                 | 64<br>(9.0%)                | 59<br>(7.6%)          | 123<br>(8.2%)           | 12<br>(3.5%)            | 9<br>(2.7%)           | 26<br>(3.9%)           | 25<br>(5.3%)                | 27<br>(5.6%)          | 52<br>(5.4%)           | 5<br>(1.8%)             | 2<br>(0.7%)           | 7<br>(1.2%)            |

**Table S6a: Percentage of Australian children aged 2–4 years and 5–8 years consuming selected ACAES food categories, in the 2007 ANCNPAS and the 2011–12 NNPAS**

| ACAES FFQ Item |                                        | 2 – 4-year-old participants |                |                 |                 |               |                | 5 – 8-year-old participants |                |                |                 |               |                |
|----------------|----------------------------------------|-----------------------------|----------------|-----------------|-----------------|---------------|----------------|-----------------------------|----------------|----------------|-----------------|---------------|----------------|
|                |                                        | ANCNPAS (2007)              |                |                 | NNPAS (2011–12) |               |                | ANCNPAS (2007)              |                |                | NNPAS (2011–12) |               |                |
|                |                                        | Female<br>n=715             | Male<br>n=776  | Total<br>n=1491 | Female<br>n=345 | Male<br>n=330 | Total<br>n=675 | Female<br>n=474             | Male<br>n=481  | Total<br>n=955 | Female<br>n=283 | Male<br>n=295 | Total<br>n=578 |
| F5             | Sweet potato                           | 37<br>(5.2%)                | 30<br>(3.9%)   | 67<br>(4.5%)    | 10<br>(2.9%)    | 13<br>(3.9%)  | 23<br>(3.4%)   | 8<br>(1.7%)                 | 12<br>(2.5%)   | 20<br>(2.1%)   | 6<br>(2.1%)     | 13<br>(4.4%)  | 19<br>(3.3%)   |
| F6             | Cauliflower                            | 50<br>(7.0%)                | 41<br>(5.3%)   | 91<br>(6.1%)    | 5<br>(1.4%)     | 10<br>(3.0%)  | 15<br>(2.2%)   | 24<br>(5.1%)                | 27<br>(5.6%)   | 51<br>(5.3%)   | 3<br>(1.1%)     | 10<br>(3.4%)  | 13<br>(2.2%)   |
| F7             | Green beans                            | 51<br>(7.1%)                | 59<br>(7.6%)   | 110<br>(7.3%)   | 12<br>(3.5%)    | 9<br>(2.7%)   | 21<br>(3.1%)   | 36<br>(7.6%)                | 27<br>(5.6%)   | 63<br>(6.6%)   | 9<br>(3.2%)     | 9<br>(3.1%)   | 18<br>(3.1%)   |
| F8             | Spinach                                | 22<br>(3.1%)                | 13<br>(1.7%)   | 35<br>(2.3%)    | 3<br>(0.9%)     | 7<br>(2.1%)   | 10<br>(1.5%)   | 10<br>(2.1%)                | 9<br>(1.9%)    | 19<br>(2.0%)   | 4<br>(1.4%)     | 0<br>(0%)     | 4<br>(0.7%)    |
| F9             | Cabbage or<br>brussel sprouts          | 15<br>(2.1%)                | 21<br>(2.7%)   | 36<br>(2.4%)    | 2<br>(0.6%)     | 2<br>(0.6%)   | 4<br>(0.6%)    | 12<br>(2.5%)                | 10<br>(2.1%)   | 22<br>(2.3%)   | 3<br>(1.1%)     | 4<br>(1.4%)   | 7<br>(1.2%)    |
| F10            | Peas                                   | 107<br>(15.0%)              | 139<br>(17.9%) | 246<br>(16.5%)  | 27<br>(7.8%)    | 19<br>(4.8%)  | 46<br>(6.8%)   | 58<br>(12.2%)               | 53<br>(11.0%)  | 111<br>(11.6%) | 14<br>(4.9%)    | 15<br>(5.1%)  | 29<br>(5.0%)   |
| F11            | Broccoli                               | 114<br>(15.9%)              | 105<br>(13.5%) | 219<br>(14.7%)  | 16<br>(4.6%)    | 23<br>(7.0%)  | 39<br>(5.8%)   | 60<br>(12.7%)               | 66<br>(13.7%)  | 126<br>(13.2%) | 15<br>(5.3%)    | 21<br>(7.1%)  | 36<br>(6.2%)   |
| F12            | Carrots                                | 228<br>(31.9%)              | 268<br>(34.5%) | 496<br>(33.3%)  | 57<br>(16.5%)   | 52<br>(15.8%) | 109<br>(16.1%) | 153<br>(32.3%)              | 132<br>(27.4%) | 285<br>(29.8%) | 52<br>(18.4%)   | 46<br>(15.6%) | 98<br>(17.0%)  |
| F13            | Zucchini,<br>eggplant,<br>squash       | 38<br>(5.3%)                | 49<br>(6.3%)   | 87<br>(5.8%)    | 3<br>(0.9%)     | 7<br>(2.1%)   | 10<br>(1.5%)   | 16<br>(3.4%)                | 17<br>(3.5%)   | 33<br>(3.5%)   | 4<br>(1.4%)     | 7<br>(2.4%)   | 11<br>(1.9%)   |
| F14            | Capsicum                               | 39<br>(5.5%)                | 49<br>(6.3%)   | 88<br>(5.9%)    | 4<br>(1.2%)     | 3<br>(0.9%)   | 7<br>(1.0%)    | 35<br>(7.4%)                | 22<br>(4.6%)   | 57<br>(6.0%)   | 7<br>(2.5%)     | 2<br>(0.7%)   | 9<br>(1.6%)    |
| F15            | Corn,<br>sweetcorn,<br>corn on the cob | 104<br>(14.5%)              | 117<br>(15.1%) | 221<br>(14.8%)  | 27<br>(7.8%)    | 23<br>(7.0%)  | 50<br>(7.4%)   | 57<br>(12.0%)               | 45<br>(9.4%)   | 102<br>(10.7%) | 11<br>(3.9%)    | 22<br>(7.5%)  | 33<br>(5.7%)   |
| F16            | Mushrooms                              | 38<br>(5.3%)                | 45<br>(5.8%)   | 83<br>(5.6%)    | 5<br>(1.4%)     | 1<br>(0.3%)   | 6<br>(0.9%)    | 17<br>(3.6%)                | 15<br>(3.1%)   | 32<br>(3.4%)   | 3<br>(1.1%)     | 3<br>(1.0%)   | 6<br>(1.0%)    |
| F17            | Tomatoes                               | 111<br>(15.5%)              | 102<br>(13.1%) | 213<br>(14.3%)  | 37<br>(10.7%)   | 24<br>(7.3%)  | 61<br>(9.0%)   | 64<br>(13.5%)               | 66<br>(13.7%)  | 130<br>(13.6%) | 23<br>(8.1%)    | 25<br>(8.5%)  | 48<br>(8.3%)   |

**Table S6a: Percentage of Australian children aged 2–4 years and 5–8 years consuming selected ACAES food categories, in the 2007 ANCNPAS and the 2011–12 NNPAS**

| ACAES FFQ Item   |                                    | 2 – 4-year-old participants |                |                 |                 |                |                | 5 – 8-year-old participants |                |                |                 |                |                |
|------------------|------------------------------------|-----------------------------|----------------|-----------------|-----------------|----------------|----------------|-----------------------------|----------------|----------------|-----------------|----------------|----------------|
|                  |                                    | ANCNPAS (2007)              |                |                 | NNPAS (2011–12) |                |                | ANCNPAS (2007)              |                |                | NNPAS (2011–12) |                |                |
|                  |                                    | Female<br>n=715             | Male<br>n=776  | Total<br>n=1491 | Female<br>n=345 | Male<br>n=330  | Total<br>n=675 | Female<br>n=474             | Male<br>n=481  | Total<br>n=955 | Female<br>n=283 | Male<br>n=295  | Total<br>n=578 |
| F18              | Lettuce                            | 47<br>(6.6%)                | 31<br>(4.0%)   | 78<br>(5.2%)    | 9<br>(2.6%)     | 11<br>(3.3%)   | 20<br>(3.0%)   | 52<br>(11.0%)               | 65<br>(13.5%)  | 117<br>(12.3%) | 14<br>(4.9%)    | 20<br>(6.8%)   | 34<br>(5.9%)   |
| F19              | Celery,<br>cucumber                | 81<br>(11.3%)               | 74<br>(9.5%)   | 155<br>(10.4%)  | 21<br>(6.1%)    | 21<br>(6.4%)   | 42<br>(6.2%)   | 61<br>(12.9%)               | 57<br>(11.9%)  | 118<br>(12.4%) | 21<br>(7.4%)    | 15<br>(5.1%)   | 36<br>(6.2%)   |
| F20              | Avocado                            | 33<br>(4.6%)                | 24<br>(3.1%)   | 57<br>(3.8%)    | 8<br>(2.3%)     | 11<br>(3.3%)   | 19<br>(2.8%)   | 12<br>(2.5%)                | 10<br>(2.1%)   | 22<br>(2.3%)   | 5<br>(1.8%)     | 3<br>(1.0%)    | 8<br>(1.4%)    |
| F21              | Onion, spring<br>onion, leek       | 98<br>(13.7%)               | 124<br>(16.0%) | 222<br>(14.9%)  | 5<br>(1.4%)     | 12<br>(3.6%)   | 17<br>(2.5%)   | 61<br>(12.9%)               | 60<br>(12.5%)  | 121<br>(12.8%) | 7<br>(2.5%)     | 5<br>(1.7%)    | 12<br>(2.1%)   |
| F22              | Soybeans, tofu                     | 5<br>(0.7%)                 | 5<br>(0.6%)    | 10<br>(0.7%)    | 1<br>(0.3%)     | 3<br>(0.9%)    | 4<br>(0.6%)    | 1<br>(0.2%)                 | 1<br>(0.2%)    | 2<br>(0.2%)    | 0<br>(0%)       | 1<br>(0.3%)    | 1<br>(0.2%)    |
| F23              | Baked beans                        | 30<br>(4.2%)                | 30<br>(3.9%)   | 60<br>(4.0%)    | 6<br>(1.7%)     | 7<br>(2.1%)    | 13<br>(1.9%)   | 14<br>(3%)                  | 14<br>(2.9%)   | 28<br>(2.9%)   | 2<br>(0.7%)     | 6<br>(2.0%)    | 8<br>(1.4%)    |
| F24              | Other beans,<br>lentils            | 18<br>(2.5%)                | 10<br>(1.3%)   | 28<br>(1.9%)    | 4<br>(1.2%)     | 4<br>(1.2%)    | 8<br>(1.2%)    | 7<br>(1.5%)                 | 9<br>(1.9%)    | 16<br>(1.7%)   | 2<br>(0.7%)     | 1<br>(0.3%)    | 3<br>(0.5%)    |
| F25              | Canned fruit                       | 49<br>(6.9%)                | 52<br>(6.7%)   | 101<br>(6.8%)   | 15<br>(4.3%)    | 14<br>(4.2%)   | 29<br>(4.3%)   | 25<br>(5.3%)                | 28<br>(5.8%)   | 53<br>(5.5%)   | 9<br>(3.2%)     | 11<br>(3.7%)   | 20<br>(3.5%)   |
| F26              | Fruit salad                        | 22<br>(3.1%)                | 34<br>(4.4%)   | 56<br>(3.8%)    | 17<br>(4.9%)    | 12<br>(3.6%)   | 29<br>(4.3%)   | 9<br>(1.9%)                 | 6<br>(1.2%)    | 15<br>(1.6%)   | 4<br>(1.4%)     | 8<br>(2.7%)    | 12<br>(2.1%)   |
| F27              | Dried fruit                        | 99<br>(13.8%)               | 133<br>(17.1%) | 232<br>(15.6%)  | 32<br>(9.3%)    | 40<br>(12.1%)  | 72<br>(10.7%)  | 28<br>(5.9%)                | 32<br>(6.7%)   | 60<br>(6.3%)   | 11<br>(3.9%)    | 15<br>(5.1%)   | 26<br>(4.5%)   |
| F28              | Apple or pear                      | 347<br>(48.5%)              | 398<br>(51.3%) | 745<br>(50.0%)  | 144<br>(41.7%)  | 132<br>(40.0%) | 276<br>(40.9%) | 184<br>(38.8%)              | 179<br>(37.2%) | 363<br>(38.0%) | 124<br>(43.8%)  | 132<br>(44.7%) | 256<br>(44.3%) |
| F29              | Orange,<br>mandarin,<br>grapefruit | 159<br>(22.2%)              | 171<br>(22.0%) | 330<br>(22.1%)  | 49<br>(14.2%)   | 49<br>(14.8%)  | 98<br>(14.5%)  | 95<br>(20.0%)               | 83<br>(17.3%)  | 178<br>(18.6%) | 65<br>(23.0%)   | 39<br>(13.2%)  | 104<br>(18.0%) |
| F30              | Banana                             | 280<br>(39.2%)              | 253<br>(32.6%) | 533<br>(35.7%)  | 88<br>(25.5%)   | 109<br>(33.0%) | 197<br>(29.2%) | 108<br>(22.8%)              | 118<br>(24.5%) | 226<br>(23.7%) | 53<br>(18.7%)   | 65<br>(22.0%)  | 118<br>(20.4%) |
| Seasonal Fruits: |                                    |                             |                |                 |                 |                |                |                             |                |                |                 |                |                |

**Table S6a: Percentage of Australian children aged 2–4 years and 5–8 years consuming selected ACAES food categories, in the 2007 ANCNPAS and the 2011–12 NNPAS**

|                |                                         | 2 – 4-year-old participants |                       |                         |                         |                       |                        | 5 – 8-year-old participants |                       |                        |                         |                       |                        |
|----------------|-----------------------------------------|-----------------------------|-----------------------|-------------------------|-------------------------|-----------------------|------------------------|-----------------------------|-----------------------|------------------------|-------------------------|-----------------------|------------------------|
| ACAES FFQ Item |                                         | ANCNPAS (2007)              |                       |                         | NNPAS (2011–12)         |                       |                        | ANCNPAS (2007)              |                       |                        | NNPAS (2011–12)         |                       |                        |
|                |                                         | Female<br><i>n</i> =715     | Male<br><i>n</i> =776 | Total<br><i>n</i> =1491 | Female<br><i>n</i> =345 | Male<br><i>n</i> =330 | Total<br><i>n</i> =675 | Female<br><i>n</i> =474     | Male<br><i>n</i> =481 | Total<br><i>n</i> =955 | Female<br><i>n</i> =283 | Male<br><i>n</i> =295 | Total<br><i>n</i> =578 |
| SF1            | Peach,<br>nectarine, plum<br>or apricot | 9<br>(1.3%)                 | 10<br>(1.3%)          | 19<br>(1.3%)            | 15<br>(4.3%)            | 16<br>(4.8%)          | 31<br>(4.6%)           | 16<br>(3.4%)                | 10<br>(2.1%)          | 26<br>(2.7%)           | 13<br>(4.6%)            | 11<br>(3.7%)          | 24<br>(4.2%)           |
| SF2            | Mango or paw-<br>paw                    | 5<br>(0.7%)                 | 2<br>(0.3%)           | 7<br>(0.5%)             | 8<br>(2.3%)             | 6<br>(1.8%)           | 14<br>(2.1%)           | 2<br>(0.4%)                 | 0<br>(0%)             | 2<br>(0.2%)            | 3<br>(1.1%)             | 6<br>(2.0%)           | 9<br>(1.6%)            |
| SF3            | Pineapple                               | 13<br>(1.8%)                | 6<br>(0.8%)           | 19<br>(1.3%)            | 3<br>(0.9%)             | 4<br>(1.2%)           | 7<br>(1.0%)            | 2<br>(0.4%)                 | 5<br>(1.0%)           | 7<br>(0.7%)            | 2<br>(0.7%)             | 3<br>(1.0%)           | 5<br>(0.9%)            |
| SF4            | Grapes,<br>strawberries,<br>blueberries | 153<br>(21.4%)              | 144<br>(18.6%)        | 297<br>(19.9%)          | 88<br>(25.5%)           | 88<br>(26.7%)         | 176<br>(26.1%)         | 61<br>(12.9%)               | 49<br>(10.2%)         | 110<br>(11.5%)         | 55<br>(19.4%)           | 59<br>(20.0%)         | 114<br>(19.7%)         |
| SF5            | Melon                                   | 64<br>(9.0%)                | 92<br>(11.9%)         | 156<br>(10.5%)          | 30<br>(8.7%)            | 33<br>(10.0%)         | 63<br>(9.3%)           | 45<br>(9.5%)                | 40<br>(8.3%)          | 85<br>(8.9%)           | 26<br>(9.2%)            | 24<br>(8.1%)          | 50<br>(8.7%)           |

**Table S6b: Percentage of Australian children aged 9-12 years and 13-16 years consuming selected ACAES food categories, in the 2007 ANCNPAS and the 2011-12 NNPAS**

|                     |                                                                       | 9 – 12 year old participants |                       |                          |                         |                       |                        | 13 – 16 year old participants |                       |                           |                         |                       |                        |
|---------------------|-----------------------------------------------------------------------|------------------------------|-----------------------|--------------------------|-------------------------|-----------------------|------------------------|-------------------------------|-----------------------|---------------------------|-------------------------|-----------------------|------------------------|
| ACAES FFQ Item      |                                                                       | ANCNPAS (2007)               |                       |                          | NNPAS (2011–12)         |                       |                        | ANCNPAS (2007)                |                       |                           | NNPAS (2011–12)         |                       |                        |
|                     |                                                                       | Female<br><i>n</i> =509      | Male<br><i>n</i> =457 | Persons<br><i>n</i> =966 | Female<br><i>n</i> =308 | Male<br><i>n</i> =314 | Total<br><i>n</i> =622 | Female<br><i>n</i> =694       | Male<br><i>n</i> =695 | Persons<br><i>n</i> =1389 | Female<br><i>n</i> =336 | Male<br><i>n</i> =337 | Total<br><i>n</i> =673 |
| <b>Drinks</b>       |                                                                       |                              |                       |                          |                         |                       |                        |                               |                       |                           |                         |                       |                        |
| D1                  | DIET soft drink                                                       | 28<br>(5.5%)                 | 24<br>(5.3%)          | 52<br>(5.4%)             | 17<br>(5.5%)            | 20<br>(6.4%)          | 37<br>(5.9%)           | 53<br>(7.6%)                  | 69<br>(9.9%)          | 122<br>(8.8%)             | 22<br>(6.5%)            | 22<br>(6.5%)          | 44<br>(6.5%)           |
| D2                  | Soft drink (NOT DIET) including flavoured mineral water               | 145<br>(28.5%)               | 148<br>(32.4%)        | 293<br>(30.3%)           | 74<br>(24.0%)           | 86<br>(27.4%)         | 160<br>(25.7%)         | 217<br>(31.3%)                | 280<br>(40.3%)        | 497<br>(35.8%)            | 111<br>(33.0%)          | 141<br>(41.8%)        | 252<br>(37.4%)         |
| D3                  | Water - including bottled water, unflavoured mineral water, tap water | 488<br>(95.9%)               | 439<br>(96.1%)        | 927<br>(96.0%)           | 285<br>(92.5%)          | 290<br>(92.4%)        | 575<br>(92.4%)         | 630<br>(90.8%)                | 623<br>(89.6%)        | 1253<br>(90.2%)           | 300<br>(89.3%)          | 298<br>(88.4%)        | 598<br>(88.9%)         |
| D4                  | Fruit juice-based drinks                                              | 230<br>(45.2%)               | 203<br>(44.4%)        | 433<br>(44.8%)           | 124<br>(40.3%)          | 119<br>(37.9%)        | 243<br>(39.1%)         | 317<br>(45.7%)                | 289<br>(41.6%)        | 606<br>(43.6%)            | 119<br>(35.4%)          | 120<br>(35.6%)        | 239<br>(35.5%)         |
| D5                  | Cordial or 'make up'                                                  | 105<br>(20.6%)               | 104<br>(22.8%)        | 209<br>(21.6%)           | 31<br>(10.1%)           | 44<br>(14.0%)         | 75<br>(12.1%)          | 124<br>(17.9%)                | 154<br>(22.2%)        | 278<br>(20.0%)            | 30<br>(8.9%)            | 42<br>(12.5%)         | 72<br>(10.7%)          |
| D6                  | Tea or Coffee                                                         | 41<br>(8.1%)                 | 27<br>(5.9%)          | 68<br>(7.0%)             | 21<br>(6.8%)            | 16<br>(5.1%)          | 37<br>(5.9%)           | 133<br>(19.2%)                | 118<br>(17%)          | 251<br>(18.1%)            | 75<br>(22.3%)           | 46<br>(13.6%)         | 121<br>(18.0%)         |
| D7                  | Beer                                                                  | 0<br>(0%)                    | 0<br>(0%)             | 0<br>(0%)                | 0<br>(0%)               | 0<br>(0%)             | 0<br>(0%)              | 0<br>(0%)                     | 1<br>(0.1%)           | 1<br>(0.1%)               | 0<br>(0%)               | 2<br>(0.6%)           | 2<br>(0.3%)            |
| D8                  | Wine or wine coolers                                                  | 4<br>(0.8%)                  | 2<br>(0.4%)           | 6<br>(0.6%)              | 0<br>(0%)               | 0<br>(0%)             | 0<br>(0%)              | 7<br>(1%)                     | 7<br>(1%)             | 14<br>(1%)                | 1<br>(0.3%)             | 2<br>(0.6%)           | 3<br>(0.4%)            |
| D9                  | Spirits                                                               | 1<br>(0.2%)                  | 0<br>(0%)             | 1<br>(0.1%)              | 0<br>(0%)               | 0<br>(0%)             | 0<br>(0%)              | 7<br>(1%)                     | 2<br>(0.3%)           | 9<br>(0.6%)               | 0<br>(0%)               | 1<br>(0.3%)           | 1<br>(0.1%)            |
| <b>Dairy foods:</b> |                                                                       |                              |                       |                          |                         |                       |                        |                               |                       |                           |                         |                       |                        |
| DF1 + DF3           | Soy Milk                                                              | 6<br>(1.2%)                  | 7<br>(1.5%)           | 13<br>(1.3%)             | 2<br>(0.6%)             | 1<br>(0.3%)           | 3<br>(0.5%)            | 12<br>(1.7%)                  | 7<br>(1.0%)           | 19<br>(1.4%)              | 3<br>(0.9%)             | 3<br>(0.9%)           | 6<br>(0.9%)            |
| DF1 + DF3           | Whole Milk                                                            | 209<br>(41.2%)               | 221<br>(48.4%)        | 430<br>(44.5%)           | 117<br>(33.9%)          | 145<br>(46.2%)        | 262<br>(42.1%)         | 241<br>(34.7%)                | 337<br>(48.5%)        | 578<br>(41.6%)            | 103<br>(30.7%)          | 146<br>(43.3%)        | 249<br>(37.0%)         |

**Table S6b: Percentage of Australian children aged 9-12 years and 13-16 years consuming selected ACAES food categories, in the 2007 ANCNPAS and the 2011-12 NNPAS**

|                           |                                                             | 9 – 12 year old participants |                |                  |                 |               |                | 13 – 16 year old participants |                |                   |                 |               |                |
|---------------------------|-------------------------------------------------------------|------------------------------|----------------|------------------|-----------------|---------------|----------------|-------------------------------|----------------|-------------------|-----------------|---------------|----------------|
| ACAES FFQ Item            |                                                             | ANCNPAS (2007)               |                |                  | NNPAS (2011–12) |               |                | ANCNPAS (2007)                |                |                   | NNPAS (2011–12) |               |                |
|                           |                                                             | Female<br>n=509              | Male<br>n=457  | Persons<br>n=966 | Female<br>n=308 | Male<br>n=314 | Total<br>n=622 | Female<br>n=694               | Male<br>n=695  | Persons<br>n=1389 | Female<br>n=336 | Male<br>n=337 | Total<br>n=673 |
| DF1 +<br>DF3              | Reduced Fat Milk                                            | 120<br>(23.6%)               | 117<br>(48.4%) | 237<br>(24.5%)   | 57<br>(18.5%)   | 60<br>(19.1%) | 117<br>(18.8%) | 133<br>(19.2%)                | 145<br>(20.9%) | 278<br>(20.0%)    | 66<br>(19.6%)   | 53<br>(15.7%) | 119<br>(17.7%) |
| DF1 +<br>DF3              | Skim Milk                                                   | 32<br>(6.3%)                 | 17<br>(3.7%)   | 49<br>(5.1%)     | 17<br>(5.5%)    | 9<br>(2.9%)   | 26<br>(4.2%)   | 36<br>(5.2%)                  | 23<br>(3.3%)   | 59<br>(4.2%)      | 23<br>(6.8%)    | 9<br>(2.7%)   | 32<br>(4.8%)   |
| DF2                       | Flavoured milk                                              | 83<br>(16.3%)                | 75<br>(16.4%)  | 158<br>(16.4%)   | 30<br>(9.7%)    | 35<br>(11.1%) | 65<br>(10.5%)  | 126<br>(18.2%)                | 118<br>(17.0%) | 254<br>(18.3%)    | 44<br>(13.1%)   | 46<br>(13.6%) | 90<br>(13.4%)  |
| DF4                       | Cream or sour cream                                         | 26<br>(5.1%)                 | 28<br>(6.1%)   | 54<br>(5.6%)     | 7<br>(2.3%)     | 4<br>(1.3%)   | 11<br>(1.8%)   | 46<br>(6.6%)                  | 32<br>(4.6%)   | 78<br>(5.6%)      | 7<br>(2.1%)     | 12<br>(3.7%)  | 19<br>(2.8%)   |
| DF5                       | Ice cream                                                   | 116<br>(22.8%)               | 97<br>(21.2%)  | 213<br>(22.0%)   | 56<br>(18.2%)   | 51<br>(16.2%) | 107<br>(17.2%) | 100<br>(14.4%)                | 127<br>(18.3%) | 227<br>(16.3%)    | 47<br>(14.0%)   | 54<br>(16.0%) | 101<br>(15.0%) |
| DF6                       | Frozen yoghurt                                              | 4<br>(0.8%)                  | 5<br>(1.1%)    | 9<br>(0.9%)      | 4<br>(1.3%)     | 4<br>(1.3%)   | 8<br>(1.3%)    | 6<br>(0.9%)                   | 4<br>(0.6%)    | 10<br>(0.7%)      | 1<br>(0.3%)     | 2<br>(0.6%)   | 3<br>(0.4%)    |
| DF7                       | Yoghurt (not frozen) plain or flavoured                     | 73<br>(14.3%)                | 65<br>(14.2%)  | 138<br>(14.3%)   | 45<br>(14.6%)   | 39<br>(12.4%) | 84<br>(13.5%)  | 94<br>(13.5%)                 | 74<br>(10.6%)  | 168<br>(12.1%)    | 39<br>(11.6%)   | 28<br>(8.3%)  | 67<br>(10.0%)  |
| DF8                       | Cottage cheese or ricotta                                   | 2<br>(0.4%)                  | 1<br>(0.2%)    | 3<br>(0.3%)      | 1<br>(0.3%)     | 3<br>(1.0%)   | 4<br>(0.6%)    | 3<br>(0.4%)                   | 1<br>(0.1%)    | 4<br>(0.3%)       | 2<br>(0.6%)     | 0<br>(0%)     | 2<br>(0.3%)    |
| DF9                       | Cheese including cheese on sandwiches, biscuits or on toast | 208<br>(40.9%)               | 166<br>(36.3%) | 374<br>(38.7%)   | 66<br>(21.4%)   | 77<br>(24.5%) | 143<br>(23.0%) | 256<br>(36.9%)                | 245<br>(35.3%) | 501<br>(36.1%)    | 48<br>(14.3%)   | 79<br>(23.4%) | 127<br>(18.9%) |
| DF10                      | Cheese spread, cream cheese                                 | 15<br>(2.9%)                 | 10<br>(2.2%)   | 25<br>(2.6%)     | 6<br>(1.9%)     | 7<br>(2.2%)   | 13<br>(2.1%)   | 16<br>(2.3%)                  | 20<br>(2.9%)   | 36<br>(2.6%)      | 11<br>(3.3%)    | 4<br>(1.2%)   | 15<br>(2.2%)   |
| <b>Breads and Cereal:</b> |                                                             |                              |                |                  |                 |               |                |                               |                |                   |                 |               |                |
| B1                        | Muesli                                                      | 11<br>(2.2%)                 | 3<br>(0.7%)    | 14<br>(1.4%)     | 3<br>(0.9%)     | 1<br>(0.3%)   | 4<br>(0.6%)    | 8<br>(1.2%)                   | 9<br>(1.3%)    | 17<br>(1.2%)      | 8<br>(2.4%)     | 4<br>(1.2%)   | 12<br>(1.8%)   |
| B2                        | Cooked porridge                                             | 23<br>(4.5%)                 | 26<br>(5.7%)   | 49<br>(5.1%)     | 21<br>(6.8%)    | 5<br>(1.6%)   | 26<br>(4.2%)   | 30<br>(4.3%)                  | 20<br>(2.9%)   | 50<br>(3.6%)      | 14<br>(4.2%)    | 12<br>(3.6%)  | 26<br>(3.9%)   |

**Table S6b: Percentage of Australian children aged 9-12 years and 13-16 years consuming selected ACAES food categories, in the 2007 ANCNPAS and the 2011-12 NNPAS**

|                           |                                                             | 9 – 12 year old participants |                |                  |                 |                |                | 13 – 16 year old participants |                |                   |                 |                |                |
|---------------------------|-------------------------------------------------------------|------------------------------|----------------|------------------|-----------------|----------------|----------------|-------------------------------|----------------|-------------------|-----------------|----------------|----------------|
| ACAES FFQ Item            |                                                             | ANCNPAS (2007)               |                |                  | NNPAS (2011–12) |                |                | ANCNPAS (2007)                |                |                   | NNPAS (2011–12) |                |                |
|                           |                                                             | Female<br>n=509              | Male<br>n=457  | Persons<br>n=966 | Female<br>n=308 | Male<br>n=314  | Total<br>n=622 | Female<br>n=694               | Male<br>n=695  | Persons<br>n=1389 | Female<br>n=336 | Male<br>n=337  | Total<br>n=673 |
| B3                        | Breakfast cereal                                            | 191<br>(37.5%)               | 247<br>(54.0%) | 438<br>(45.3%)   | 109<br>(35.4%)  | 139<br>(44.3%) | 248<br>(39.9%) | 205<br>(29.5%)                | 357<br>(51.4%) | 562<br>(40.5%)    | 89<br>(26.5%)   | 141<br>(41.8%) | 230<br>(34.2%) |
| B5                        | Bread, pita bread, roll – White                             | 284<br>(55.8%)               | 266<br>(58.2%) | 550<br>(57.0%)   | 167<br>(54.2%)  | 178<br>(56.7%) | 345<br>(55.5%) | 342<br>(49.3%)                | 391<br>(56.3%) | 733<br>(52.8%)    | 141<br>(42.0%)  | 185<br>(54.9%) | 326<br>(48.5%) |
| B5                        | Bread, pita bread, roll – Mixed Grain                       | 51<br>(10.0%)                | 32<br>(7.0%)   | 83<br>(8.6%)     | 21<br>(6.8%)    | 21<br>(6.7%)   | 42<br>(6.8%)   | 80<br>(11.5%)                 | 61<br>(8.8%)   | 141<br>(10.2%)    | 31<br>(9.2%)    | 20<br>(5.9%)   | 51<br>(7.6%)   |
| B5                        | Bread, pita bread, roll - Wholemeal                         | 73<br>(14.3%)                | 72<br>(15.8%)  | 145<br>(15.0%)   | 36<br>(10.4%)   | 42<br>(13.4%)  | 78<br>(12.5%)  | 106<br>(15.3%)                | 91<br>(13.1%)  | 197<br>(14.2%)    | 49<br>(14.6%)   | 31<br>(9.2%)   | 80<br>(11.9%)  |
| B6                        | English muffin, bagel or crumpet                            | 25<br>(4.9%)                 | 21<br>(4.6%)   | 46<br>(4.8%)     | 8<br>(2.6%)     | 11<br>(3.5%)   | 19<br>(3.1%)   | 35<br>(5.0%)                  | 42<br>(6.0%)   | 77<br>(5.5%)      | 14<br>(4.2%)    | 7<br>(2.1%)    | 21<br>(3.1%)   |
| B7                        | Rice                                                        | 80<br>(15.7%)                | 65<br>(14.2%)  | 145<br>(15.0%)   | 60<br>(19.5%)   | 56<br>(17.8%)  | 116<br>(18.6%) | 108<br>(15.6%)                | 121<br>(17.4%) | 229<br>(16.5%)    | 50<br>(14.9%)   | 55<br>(16.3%)  | 105<br>(15.6%) |
| B8                        | Other grains eg. cous cous, burghul                         | 3<br>(0.6%)                  | 2<br>(0.4%)    | 5<br>(0.5%)      | 5<br>(1.6%)     | 4<br>(1.3%)    | 9<br>(1.4%)    | 4<br>(0.6%)                   | 3<br>(0.4%)    | 7<br>(0.5%)       | 4<br>(1.2%)     | 1<br>(0.3%)    | 5<br>(0.7%)    |
| B9                        | Noodles                                                     | 11<br>(2.2%)                 | 9<br>(2.0%)    | 20<br>(2.1%)     | 10<br>(3.2%)    | 7<br>(2.2%)    | 17<br>(2.7%)   | 14<br>(2.0%)                  | 11<br>(1.6%)   | 25<br>(1.8%)      | 8<br>(2.4%)     | 8<br>(2.4%)    | 16<br>(2.4%)   |
| B10                       | Pasta                                                       | 106<br>(20.8%)               | 98<br>(21.4%)  | 204<br>(21.1%)   | 34<br>(11.0%)   | 42<br>(13.4%)  | 76<br>(12.2%)  | 142<br>(20.5%)                | 151<br>(21.7%) | 293<br>(21.1%)    | 38<br>(11.3%)   | 40<br>(11.9%)  | 78<br>(11.6%)  |
| <b>Sweets and Snacks:</b> |                                                             |                              |                |                  |                 |                |                |                               |                |                   |                 |                |                |
| S1                        | Cakes, sweet muffins, scones, pikelets, pancakes, hot cakes | 145<br>(28.5%)               | 113<br>(24.7%) | 258<br>(26.7%)   | 71<br>(23.1%)   | 69<br>(22.0%)  | 140<br>(22.5%) | 180<br>(25.9%)                | 167<br>(24.0%) | 347<br>(25.0%)    | 74<br>(22.0%)   | 60<br>(17.8%)  | 134<br>(19.9%) |
| S2                        | Sweet pies or sweet pastries                                | 46<br>(9.0%)                 | 39<br>(8.5%)   | 85<br>(8.8%)     | 21<br>(6.8%)    | 23<br>(7.3%)   | 44<br>(7.1%)   | 42<br>(6.1%)                  | 51<br>(7.3%)   | 93<br>(6.7%)      | 23<br>(6.8%)    | 30<br>(8.9%)   | 53<br>(7.9%)   |

**Table S6b: Percentage of Australian children aged 9-12 years and 13-16 years consuming selected ACAES food categories, in the 2007 ANCNPAS and the 2011-12 NNPAS**

|                    |                                               | 9 – 12 year old participants |                |                  |                 |               |                | 13 – 16 year old participants |                |                   |                 |               |                |
|--------------------|-----------------------------------------------|------------------------------|----------------|------------------|-----------------|---------------|----------------|-------------------------------|----------------|-------------------|-----------------|---------------|----------------|
| ACAES FFQ Item     |                                               | ANCNPAS (2007)               |                |                  | NNPAS (2011–12) |               |                | ANCNPAS (2007)                |                |                   | NNPAS (2011–12) |               |                |
|                    |                                               | Female<br>n=509              | Male<br>n=457  | Persons<br>n=966 | Female<br>n=308 | Male<br>n=314 | Total<br>n=622 | Female<br>n=694               | Male<br>n=695  | Persons<br>n=1389 | Female<br>n=336 | Male<br>n=337 | Total<br>n=673 |
| S3                 | Other puddings or desserts (not ice cream)    | 43<br>(8.4%)                 | 32<br>(7.0%)   | 75<br>(7.8%)     | 24<br>(7.8%)    | 15<br>(4.8%)  | 39<br>(6.3%)   | 43<br>(6.2%)                  | 35<br>(5.0%)   | 78<br>(5.6%)      | 18<br>(5.4%)    | 18<br>(5.3%)  | 36<br>(5.3%)   |
| S4                 | Plain sweet biscuits                          | 81<br>(15.9%)                | 69<br>(15.1%)  | 150<br>(15.5%)   | 61<br>(19.8%)   | 61<br>(19.4%) | 122<br>(19.6%) | 92<br>(13.3%)                 | 92<br>(13.2%)  | 184<br>(13.2%)    | 47<br>(14.0%)   | 44<br>(13.1%) | 91<br>(13.5%)  |
| S5                 | Cream or chocolate biscuits                   | 64<br>(12.6%)                | 75<br>(16.4%)  | 139<br>(14.4%)   | 36<br>(11.7%)   | 38<br>(12.1%) | 74<br>(11.9%)  | 78<br>(11.2%)                 | 100<br>(14.4%) | 178<br>(12.8%)    | 32<br>(9.5%)    | 33<br>(9.8%)  | 65<br>(9.7%)   |
| S6                 | Dry or savoury biscuits, crispbread, crackers | 134<br>(26.3%)               | 106<br>(23.2%) | 240<br>(24.8%)   | 68<br>(22.1%)   | 71<br>(22.6%) | 139<br>(22.3%) | 124<br>(17.9%)                | 109<br>(15.7%) | 233<br>(16.8%)    | 69<br>(20.5%)   | 50<br>(14.8%) | 119<br>(17.7%) |
| S7                 | Savoury combination snacks                    | 15<br>(2.9%)                 | 12<br>(2.6%)   | 27<br>(2.8%)     | 6<br>(1.9%)     | 10<br>(3.2%)  | 16<br>(2.6%)   | 11<br>(1.6%)                  | 13<br>(1.9%)   | 24<br>(1.7%)      | 8<br>(2.4%)     | 3<br>(0.9%)   | 11<br>(1.6%)   |
| S8                 | Sweet combination snacks                      | -                            | -              | -                | -               | -             | -              | -                             | -              | -                 | -               | -             | -              |
| S9                 | Snack noodles                                 | 33<br>(6.5%)                 | 38<br>(8.3%)   | 71<br>(7.3%)     | 17<br>(5.5%)    | 17<br>(5.4%)  | 34<br>(5.5%)   | 52<br>(7.5%)                  | 48<br>(6.9%)   | 100<br>(7.2%)     | 16<br>(4.8%)    | 23<br>(6.8%)  | 39<br>(5.8%)   |
| S10                | Fruit bars                                    | 0<br>(0%)                    | 0<br>(0%)      | 0<br>(0%)        | 4<br>(1.3%)     | 2<br>(0.6%)   | 6<br>(1.0%)    | 0<br>(0%)                     | 0<br>(0%)      | 0<br>(0%)         | 4<br>(1.2%)     | 1<br>(0.3%)   | 5<br>(0.7%)    |
| S11                | Snack bars                                    | 19<br>(3.7%)                 | 18<br>(3.9%)   | 37<br>(3.8%)     | 1<br>(0.3%)     | 4<br>(1.3%)   | 5<br>(0.8%)    | 26<br>(3.7%)                  | 32<br>(4.6%)   | 58<br>(4.2%)      | 0<br>(0%)       | 3<br>(0.9%)   | 3<br>(0.4%)    |
| S12                | Muesli bars                                   | 63<br>(12.4%)                | 60<br>(13.1%)  | 123<br>(12.7%)   | 47<br>(15.3%)   | 53<br>(16.9%) | 100<br>(16.1%) | 97<br>(14.0%)                 | 114<br>(16.4%) | 211<br>(15.2%)    | 48<br>(14.3%)   | 59<br>(17.5%) | 107<br>(15.9%) |
| <b>Main Meals:</b> |                                               |                              |                |                  |                 |               |                |                               |                |                   |                 |               |                |
| M1                 | Mince dish                                    | 63<br>(12.4%)                | 69<br>(15.1%)  | 132<br>(13.7%)   | 39<br>(12.7%)   | 41<br>(13.1%) | 80<br>(12.9%)  | 84<br>(12.1%)                 | 99<br>(14.2%)  | 183<br>(13.2%)    | 49<br>(14.6%)   | 44<br>(13.1%) | 93<br>(13.8%)  |

**Table S6b: Percentage of Australian children aged 9-12 years and 13-16 years consuming selected ACAES food categories, in the 2007 ANCNPAS and the 2011-12 NNPAS**

|                            |                                                             | 9 – 12 year old participants |               |                  |                 |               |                | 13 – 16 year old participants |                |                   |                 |               |                |
|----------------------------|-------------------------------------------------------------|------------------------------|---------------|------------------|-----------------|---------------|----------------|-------------------------------|----------------|-------------------|-----------------|---------------|----------------|
| ACAES FFQ Item             |                                                             | ANCNPAS (2007)               |               |                  | NNPAS (2011–12) |               |                | ANCNPAS (2007)                |                |                   | NNPAS (2011–12) |               |                |
|                            |                                                             | Female<br>n=509              | Male<br>n=457 | Persons<br>n=966 | Female<br>n=308 | Male<br>n=314 | Total<br>n=622 | Female<br>n=694               | Male<br>n=695  | Persons<br>n=1389 | Female<br>n=336 | Male<br>n=337 | Total<br>n=673 |
| M2-3, M5,<br>M11–12,<br>14 | Mixed meat dish                                             | 12<br>(2.4%)                 | 8<br>(1.8%)   | 20<br>(2.0%)     | 18<br>(5.8%)    | 21<br>(6.7%)  | 39<br>(6.3%)   | 22<br>(3.2%)                  | 18<br>(2.6%)   | 40<br>(2.9%)      | 20<br>(6.0%)    | 19<br>(5.6%)  | 39<br>(5.8%)   |
| M4                         | Plain meat (beef or lamb)<br>WITHOUT<br>vegetables or salad | 84<br>(16.5%)                | 91<br>(19.9%) | 175<br>(18.1%)   | 32<br>(10.4%)   | 33<br>(10.5%) | 65<br>(10.5%)  | 129<br>(18.6%)                | 148<br>(21.3%) | 277<br>(19.9%)    | 51<br>(15.2%)   | 52<br>(15.4%) | 103<br>(15.3%) |
| M6-7,<br>M10               | Mixed chicken dish                                          | 30<br>(5.9%)                 | 20<br>(4.4%)  | 50<br>(5.2%)     | 23<br>(7.5%)    | 23<br>(7.3%)  | 46<br>(7.4%)   | 39<br>(5.6%)                  | 58<br>(8.3%)   | 97<br>(6.9%)      | 14<br>(4.2%)    | 18<br>(5.3%)  | 32<br>(4.8%)   |
| M8                         | Chicken crumbed                                             | 56<br>(11.0%)                | 41<br>(9.0%)  | 97<br>(10.0%)    | 34<br>(11.0%)   | 31<br>(10.0%) | 65<br>(10.5%)  | 59<br>(8.5%)                  | 69<br>(9.9%)   | 128<br>(9.2%)     | 29<br>(8.6%)    | 36<br>(10.7%) | 65<br>(9.7%)   |
| M9                         | Plain chicken<br>WITHOUT<br>vegetables                      | 85<br>(16.7%)                | 89<br>(19.5%) | 174<br>(18.0%)   | 34<br>(11.0%)   | 19<br>(6.1%)  | 53<br>(8.5%)   | 119<br>(17.1%)                | 137<br>(19.7%) | 256<br>(18.4%)    | 43<br>(12.8%)   | 39<br>(11.6%) | 82<br>(12.2%)  |
| M13                        | Plain pork<br>WITHOUT<br>vegetables                         | 16<br>(3.1%)                 | 18<br>(3.9%)  | 34<br>(3.5%)     | 10<br>(3.2%)    | 11<br>(3.5%)  | 21<br>(3.4%)   | 29<br>(4.2%)                  | 21<br>(3.0%)   | 50<br>(3.6%)      | 16<br>(4.8%)    | 8<br>(2.4%)   | 24<br>(3.6%)   |
| M15                        | Liver – beef, calf, chicken                                 | 3<br>(0.6%)                  | 0<br>(0%)     | 3<br>(0.3%)      | 0<br>(0%)       | 0<br>(0%)     | 0<br>(0%)      | 1<br>(0.1%)                   | 1<br>(0.1%)    | 2<br>(0.1%)       | 1<br>(0.3%)     | 0<br>(0%)     | 1<br>(0.1%)    |
| M16-17                     | Fish                                                        | 28<br>(5.5%)                 | 27<br>(5.9%)  | 55<br>(5.7%)     | 21<br>(6.8%)    | 15<br>(4.8%)  | 36<br>(5.8%)   | 31<br>(4.5%)                  | 13<br>(1.9%)   | 44<br>(3.2%)      | 9<br>(2.7%)     | 18<br>(5.3%)  | 27<br>(4.0%)   |
| M18                        | Canned tuna, salmon, sardines including patties             | 25<br>(4.9%)                 | 16<br>(3.5%)  | 41<br>(4.2%)     | 8<br>(2.6%)     | 12<br>(3.8%)  | 20<br>(3.2%)   | 26<br>(3.7%)                  | 20<br>(2.9%)   | 46<br>(3.3%)      | 9<br>(2.7%)     | 9<br>(2.7%)   | 18<br>(2.7%)   |
| M19                        | Other seafood                                               | 9<br>(1.8%)                  | 9<br>(2.0%)   | 18<br>(1.9%)     | 3<br>(1.0%)     | 4<br>(1.3%)   | 7<br>(1.1%)    | 12<br>(1.7%)                  | 9<br>(1.3%)    | 21<br>(1.5%)      | 4<br>(1.2%)     | 5<br>(1.5%)   | 9<br>(1.3%)    |
| M20-21                     | Creamy or Clear soup                                        | 44<br>(8.6%)                 | 29<br>(6.3%)  | 73<br>(7.6%)     | 21<br>(6.8%)    | 15<br>(4.8%)  | 36<br>(5.8%)   | 71<br>(10.2%)                 | 55<br>(7.9%)   | 126<br>(9.1%)     | 15<br>(4.5%)    | 13<br>(3.9%)  | 28<br>(4.2%)   |
| M22                        | Tacos, burritos, enchiladas                                 | 15<br>(2.9%)                 | 13<br>(2.8%)  | 28<br>(2.9%)     | 8<br>(2.6%)     | 6<br>(1.9%)   | 14<br>(2.3%)   | 8<br>(1.2%)                   | 8<br>(1.2%)    | 16<br>(1.2%)      | 3<br>(0.9%)     | 9<br>(2.8%)   | 12<br>(1.8%)   |

**Table S6b: Percentage of Australian children aged 9-12 years and 13-16 years consuming selected ACAES food categories, in the 2007 ANCNPAS and the 2011-12 NNPAS**

|                     |                                 | 9 – 12 year old participants |                |                  |                 |               |                | 13 – 16 year old participants |                |                   |                 |               |                |
|---------------------|---------------------------------|------------------------------|----------------|------------------|-----------------|---------------|----------------|-------------------------------|----------------|-------------------|-----------------|---------------|----------------|
| ACAES FFQ Item      |                                 | ANCNPAS (2007)               |                |                  | NNPAS (2011–12) |               |                | ANCNPAS (2007)                |                |                   | NNPAS (2011–12) |               |                |
|                     |                                 | Female<br>n=509              | Male<br>n=457  | Persons<br>n=966 | Female<br>n=308 | Male<br>n=314 | Total<br>n=622 | Female<br>n=694               | Male<br>n=695  | Persons<br>n=1389 | Female<br>n=336 | Male<br>n=337 | Total<br>n=673 |
| M23                 | Sausages, frankfurts, Pluto Pup | 62<br>(12.2%)                | 68<br>(14.9%)  | 130<br>(13.5%)   | 24<br>(7.8%)    | 32<br>(10.2%) | 56<br>(9.0%)   | 59<br>(8.5%)                  | 93<br>(13.4%)  | 152<br>(10.9%)    | 24<br>(7.1%)    | 29<br>(8.6%)  | 53<br>(7.9%)   |
| M24                 | Hamburger - all types           | 21<br>(4.1%)                 | 31<br>(6.8%)   | 52<br>(5.4%)     | 19<br>(6.2%)    | 21<br>(6.7%)  | 40<br>(6.4%)   | 45<br>(6.5%)                  | 41<br>(5.9%)   | 86<br>(6.2%)      | 37<br>(11.0%)   | 57<br>(16.9%) | 94<br>(14.0%)  |
| M25                 | Pizza                           | 40<br>(7.9%)                 | 35<br>(7.7%)   | 75<br>(7.8%)     | 18<br>(5.8%)    | 23<br>(7.3%)  | 41<br>(6.6%)   | 54<br>(7.8%)                  | 73<br>(10.5%)  | 127<br>(9.1%)     | 28<br>(8.3%)    | 36<br>(10.7%) | 64<br>(9.5%)   |
| M26                 | Pie, sausage roll, chiko roll   | 49<br>(9.6%)                 | 57<br>(12.5%)  | 106<br>(11.0%)   | 18<br>(5.8%)    | 30<br>(9.6%)  | 48<br>(7.7%)   | 68<br>(9.8%)                  | 89<br>(12.8%)  | 157<br>(11.3%)    | 26<br>(7.7%)    | 42<br>(12.5%) | 68<br>(10.1%)  |
| M27                 | Hot dog                         | -                            | -              | -                | 7<br>(2.3%)     | 12<br>(3.8%)  | 19<br>(3.1%)   | -                             | -              | -                 | 4<br>(1.2%)     | 11<br>(3.3%)  | 15<br>(2.2%)   |
| M28                 | Savoury pastries                | 28<br>(5.5%)                 | 16<br>(3.5%)   | 44<br>(4.6%)     | 3<br>(1.0%)     | 3<br>(1.0%)   | 6<br>(1.0%)    | 35<br>(5.0%)                  | 18<br>(2.6%)   | 53<br>(3.8%)      | 13<br>(3.9%)    | 7<br>(2.1%)   | 20<br>(3.0%)   |
| M29                 | Hash browns, potato scallops    | 16<br>(3.1%)                 | 7<br>(1.5%)    | 23<br>(2.4%)     | 4<br>(1.3%)     | 7<br>(2.2%)   | 11<br>(1.8%)   | 11<br>(1.6%)                  | 19<br>(2.7%)   | 30<br>(2.2%)      | 7<br>(2.1%)     | 12<br>(3.6%)  | 19<br>(2.8%)   |
| <b>Other Foods:</b> |                                 |                              |                |                  |                 |               |                |                               |                |                   |                 |               |                |
| O1                  | Chips (not potato)              | 59<br>(11.6%)                | 54<br>(11.8%)  | 113<br>(11.7%)   | 46<br>(14.9%)   | 42<br>(13.4%) | 88<br>(14.1%)  | 66<br>(9.5%)                  | 52<br>(7.5%)   | 118<br>(8.5%)     | 33<br>(9.8%)    | 31<br>(9.2%)  | 64<br>(9.5%)   |
| O2                  | Potato chips or crisps          | 95<br>(18.7%)                | 98<br>(21.4%)  | 193<br>(20%)     | 57<br>(18.5%)   | 64<br>(20.4%) | 121<br>(19.5%) | 125<br>(18.0%)                | 134<br>(19.2%) | 259<br>(18.6%)    | 42<br>(12.5%)   | 55<br>(16.3%) | 97<br>(14.4%)  |
| O3                  | Ice block – creamy              | 28<br>(5.5%)                 | 29<br>(6.3%)   | 57<br>(5.9%)     | 18<br>(5.8%)    | 21<br>(6.7%)  | 39<br>(6.3%)   | 36<br>(5.2%)                  | 31<br>(4.5%)   | 67<br>(4.8%)      | 15<br>(4.5%)    | 11<br>(3.3%)  | 26<br>(3.9%)   |
| O4                  | Ice block – water               | 29<br>(5.7%)                 | 29<br>(6.3%)   | 58<br>(6.0%)     | 32<br>(10.4%)   | 29<br>(9.2%)  | 61<br>(9.8%)   | 25<br>(3.6%)                  | 24<br>(3.5%)   | 49<br>(3.5%)      | 15<br>(4.5%)    | 10<br>(3.0%)  | 25<br>(3.7%)   |
| O5                  | Chocolate                       | 148<br>(29.1%)               | 129<br>(28.2%) | 277<br>(28.7%)   | 67<br>(21.8%)   | 60<br>(19.1%) | 127<br>(20.4%) | 186<br>(26.8%)                | 145<br>(20.9%) | 331<br>(23.8%)    | 72<br>(21.4%)   | 59<br>(17.5%) | 131<br>(19.5%) |

**Table S6b: Percentage of Australian children aged 9-12 years and 13-16 years consuming selected ACAES food categories, in the 2007 ANCNPAS and the 2011-12 NNPAS**

| ACAES FFQ Item       |                                            | 9 – 12 year old participants |                |                  |                 |               |                | 13 – 16 year old participants |                |                   |                 |               |                |
|----------------------|--------------------------------------------|------------------------------|----------------|------------------|-----------------|---------------|----------------|-------------------------------|----------------|-------------------|-----------------|---------------|----------------|
|                      |                                            | ANCNPAS (2007)               |                |                  | NNPAS (2011–12) |               |                | ANCNPAS (2007)                |                |                   | NNPAS (2011–12) |               |                |
|                      |                                            | Female<br>n=509              | Male<br>n=457  | Persons<br>n=966 | Female<br>n=308 | Male<br>n=314 | Total<br>n=622 | Female<br>n=694               | Male<br>n=695  | Persons<br>n=1389 | Female<br>n=336 | Male<br>n=337 | Total<br>n=673 |
| O6                   | Lollies without chocolate                  | 107<br>(21.0%)               | 102<br>(22.3%) | 209<br>(21.6%)   | 54<br>(17.5%)   | 52<br>(16.6%) | 106<br>(17.0%) | 141<br>(20.3%)                | 121<br>(17.4%) | 262<br>(18.9%)    | 54<br>(16.1%)   | 33<br>(9.8%)  | 87<br>(12.9%)  |
| O7                   | Low fat salad dressing or mayonnaise       | 13<br>(2.6%)                 | 5<br>(1.1%)    | 18<br>(1.9%)     | 4<br>(1.3%)     | 3<br>(1.0%)   | 7<br>(1.1%)    | 20<br>(2.9%)                  | 28<br>(4.0%)   | 48<br>(3.5%)      | 5<br>(1.5%)     | 5<br>(1.5%)   | 10<br>(1.5%)   |
| O8                   | Salad dressing or mayonnaise - not low fat | 39<br>(7.7%)                 | 39<br>(8.5%)   | 78<br>(8.1%)     | 27<br>(8.8%)    | 26<br>(8.3%)  | 53<br>(8.5%)   | 68<br>(9.8%)                  | 74<br>(10.6%)  | 142<br>(10.2%)    | 26<br>(7.7%)    | 37<br>(11.0%) | 63<br>(9.4%)   |
| O9                   | Nuts                                       | 24<br>(4.7%)                 | 16<br>(3.5%)   | 40<br>(4.1%)     | 7<br>(2.3%)     | 7<br>(2.2%)   | 14<br>(2.3%)   | 36<br>(5.2%)                  | 25<br>(3.6%)   | 61<br>(4.4%)      | 15<br>(4.5%)    | 9<br>(2.7%)   | 24<br>(3.6%)   |
| O10                  | Jam, honey, golden syrup, marmalade        | 90<br>(17.7%)                | 73<br>(16.0%)  | 163<br>(16.9%)   | 35<br>(11.4%)   | 38<br>(12.1%) | 73<br>(11.7%)  | 123<br>(17.7%)                | 111<br>(16.0%) | 234<br>(16.8%)    | 40<br>(11.9%)   | 44<br>(13.1%) | 84<br>(12.5%)  |
| O11                  | Peanut butter, Nutella                     | 67<br>(13.2%)                | 76<br>(16.6%)  | 143<br>(14.8%)   | 30<br>(9.7%)    | 36<br>(11.5%) | 66<br>(10.6%)  | 80<br>(11.5%)                 | 102<br>(14.7%) | 182<br>(13.1%)    | 34<br>(10.1%)   | 41<br>(12.2%) | 75<br>(11.1%)  |
| O12                  | Vegemite, Mighty Mite, Promite, Marmite    | 111<br>(21.8%)               | 76<br>(16.6%)  | 187<br>(19.4%)   | 54<br>(17.5%)   | 72<br>(22.9%) | 126<br>(20.3%) | 141<br>(20.3%)                | 97<br>(14.0%)  | 238<br>(17.1%)    | 42<br>(12.5%)   | 42<br>(12.5%) | 84<br>(12.5%)  |
| O13                  | Tomato sauce, barbecue sauce               | 131<br>(25.7%)               | 139<br>(30.4%) | 270<br>(30.0%)   | 44<br>(14.3%)   | 49<br>(15.6%) | 93<br>(15.0%)  | 159<br>(22.9%)                | 204<br>(29.4%) | 363<br>(26.1%)    | 51<br>(15.2%)   | 68<br>(20.2%) | 119<br>(17.7%) |
| O14                  | Devon, salami                              | 30<br>(5.9%)                 | 33<br>(7.2%)   | 63<br>(6.5%)     | 15<br>(4.9%)    | 18<br>(5.1%)  | 33<br>(5.3%)   | 37<br>(5.3%)                  | 50<br>(7.2%)   | 87<br>(6.2%)      | 5<br>(1.5%)     | 9<br>(2.7%)   | 14<br>(2.1%)   |
| O15                  | Bacon, ham                                 | 93<br>(18.3%)                | 90<br>(19.7%)  | 183<br>(18.9%)   | 64<br>(20.8%)   | 61<br>(19.4%) | 125<br>(20.1%) | 145<br>(20.9%)                | 156<br>(22.4%) | 301<br>(21.7%)    | 67<br>(19.9%)   | 71<br>(21.1%) | 138<br>(20.5%) |
| O16                  | Eggs                                       | 58<br>(11.4%)                | 60<br>(13.1%)  | 118<br>(12.2%)   | 38<br>(12.3%)   | 28<br>(8.9%)  | 66<br>(10.6%)  | 101<br>(14.6%)                | 86<br>(12.4%)  | 187<br>(13.5%)    | 42<br>(12.5%)   | 40<br>(11.9%) | 82<br>(12.2%)  |
| O17                  | Jelly                                      | 23<br>(4.5%)                 | 9<br>(2.0%)    | 32<br>(3.3%)     | 11<br>(3.6%)    | 6<br>(1.9%)   | 17<br>(2.7%)   | 10<br>(1.4%)                  | 6<br>(0.9%)    | 16<br>(1.2%)      | 6<br>(1.8%)     | 4<br>(1.2%)   | 10<br>(1.5%)   |
| Fruit and Vegetables |                                            |                              |                |                  |                 |               |                |                               |                |                   |                 |               |                |

**Table S6b: Percentage of Australian children aged 9-12 years and 13-16 years consuming selected ACAES food categories, in the 2007 ANCNPAS and the 2011-12 NNPAS**

|                |                                                | 9 – 12 year old participants |                |                  |                 |               |                | 13 – 16 year old participants |                |                   |                 |               |                |
|----------------|------------------------------------------------|------------------------------|----------------|------------------|-----------------|---------------|----------------|-------------------------------|----------------|-------------------|-----------------|---------------|----------------|
| ACAES FFQ Item |                                                | ANCNPAS (2007)               |                |                  | NNPAS (2011–12) |               |                | ANCNPAS (2007)                |                |                   | NNPAS (2011–12) |               |                |
|                |                                                | Female<br>n=509              | Male<br>n=457  | Persons<br>n=966 | Female<br>n=308 | Male<br>n=314 | Total<br>n=622 | Female<br>n=694               | Male<br>n=695  | Persons<br>n=1389 | Female<br>n=336 | Male<br>n=337 | Total<br>n=673 |
| F1-2           | Hot chips bought from a shop or cooked at home | 104<br>(20.4%)               | 94<br>(20.6%)  | 198<br>(20.5%)   | 58<br>(18.8%)   | 54<br>(17.2%) | 112<br>(18.0%) | 167<br>(24.1%)                | 154<br>(22.2%) | 321<br>(23.1%)    | 60<br>(17.9%)   | 58<br>(17.2%) | 118<br>(17.5%) |
| F3             | Potato boiled, mashed, baked                   | 125<br>(24.6%)               | 115<br>(25.2%) | 240<br>(24.8%)   | 45<br>(14.6%)   | 52<br>(16.6%) | 97<br>(15.6%)  | 158<br>(22.8%)                | 158<br>(22.7%) | 316<br>(22.8%)    | 63<br>(18.8%)   | 46<br>(13.6%) | 109<br>(16.2%) |
| F4             | Pumpkin                                        | 38<br>(7.5%)                 | 25<br>(5.5%)   | 63<br>(6.5%)     | 5<br>(1.6%)     | 12<br>(3.8%)  | 17<br>(2.7%)   | 50<br>(7.2%)                  | 27<br>(3.9%)   | 77<br>(5.5%)      | 10<br>(3.0%)    | 7<br>(2.1%)   | 17<br>(2.5%)   |
| F5             | Sweet potato                                   | 11<br>(2.2%)                 | 16<br>(3.5%)   | 27<br>(2.8%)     | 7<br>(2.3%)     | 6<br>(1.9%)   | 13<br>(2.1%)   | 22<br>(3.2%)                  | 20<br>(2.9%)   | 42<br>(3.0%)      | 2<br>(0.6%)     | 6<br>(1.8%)   | 8<br>(1.2%)    |
| F6             | Cauliflower                                    | 28<br>(5.5%)                 | 27<br>(5.9%)   | 55<br>(5.7%)     | 5<br>(1.6%)     | 8<br>(2.5%)   | 13<br>(2.1%)   | 37<br>(5.3%)                  | 30<br>(4.3%)   | 67<br>(4.8%)      | 6<br>(1.8%)     | 7<br>(2.1%)   | 13<br>(1.9%)   |
| F7             | Green beans                                    | 51<br>(10.0%)                | 32<br>(7.0%)   | 83<br>(8.6%)     | 11<br>(3.6%)    | 6<br>(1.9%)   | 17<br>(2.7%)   | 61<br>(8.8%)                  | 59<br>(8.5%)   | 120<br>(8.6%)     | 11<br>(3.3%)    | 14<br>(4.2%)  | 25<br>(3.7%)   |
| F8             | Spinach                                        | 13<br>(2.6%)                 | 8<br>(1.8%)    | 21<br>(2.2%)     | 10<br>(3.2%)    | 4<br>(1.3%)   | 14<br>(2.3%)   | 21<br>(3.0%)                  | 25<br>(3.6%)   | 46<br>(3.3%)      | 10<br>(3.0%)    | 2<br>(0.6%)   | 12<br>(1.8%)   |
| F9             | Cabbage or brussel sprouts                     | 12<br>(2.4%)                 | 15<br>(3.3%)   | 27<br>(2.8%)     | 1<br>(0.3%)     | 0<br>(0%)     | 1<br>(0.2%)    | 23<br>(3.3%)                  | 26<br>(3.7%)   | 49<br>(3.5%)      | 2<br>(0.6%)     | 4<br>(1.2%)   | 6<br>(0.9%)    |
| F10            | Peas                                           | 69<br>(13.6%)                | 56<br>(12.3%)  | 125<br>(12.9%)   | 13<br>(4.2%)    | 15<br>(4.8%)  | 28<br>(4.5%)   | 80<br>(11.5%)                 | 78<br>(11.2%)  | 168<br>(12.1%)    | 14<br>(4.2%)    | 17<br>(5.0%)  | 31<br>(4.6%)   |
| F11            | Broccoli                                       | 72<br>(14.1%)                | 57<br>(12.5%)  | 129<br>(13.4%)   | 14<br>(4.5%)    | 17<br>(5.4%)  | 31<br>(5.0%)   | 87<br>(12.5%)                 | 81<br>(11.7%)  | 168<br>(12.1%)    | 17<br>(5.1%)    | 14<br>(4.2%)  | 31<br>(4.6%)   |
| F12            | Carrots                                        | 170<br>(33.4%)               | 136<br>(30.0%) | 306<br>(31.7%)   | 44<br>(14.3%)   | 42<br>(13.4%) | 86<br>(13.8%)  | 203<br>(29.3%)                | 181<br>(26.0%) | 384<br>(27.6%)    | 40<br>(11.9%)   | 44<br>(13.1%) | 84<br>(12.5%)  |
| F13            | Zucchini, eggplant, squash                     | 21<br>(4.1%)                 | 16<br>(3.5%)   | 37<br>(3.8%)     | 3<br>(1.0%)     | 3<br>(1.0%)   | 6<br>(1.0%)    | 24<br>(3.5%)                  | 18<br>(2.6%)   | 42<br>(3.0%)      | 1<br>(0.3%)     | 4<br>(1.2%)   | 5<br>(0.7%)    |
| F14            | Capsicum                                       | 41<br>(8.1%)                 | 35<br>(7.7%)   | 76<br>(7.9%)     | 6<br>(1.9%)     | 4<br>(1.3%)   | 10<br>(1.6%)   | 55<br>(7.9%)                  | 49<br>(7.1%)   | 104<br>(7.5%)     | 7<br>(2.1%)     | 4<br>(1.2%)   | 11<br>(1.6%)   |
| F15            | Corn, sweetcorn, corn on the cob               | 53<br>(10.4%)                | 51<br>(11.2%)  | 104<br>(10.8%)   | 10<br>(3.2%)    | 15<br>(4.8%)  | 25<br>(4.0%)   | 58<br>(8.4%)                  | 54<br>(7.8%)   | 112<br>(8.1%)     | 15<br>(4.5%)    | 15<br>(4.5%)  | 30<br>(4.5%)   |

**Table S6b: Percentage of Australian children aged 9-12 years and 13-16 years consuming selected ACAES food categories, in the 2007 ANCNPAS and the 2011-12 NNPAS**

|                |                                    | 9 – 12 year old participants |                |                  |                 |                |                | 13 – 16 year old participants |                |                   |                 |               |                |
|----------------|------------------------------------|------------------------------|----------------|------------------|-----------------|----------------|----------------|-------------------------------|----------------|-------------------|-----------------|---------------|----------------|
| ACAES FFQ Item |                                    | ANCNPAS (2007)               |                |                  | NNPAS (2011–12) |                |                | ANCNPAS (2007)                |                |                   | NNPAS (2011–12) |               |                |
|                |                                    | Female<br>n=509              | Male<br>n=457  | Persons<br>n=966 | Female<br>n=308 | Male<br>n=314  | Total<br>n=622 | Female<br>n=694               | Male<br>n=695  | Persons<br>n=1389 | Female<br>n=336 | Male<br>n=337 | Total<br>n=673 |
| F16            | Mushrooms                          | 22<br>(4.3%)                 | 16<br>(3.5%)   | 38<br>(3.9%)     | 2<br>(0.6%)     | 5<br>(1.6%)    | 7<br>(1.1%)    | 41<br>(5.9%)                  | 25<br>(3.6%)   | 66<br>(4.8%)      | 3<br>(0.9%)     | 5<br>(1.5%)   | 8<br>(1.2%)    |
| F17            | Tomatoes                           | 111<br>(21.8%)               | 79<br>(17.3%)  | 190<br>(19.7%)   | 37<br>(12.0%)   | 30<br>(9.6%)   | 67<br>(10.8%)  | 135<br>(19.5%)                | 142<br>(20.4%) | 277<br>(19.9%)    | 39<br>(11.6%)   | 32<br>(9.5%)  | 71<br>(10.5%)  |
| F18            | Lettuce                            | 92<br>(18.1%)                | 67<br>(14.7%)  | 159<br>(16.5%)   | 34<br>(11.0%)   | 28<br>(8.9%)   | 62<br>(10.0%)  | 122<br>(17.6%)                | 134<br>(19.3%) | 156<br>(11.2%)    | 31<br>(9.2%)    | 48<br>(14.2%) | 79<br>(11.7%)  |
| F19            | Celery, cucumber                   | 68<br>(13.4%)                | 47<br>(10.3%)  | 115<br>(11.9%)   | 29<br>(9.4%)    | 15<br>(4.8%)   | 44<br>(7.1%)   | 94<br>(13.5%)                 | 76<br>(10.9%)  | 170<br>(12.2%)    | 20<br>(6.0%)    | 23<br>(6.8%)  | 43<br>(6.4%)   |
| F20            | Avocado                            | 17<br>(3.3%)                 | 12<br>(2.6%)   | 29<br>(3.0%)     | 8<br>(2.6%)     | 4<br>(1.3%)    | 12<br>(1.9%)   | 33<br>(4.8%)                  | 19<br>(2.7%)   | 52<br>(3.7%)      | 8<br>(2.4%)     | 2<br>(0.6%)   | 10<br>(1.5%)   |
| F21            | Onion, spring<br>onion, leek       | 78<br>(15.3%)                | 72<br>(15.8%)  | 150<br>(15.5%)   | 12<br>(3.9%)    | 12<br>(3.8%)   | 24<br>(3.9%)   | 138<br>(19.9%)                | 165<br>(23.7%) | 303<br>(21.8%)    | 21<br>(6.3%)    | 13<br>(3.9%)  | 34<br>(5.1%)   |
| F22            | Soybeans, tofu                     | 2<br>(0.4%)                  | 3<br>(0.7%)    | 5<br>(0.5%)      | 1<br>(0.3%)     | 1<br>(0.3%)    | 2<br>(0.3%)    | 5<br>(0.7%)                   | 7<br>(1.0%)    | 12<br>(0.9%)      | 3<br>(0.9%)     | 0<br>(0%)     | 3<br>(0.4%)    |
| F23            | Baked beans                        | 6<br>(1.2%)                  | 10<br>(2.2%)   | 16<br>(1.7%)     | 5<br>(1.6%)     | 6<br>(1.9%)    | 11<br>(1.8%)   | 12<br>(1.7%)                  | 12<br>(1.7%)   | 24<br>(1.7%)      | 3<br>(0.9%)     | 7<br>(2.1%)   | 10<br>(1.5%)   |
| F24            | Other beans,<br>lentils            | 7<br>(1.4%)                  | 11<br>(2.4%)   | 18<br>(1.9%)     | 2<br>(0.6%)     | 0<br>(0%)      | 2<br>(0.3%)    | 19<br>(2.7%)                  | 12<br>(1.7%)   | 31<br>(2.2%)      | 6<br>(1.8%)     | 2<br>(0.6%)   | 8<br>(1.2%)    |
| F25            | Canned fruit                       | 24<br>(4.7%)                 | 18<br>(3.9%)   | 42<br>(4.3%)     | 9<br>(2.9%)     | 3<br>(1.0%)    | 12<br>(1.9%)   | 22<br>(3.2%)                  | 19<br>(2.7%)   | 41<br>(3.0%)      | 6<br>(1.8%)     | 5<br>(1.5%)   | 11<br>(1.6%)   |
| F26            | Fruit salad                        | 9<br>(1.8%)                  | 8<br>(1.8%)    | 17<br>(1.8%)     | 10<br>(3.2%)    | 2<br>(0.6%)    | 12<br>(1.9%)   | 11<br>(1.6%)                  | 11<br>(1.6%)   | 22<br>(1.6%)      | 11<br>(3.3%)    | 2<br>(0.6%)   | 13<br>(1.9%)   |
| F27            | Dried fruit                        | 19<br>(3.7%)                 | 18<br>(3.9%)   | 37<br>(3.8%)     | 8<br>(2.6%)     | 6<br>(1.9%)    | 14<br>(2.3%)   | 36<br>(5.2%)                  | 28<br>(4.0%)   | 64<br>(4.6%)      | 9<br>(2.7%)     | 3<br>(0.9%)   | 12<br>(1.8%)   |
| F28            | Apple or pear                      | 198<br>(38.9%)               | 152<br>(33.3%) | 350<br>(36.2%)   | 97<br>(31.5%)   | 122<br>(38.9%) | 219<br>(35.2%) | 198<br>(28.5%)                | 173<br>(24.9%) | 371<br>(26.7%)    | 77<br>(22.9%)   | 89<br>(26.4%) | 166<br>(24.7%) |
| F29            | Orange,<br>mandarin,<br>grapefruit | 84<br>(16.5%)                | 66<br>(14.4%)  | 150<br>(15.5%)   | 55<br>(17.9%)   | 45<br>(14.3%)  | 100<br>(16.1%) | 125<br>(18.0%)                | 101<br>(14.5%) | 226<br>(16.3%)    | 41<br>(12.2%)   | 36<br>(10.7%) | 77<br>(11.4%)  |

**Table S6b: Percentage of Australian children aged 9-12 years and 13-16 years consuming selected ACAES food categories, in the 2007 ANCNPAS and the 2011-12 NNPAS**

|                         |                                   | 9 – 12 year old participants |                       |                          |                         |                       |                        | 13 – 16 year old participants |                       |                           |                         |                       |                        |
|-------------------------|-----------------------------------|------------------------------|-----------------------|--------------------------|-------------------------|-----------------------|------------------------|-------------------------------|-----------------------|---------------------------|-------------------------|-----------------------|------------------------|
| ACAES FFQ Item          |                                   | ANCNPAS (2007)               |                       |                          | NNPAS (2011–12)         |                       |                        | ANCNPAS (2007)                |                       |                           | NNPAS (2011–12)         |                       |                        |
|                         |                                   | Female<br><i>n</i> =509      | Male<br><i>n</i> =457 | Persons<br><i>n</i> =966 | Female<br><i>n</i> =308 | Male<br><i>n</i> =314 | Total<br><i>n</i> =622 | Female<br><i>n</i> =694       | Male<br><i>n</i> =695 | Persons<br><i>n</i> =1389 | Female<br><i>n</i> =336 | Male<br><i>n</i> =337 | Total<br><i>n</i> =673 |
| F30                     | Banana                            | 95<br>(18.7%)                | 77<br>(16.8%)         | 172<br>(17.8%)           | 46<br>(14.9%)           | 39<br>(12.4%)         | 85<br>(13.7%)          | 87<br>(12.5%)                 | 97<br>(14.0%)         | 184<br>(13.2%)            | 33<br>(9.8%)            | 31<br>(9.2%)          | 64<br>(9.5%)           |
| <b>Seasonal Fruits:</b> |                                   |                              |                       |                          |                         |                       |                        |                               |                       |                           |                         |                       |                        |
| SF1                     | Peach, nectarine, plum or apricot | 14<br>(2.8%)                 | 14<br>(3.1%)          | 28<br>(2.9%)             | 26<br>(8.4%)            | 13<br>(4.1%)          | 39<br>(6.3%)           | 21<br>(3.0%)                  | 9<br>(1.3%)           | 30<br>(2.2%)              | 23<br>(6.8%)            | 16<br>(4.7%)          | 39<br>(5.8%)           |
| SF2                     | Mango or Paw-paw                  | 0<br>(0%)                    | 7<br>(1.5%)           | 7<br>(0.7%)              | 8<br>(2.6%)             | 7<br>(2.2%)           | 15<br>(2.4%)           | 0<br>(0%)                     | 2<br>(0.3%)           | 2<br>(0.1%)               | 7<br>(2.1%)             | 1<br>(0.3%)           | 8<br>(1.2%)            |
| SF3                     | Pineapple                         | 9<br>(1.8%)                  | 6<br>(1.3%)           | 15<br>(1.6%)             | 5<br>(1.6%)             | 0<br>(0%)             | 5<br>(0.8%)            | 11<br>(1.6%)                  | 8<br>(1.2%)           | 19<br>(1.4%)              | 2<br>(0.6%)             | 2<br>(0.6%)           | 4<br>(0.6%)            |
| SF4                     | Grapes, strawberries, blueberries | 46<br>(9.0%)                 | 38<br>(8.3%)          | 84<br>(8.7%)             | 42<br>(13.6%)           | 36<br>(11.5%)         | 78<br>(12.5%)          | 57<br>(8.2%)                  | 40<br>(5.8%)          | 97<br>(7.0%)              | 35<br>(10.4%)           | 22<br>(6.5%)          | 57<br>(8.5%)           |
| SF5                     | Melon                             | 29<br>(5.7%)                 | 23<br>(5.0%)          | 52<br>(5.4%)             | 23<br>(7.5%)            | 12<br>(3.8%)          | 35<br>(5.6%)           | 25<br>(3.6%)                  | 20<br>(2.9%)          | 45<br>(3.2%)              | 18<br>(5.4%)            | 8<br>(2.4%)           | 26<br>(3.9%)           |
