# Supplementary material for: Trends in Food and Beverage Portion Sizes in Australian Children; a Time-Series Analysis Comparing 2007 and 2011–2012 National Data
Source: Children (Basel). 2017 Aug 4;4(8):69. doi: 10.3390/children4080069 (PMC5575591; doi:10.3390/children4080069)
Supplement: Supplementary file 1 [file children-04-00069-s001.zip]

Archive with 6 entries (6 files):
- Table S3_adj.pdf
- Table S4_adj.pdf
- Table S5_adj.pdf
- Table S6_adj.pdf
- Table S1_adj.pdf
- Table S2_adj.pdf
